# Supplementary material for: Evaluation of automatic discrimination between benign and malignant prostate tissue in the era of high precision digital pathology
Source: BMC Bioinformatics. 2023 Jan 3;24:1. doi: 10.1186/s12859-022-05124-9 (PMC9809030; doi:10.1186/s12859-022-05124-9)
Supplement: Supplementary file 2 — Additional file 2: Classification labels (benign=0; malignant=1) for each tissue core. [file 12859_2022_5124_MOESM2_ESM.xlsx]

## Sheet: RPX1
Name	Label
1-E	1
1-D	0
1-C	0
1-B	0
1-A	1
2-A	0
2-E	0
2-D	1
3-E	1
3-D	0
3-C	1
3-B	1
3-A	1
4-E	0
4-D	1
4-C	0
4-B	0
4-A	0
5-E	1
5-D	0
5-C	1
5-B	1
5-A	1
6-E	0
6-D	1
6-C	0
6-B	0
6-A	0
7-E	1
7-D	0
7-C	1
7-B	1
7-A	1
8-E	0
8-D	1
8-C	0
8-B	0
8-A	0
9-D	0
9-C	1
9-B	1
9-A	1

## Sheet: RPX2
Name	Label
1-E	0
1-B	0
1-A	1
2-E	0
2-D	0
2-B	1
2-A	0
3-E	0
3-D	1
3-C	1
3-B	0
3-A	1
4-E	0
4-D	0
4-C	0
4-B	1
4-A	0
5-E	0
5-D	1
5-C	1
5-B	0
5-A	1
6-E	0
6-D	0
6-C	0
6-B	1
6-A	0
7-E	0
7-D	1
7-C	1
7-B	0
7-A	1
8-E	0
8-D	0
8-C	0
8-B	1
8-A	0
9-E	0
9-D	1
9-C	1
9-B	0
9-A	1

## Sheet: RPX3
Name	Label
1-C	0
1-B	0
1-A	0
2-C	0
2-B	0
2-A	0
3-C	0
3-B	0
3-A	0
4-C	0
4-B	0
4-A	0
5-C	0
5-B	0
5-A	0
6-C	0
6-B	0
6-A	0
7-B	0
7-A	0
8-B	0
8-A	0
