# Supplementary material for: Evaluation of automatic discrimination between benign and malignant prostate tissue in the era of high precision digital pathology
Source: BMC Bioinformatics. 2023 Jan 3;24:1. doi: 10.1186/s12859-022-05124-9 (PMC9809030; doi:10.1186/s12859-022-05124-9)
Supplement: Supplementary file 3 — Additional file 3: Feature values for ERG stain. [file 12859_2022_5124_MOESM3_ESM.xlsx]

## Sheet: RPX1
Name	Centroid X µm	Centroid Y µm	OD Sum: Mean	OD Sum: Std.dev.	OD Sum: Min	OD Sum: Max	OD Sum: Median	OD Sum: Haralick Angular second moment (F0)	OD Sum: Haralick Contrast (F1)	OD Sum: Haralick Correlation (F2)	OD Sum: Haralick Sum of squares (F3)	OD Sum: Haralick Inverse difference moment (F4)	OD Sum: Haralick Sum average (F5)	OD Sum: Haralick Sum variance (F6)	OD Sum: Haralick Sum entropy (F7)	OD Sum: Haralick Entropy (F8)	OD Sum: Haralick Difference variance (F9)	OD Sum: Haralick Difference entropy (F10)	OD Sum: Haralick Information measure of correlation 1 (F11)	OD Sum: Haralick Information measure of correlation 2 (F12)	Hematoxylin: Mean	Hematoxylin: Std.dev.	Hematoxylin: Min	Hematoxylin: Max	Hematoxylin: Median	Hematoxylin: Haralick Angular second moment (F0)	Hematoxylin: Haralick Contrast (F1)	Hematoxylin: Haralick Correlation (F2)	Hematoxylin: Haralick Sum of squares (F3)	Hematoxylin: Haralick Inverse difference moment (F4)	Hematoxylin: Haralick Sum average (F5)	Hematoxylin: Haralick Sum variance (F6)	Hematoxylin: Haralick Sum entropy (F7)	Hematoxylin: Haralick Entropy (F8)	Hematoxylin: Haralick Difference variance (F9)	Hematoxylin: Haralick Difference entropy (F10)	Hematoxylin: Haralick Information measure of correlation 1 (F11)	Hematoxylin: Haralick Information measure of correlation 2 (F12)	DAB: Mean	DAB: Std.dev.	DAB: Min	DAB: Max	DAB: Median	DAB: Haralick Angular second moment (F0)	DAB: Haralick Contrast (F1)	DAB: Haralick Correlation (F2)	DAB: Haralick Sum of squares (F3)	DAB: Haralick Inverse difference moment (F4)	DAB: Haralick Sum average (F5)
1-E	2935.2	3072.2	0.4412	0.6939	0	4.1322	0.1095	0.1312	25.5779	0.8047	65.4728	0.5738	9.9516	193.871	3.3936	5.9431	0.0072	2.8479	-0.2406	0.8931	0.0616	0.1085	-0.1035	1.1794	0.0185	0.4059	3.5924	0.6346	4.9157	0.7625	1.9479	13.6019	1.6131	3.1282	0.0145	1.7201	-0.1871	0.6834	0.2136	0.3538	-0.0333	1.8608	0.0365	0.2477	18.9916	0.8271	54.9346	0.6545	8.2501
1-D	6789.3	2960.6	0.1163	0.208	0	3.544	0.0515	0.3402	3.6148	0.7244	6.5584	0.7712	2.0876	19.9926	1.6745	3.3061	0.0144	1.6617	-0.2438	0.7707	0.0532	0.0989	-0.0718	1.1355	0.0155	0.5054	2.4524	0.7012	4.1041	0.8203	1.6026	12.1255	1.3826	2.6076	0.0176	1.4087	-0.2643	0.7359	0.0198	0.0612	-0.047	1.4556	0.0115	0.8569	0.8431	0.7343	1.5865	0.9641	0.2637
1-C	9532.9	2590.5	0.1932	0.2848	0	3.0094	0.0715	0.2088	7.5319	0.7016	12.6197	0.6666	4.1547	34.2068	2.4537	4.5824	0.0101	2.2213	-0.2343	0.8359	0.1087	0.1655	-0.0211	1.4869	0.0355	0.2558	7.027	0.7026	11.8126	0.6879	3.8763	31.968	2.3052	4.3072	0.0111	2.1381	-0.2421	0.8304	0.0125	0.0319	-0.0684	1.2634	0.0045	0.858	0.3323	0.5409	0.3619	0.9629	0.1162
1-B	13057.6	2613.3	0.2356	0.3495	0	3.9081	0.1015	0.1266	11.5124	0.6811	18.0489	0.6213	5.0147	50.58	2.8456	5.1972	0.0086	2.4443	-0.2108	0.8341	0.0972	0.1472	-0.0568	1.383	0.0315	0.3027	6.477	0.6598	9.5183	0.6936	3.2717	25.3434	2.1191	3.9995	0.0115	2.0991	-0.2066	0.7695	0.0504	0.1209	-0.0471	1.6263	0.0215	0.5101	3.6825	0.7143	6.4436	0.8577	1.3203
1-A	16267.1	2450.3	0.1387	0.2768	0	3.7045	0.0495	0.3092	8.7363	0.6192	11.4709	0.7174	2.6139	33.0782	1.8217	3.6718	0.0121	2.0356	-0.1548	0.6701	0.0601	0.1141	-0.0497	1.3766	0.0185	0.4553	5.3083	0.5251	5.5886	0.7767	1.8194	14.7762	1.4828	2.9129	0.0155	1.7159	-0.1629	0.6268	0.0268	0.0948	-0.0477	1.6197	0.0095	0.7614	2.3631	0.695	3.8732	0.9293	0.6242
2-E	2974.3	6262.7	0.1892	0.2639	0	3.6118	0.0855	0.1565	6.505	0.6984	10.7831	0.6435	3.912	29.7383	2.4875	4.7236	0.0092	2.2266	-0.2055	0.8093	0.0981	0.1367	-0.0427	1.2414	0.0365	0.2481	4.8949	0.6984	8.114	0.6859	3.3123	21.6265	2.1859	4.1743	0.0109	2.0645	-0.2202	0.7987	0.0206	0.0648	-0.052	1.4912	0.0115	0.8283	1.1597	0.6745	1.7812	0.9527	0.2945
2-D	6636.5	6285.9	0.2198	0.3001	0	3.7045	0.1055	0.108	9.2843	0.6613	13.7034	0.5923	4.6655	37.4654	2.8356	5.2488	0.0077	2.474	-0.1736	0.7872	0.1069	0.1409	-0.054	1.2763	0.0435	0.186	6.6061	0.6217	8.73	0.6288	3.6218	22.0512	2.4101	4.6271	0.0088	2.3103	-0.1634	0.7403	0.0311	0.0894	-0.0587	1.53	0.0175	0.7144	1.9216	0.7241	3.4825	0.9167	0.583
2-A	16804.2	5634.8	0.1935	0.2821	0	3.6496	0.0725	0.1861	8.2259	0.6685	12.4086	0.6316	4.0218	33.5189	2.4725	4.7275	0.0089	2.3471	-0.1787	0.7726	0.0965	0.1471	-0.0453	1.2691	0.0275	0.2868	6.363	0.6594	9.3417	0.6825	3.3253	24.6888	2.1608	4.0906	0.011	2.136	-0.1929	0.7581	0.0249	0.07	-0.0667	1.5018	0.0125	0.717	1.2387	0.7019	2.0779	0.926	0.4344
3-D	7242.2	9774.1	0.1435	0.2667	0	3.6496	0.0485	0.3151	6.9638	0.6759	10.7412	0.7277	2.8008	31.3185	1.9367	3.7446	0.0127	1.9605	-0.2006	0.7466	0.0652	0.1184	-0.0445	1.1946	0.0175	0.424	4.2932	0.6401	5.9637	0.774	2.083	16.6731	1.6321	3.1085	0.0153	1.6978	-0.2081	0.711	0.0248	0.0861	-0.0511	1.513	0.0095	0.7716	1.853	0.71	3.1943	0.9376	0.513
3-C	10095.9	9436.2	0.1703	0.3308	0	3.7635	0.0555	0.2562	9.7516	0.6997	16.2344	0.6862	3.4789	48.4119	2.1428	4.1574	0.0109	2.1824	-0.1863	0.7505	0.0725	0.1308	-0.0559	1.3806	0.0215	0.3576	5.4972	0.6261	7.3515	0.7406	2.3404	20.4913	1.7513	3.4466	0.0133	1.882	-0.1874	0.7063	0.0341	0.122	-0.0582	1.5586	0.0085	0.7273	3.1291	0.7582	6.4699	0.9102	0.9231
3-B	13587.5	8973.4	0.2722	0.4137	0	3.8427	0.1105	0.153	10.4924	0.7961	25.7222	0.6416	6.1759	76.3784	3.0559	5.2619	0.0093	2.3708	-0.2966	0.9144	0.102	0.1463	-0.2125	1.2597	0.0395	0.2403	4.703	0.7433	9.1605	0.6958	3.5832	25.1809	2.3144	4.2593	0.0113	2.0224	-0.2613	0.8466	0.0684	0.1785	-0.0445	1.6468	0.0165	0.579	4.5675	0.837	14.0132	0.8548	2.2533
3-A	17253.7	9399.5	0.3015	0.574	0	4.0779	0.0765	0.1774	19.2167	0.78	43.6782	0.6278	6.49	134.296	2.7305	5.0546	0.0088	2.5585	-0.2034	0.8216	0.0863	0.1549	-0.0826	1.3475	0.0235	0.3495	7.3608	0.6471	10.4286	0.7185	2.9031	29.059	1.8863	3.6581	0.0126	2.0301	-0.1755	0.7051	0.1021	0.2521	-0.0519	1.7415	0.0195	0.4577	9.1143	0.8374	28.0217	0.8002	3.615
4-E	2802.1	12543.1	0.1045	0.2025	0	3.7209	0.0395	0.3873	3.3515	0.7318	6.2471	0.7827	1.8775	19.3915	1.5005	3.0545	0.0149	1.608	-0.2302	0.7367	0.0506	0.1042	-0.039	1.2441	0.0135	0.5354	2.4896	0.7266	4.5528	0.8315	1.5368	13.9836	1.2795	2.4568	0.0183	1.3575	-0.2633	0.7213	0.0149	0.0485	-0.059	1.4344	0.0075	0.8801	0.579	0.6984	0.9596	0.9679	0.1679
4-D	6836.9	13014.8	0.3137	0.3366	0	3.9086	0.2065	0.0511	10.3484	0.6974	17.1	0.5169	7.1233	45.9819	3.6095	6.2171	0.006	2.695	-0.1932	0.8525	0.1649	0.1689	-0.0389	1.4121	0.1035	0.0643	8.5801	0.6562	12.4768	0.5367	6.1429	30.9722	3.3452	5.9035	0.0064	2.6066	-0.1859	0.8319	0.0318	0.0946	-0.0458	1.5892	0.0195	0.7322	1.5274	0.8056	3.9293	0.9258	0.5596
4-C	10068.6	12583.7	0.1435	0.2583	0	3.3619	0.0335	0.328	6.6309	0.6761	10.2366	0.7237	2.9913	28.8474	1.9519	3.7653	0.0126	1.9847	-0.2139	0.7677	0.0752	0.1397	-0.033	1.2977	0.0135	0.4144	5.2937	0.6791	8.248	0.7582	2.5922	23.2138	1.7519	3.3125	0.0146	1.8007	-0.2309	0.7577	0.0148	0.0473	-0.0636	1.4212	0.0025	0.813	0.7007	0.6036	0.8838	0.9493	0.2186
4-B	13241.7	12103.4	0.1808	0.2689	0	3.5593	0.0725	0.2038	6.5991	0.7015	11.0531	0.6619	3.8548	30.2662	2.4456	4.5586	0.0099	2.1945	-0.223	0.8223	0.0954	0.1374	-0.0291	1.39	0.0335	0.2496	4.8446	0.6969	7.9903	0.686	3.3321	21.1739	2.2363	4.1993	0.0109	2.0625	-0.2263	0.8072	0.0179	0.068	-0.062	1.5106	0.0055	0.8349	1.1692	0.6993	1.9444	0.952	0.3237
4-A	17330.1	12296.4	0.1855	0.2603	0	3.5448	0.0875	0.1627	5.8136	0.7225	10.4744	0.6679	3.8546	29.4487	2.4935	4.6339	0.01	2.1311	-0.2359	0.84	0.0949	0.141	-0.0366	1.3505	0.0345	0.2753	4.7571	0.7239	8.6141	0.7096	3.2176	23.8836	2.147	4.0346	0.0118	1.9782	-0.2451	0.8192	0.0214	0.0554	-0.0484	1.4692	0.0145	0.7967	0.857	0.665	1.2793	0.9505	0.2619
5-E	2659.1	15927.7	0.2325	0.3393	0	3.7599	0.0965	0.1239	12.5464	0.6429	17.5652	0.581	4.9354	47.6335	2.8077	5.2954	0.0074	2.6067	-0.155	0.7604	0.111	0.1604	-0.0522	1.3669	0.0375	0.2186	9.0039	0.6036	11.357	0.6347	3.8188	28.9164	2.3841	4.5643	0.0092	2.383	-0.1565	0.7265	0.0349	0.1027	-0.0491	1.5864	0.0165	0.6333	2.6618	0.712	4.6206	0.8967	0.7411
5-D	7134.2	15991.5	0.1472	0.2404	0	3.3577	0.0535	0.2662	5.153	0.7086	8.8406	0.7078	2.9845	25.2581	2.0723	3.9832	0.0116	1.9811	-0.2231	0.7918	0.0786	0.1253	-0.03	1.2563	0.0255	0.325	4.0098	0.6983	6.6461	0.7332	2.6222	18.4576	1.9053	3.6459	0.0129	1.8573	-0.2299	0.7788	0.0136	0.0575	-0.0565	1.4198	0.0025	0.8788	0.8027	0.7053	1.3619	0.9657	0.232
5-C	10000.7	15080.2	0.1685	0.3167	0	3.8236	0.0445	0.3068	10.3539	0.6564	15.0652	0.6995	3.5886	42.259	2.1519	4.0507	0.0118	2.1654	-0.202	0.7689	0.0837	0.1523	-0.0486	1.3413	0.0175	0.3788	7.358	0.6284	9.8997	0.7267	2.9242	26.7482	1.9059	3.5869	0.0133	1.99	-0.1932	0.7271	0.022	0.0873	-0.0573	1.6498	0.0045	0.7894	2.0883	0.68	3.2633	0.9389	0.4825
5-B	13673.8	15351.7	0.1525	0.2636	0	3.8013	0.0795	0.1805	6.1888	0.6976	10.2316	0.6902	2.9539	30.7558	2.1378	4.1787	0.0108	2.0267	-0.1922	0.7621	0.0666	0.105	-0.0451	1.1708	0.0315	0.3232	3.3749	0.6448	4.7507	0.7458	1.9542	13.3951	1.6462	3.3659	0.0132	1.7725	-0.1883	0.7038	0.0289	0.0942	-0.0652	1.5534	0.0125	0.7327	2.0236	0.7372	3.8495	0.9245	0.6005
5-A	17545.9	15047.1	0.1486	0.2221	0	3.5606	0.0705	0.2	4.8814	0.6757	7.5264	0.6812	2.9846	20.8879	2.1713	4.2289	0.0105	2.0504	-0.1955	0.7708	0.0799	0.1234	-0.0444	1.2148	0.0315	0.2664	4.0758	0.6843	6.4551	0.7164	2.625	17.9526	1.9535	3.8334	0.0119	1.9156	-0.2126	0.7696	0.0132	0.0413	-0.0555	1.4415	0.0045	0.8695	0.4688	0.648	0.6658	0.965	0.1355
6-E	2996.4	19000	0.2074	0.334	0	3.9521	0.0685	0.2101	8.51	0.7438	16.6094	0.6576	4.4396	47.8034	2.4989	4.6544	0.0098	2.2647	-0.2261	0.8294	0.0952	0.1501	-0.0566	1.2375	0.0225	0.3276	5.2154	0.729	9.6214	0.7128	3.3582	26.481	2.1055	3.8852	0.0123	1.9803	-0.2403	0.8044	0.035	0.108	-0.0451	1.5951	0.0155	0.6622	2.4241	0.7622	5.096	0.9018	0.7848
6-D	7125.5	18945.5	0.2875	0.3423	0	3.7028	0.1625	0.0592	11.0652	0.6828	17.4399	0.5345	6.4093	48.441	3.4408	5.9789	0.0063	2.6715	-0.1842	0.8323	0.1475	0.1642	-0.0411	1.5039	0.0765	0.083	8.4743	0.6443	11.9128	0.5466	5.3366	29.7425	3.0695	5.6183	0.0066	2.582	-0.1642	0.7886	0.0327	0.1078	-0.0526	1.5343	0.0165	0.7898	2.5082	0.755	5.1174	0.935	0.6903
6-C	10502.4	18550.1	0.1942	0.3404	0	3.8458	0.0515	0.2969	10.4652	0.706	17.7963	0.6864	4.1077	50.7276	2.2505	4.2189	0.0113	2.2201	-0.2108	0.7898	0.0969	0.173	-0.3954	1.3088	0.0195	0.3906	7.7058	0.7031	12.9759	0.7237	3.4418	36.4852	2.0044	3.6676	0.0133	2.0034	-0.2189	0.7666	0.0249	0.0872	-0.0495	1.5177	0.0095	0.7503	2.1508	0.6725	3.2832	0.9321	0.4969
6-B	13833.2	18871.4	0.1451	0.2669	0	3.7045	0.0535	0.2945	8.3767	0.6147	10.8689	0.7055	2.8163	30.4581	1.9269	3.8296	0.0117	2.0844	-0.1665	0.7027	0.0725	0.1274	-0.0393	1.2459	0.0235	0.3922	5.7392	0.5906	7.0083	0.7439	2.3126	18.8235	1.7063	3.3229	0.0138	1.8779	-0.1771	0.6843	0.0185	0.078	-0.0514	1.443	0.0065	0.8679	1.8771	0.6399	2.6062	0.9598	0.3539
6-A	17440.8	18185.5	0.1897	0.2804	0	3.6843	0.0845	0.1634	7.2222	0.7019	12.1114	0.6512	3.9849	33.9689	2.5092	4.7306	0.0095	2.2233	-0.2093	0.8137	0.0945	0.1361	-0.0494	1.243	0.0385	0.2304	4.8296	0.6962	7.9479	0.6912	3.1969	21.6127	2.189	4.2016	0.011	2.0372	-0.2185	0.7976	0.0244	0.0766	-0.0618	1.4483	0.0095	0.7537	1.5187	0.6941	2.482	0.9323	0.4958
7-E	3155.5	22238.7	0.2193	0.3687	0	3.635	0.0535	0.2659	11.6721	0.7216	20.9626	0.6836	4.8983	58.7684	2.4976	4.5557	0.0112	2.2611	-0.2451	0.8455	0.1042	0.1797	-0.0504	1.415	0.0215	0.3314	8.729	0.6864	13.9176	0.7154	3.7869	38.2632	2.1984	4.0169	0.0128	2.07	-0.2393	0.8117	0.0335	0.0892	-0.0484	1.5035	0.0075	0.6481	1.7814	0.7327	3.3323	0.9123	0.8849
7-D	7187.5	22338.9	0.1584	0.2841	0	3.7599	0.0625	0.2482	7.2305	0.7024	12.1488	0.7033	3.1338	35.9993	2.0793	4.0526	0.0114	2.0476	-0.2082	0.7772	0.0703	0.1194	-0.1727	1.0468	0.0245	0.4027	3.9472	0.6775	6.12	0.7628	2.2149	17.3203	1.6684	3.2204	0.0145	1.7369	-0.2227	0.7402	0.0289	0.0996	-0.05	1.5532	0.0105	0.7695	2.2931	0.7329	4.2925	0.9297	0.6868
7-C	10343	21637.6	0.3007	0.5218	0	3.7782	0.0845	0.1762	17.9279	0.7816	41.0427	0.6287	6.7696	124.282	2.9341	5.2598	0.0089	2.5366	-0.242	0.8714	0.0567	0.0964	-0.1053	1.239	0.0175	0.4038	2.7897	0.6359	3.8313	0.7756	1.731	10.6063	1.5363	3.0301	0.0149	1.6286	-0.1985	0.6925	0.131	0.2584	-0.0329	1.7361	0.0225	0.3349	11.3933	0.8067	29.4751	0.7351	4.8805
7-B	14163	21896.1	0.1864	0.2689	0	3.7837	0.0735	0.1873	7.042	0.6892	11.328	0.6461	3.8333	31.0847	2.4082	4.6174	0.0093	2.2593	-0.1912	0.785	0.0995	0.1471	-0.057	1.3709	0.0345	0.255	5.7675	0.6952	9.4609	0.6826	3.3621	25.8683	2.1864	4.1849	0.0108	2.1138	-0.2055	0.7808	0.0174	0.0524	-0.0553	1.4598	0.0095	0.8213	0.7945	0.6498	1.1342	0.9525	0.1898
7-A	17087.5	21289.4	0.1324	0.2324	0	3.6496	0.0625	0.2594	4.965	0.6972	8.1984	0.7233	2.421	24.6646	1.8619	3.7388	0.0121	1.8922	-0.1949	0.7382	0.0612	0.1013	-0.0422	1.1062	0.0245	0.4077	3.2333	0.6321	4.3942	0.775	1.7866	12.2726	1.5366	3.0408	0.0149	1.6533	-0.2034	0.6987	0.0218	0.0774	-0.0456	1.5379	0.0105	0.8452	1.1566	0.775	2.5697	0.9565	0.403
8-E	3637.7	25289.9	0.2058	0.3537	0	3.865	0.0595	0.2673	10.3235	0.7334	19.3632	0.6862	4.4384	55.9336	2.3635	4.3966	0.0111	2.2204	-0.2343	0.8265	0.1043	0.1838	-0.0332	1.5272	0.0235	0.3605	7.87	0.7328	14.727	0.7218	3.7247	42.2788	2.102	3.8478	0.0131	2.0222	-0.2397	0.8022	0.0249	0.0794	-0.0638	1.6061	0.0095	0.7182	1.7224	0.6789	2.682	0.9294	0.4985
8-D	7588.2	25143.7	0.162	0.2613	0	3.7221	0.0665	0.2105	7.7386	0.6245	10.3042	0.6552	3.1856	28.3606	2.2201	4.3433	0.0097	2.2425	-0.157	0.7163	0.0775	0.1139	-0.2038	1.277	0.0295	0.2885	4.7268	0.5778	5.5976	0.6979	2.4379	14.3168	1.9235	3.7819	0.0114	2.0162	-0.1606	0.6878	0.0241	0.0848	-0.0462	1.5485	0.0085	0.7773	1.918	0.6884	3.0777	0.9308	0.5235
8-C	10772.6	24856.7	0.1459	0.2453	0	3.4479	0.0515	0.2857	5.8719	0.6813	9.2116	0.7181	2.9047	26.1474	2.0194	3.8827	0.0121	1.9587	-0.2256	0.7888	0.0735	0.117	-0.0418	1.2367	0.0225	0.3633	3.7511	0.6761	5.791	0.7506	2.3974	15.8224	1.7971	3.4264	0.0138	1.7767	-0.2361	0.7713	0.0179	0.0702	-0.0474	1.4316	0.0055	0.8559	1.3752	0.6695	2.08	0.9552	0.3549
8-B	13954.3	24909.8	0.1254	0.2198	0	3.6868	0.0485	0.2979	5.5493	0.6286	7.4708	0.7206	2.3268	21.2008	1.7412	3.5983	0.0121	1.9386	-0.1698	0.6935	0.0659	0.1179	-0.3334	1.1686	0.0225	0.409	4.3206	0.6382	5.9701	0.766	2.026	16.855	1.5487	3.1109	0.0145	1.7382	-0.1974	0.6986	0.0128	0.0481	-0.049	1.4279	0.0055	0.9105	0.7668	0.5975	0.9525	0.974	0.14
8-A	17756	24151.1	0.1776	0.2838	0	3.7045	0.0715	0.2098	6.821	0.7235	12.3348	0.6808	3.5786	35.9586	2.2733	4.3573	0.0105	2.1219	-0.2191	0.8075	0.0861	0.1407	-0.2764	1.2701	0.0265	0.3577	4.8363	0.7199	8.6325	0.7368	2.849	24.6028	1.9158	3.6074	0.0133	1.8777	-0.238	0.7854	0.0252	0.0761	-0.0469	1.5158	0.0135	0.7743	1.5064	0.6982	2.4959	0.9389	0.4222
9-D	7444.8	27876.6	0.1371	0.256	0	3.6118	0.0425	0.3347	6.4795	0.6708	9.8423	0.7259	2.7194	28.3878	1.9135	3.6713	0.0127	1.9575	-0.1994	0.7415	0.0654	0.1109	-0.0449	1.0916	0.0185	0.3973	3.8323	0.6282	5.1542	0.7549	2.1076	13.9167	1.6854	3.228	0.0142	1.7604	-0.2007	0.7114	0.0205	0.0859	-0.0526	1.4934	0.0045	0.8407	1.7383	0.7239	3.1478	0.9478	0.5011
9-C	10536	27793	0.4213	0.6231	0	4.0267	0.1295	0.1143	20.8068	0.8186	57.3451	0.5621	9.7549	170.775	3.5154	6.1283	0.0069	2.8271	-0.2465	0.9034	0.0797	0.1184	-0.0661	1.2652	0.0305	0.2788	4.2409	0.6445	5.9637	0.708	2.5931	15.8618	1.9736	3.841	0.0117	1.9551	-0.1941	0.744	0.1832	0.3082	-0.0367	1.7606	0.0325	0.2666	12.6385	0.8497	42.0321	0.6786	7.039
9-B	14117.6	27533.5	0.1671	0.2307	0	3.577	0.0875	0.1611	5.3771	0.6691	8.1245	0.6607	3.3889	22.0969	2.4059	4.5387	0.0098	2.1209	-0.2057	0.798	0.0884	0.1169	-0.0406	1.3288	0.0415	0.2105	3.9858	0.6595	5.8526	0.6843	2.9067	15.2674	2.178	4.1837	0.0107	2.0139	-0.2063	0.7795	0.0164	0.061	-0.053	1.4538	0.0075	0.8794	1.0217	0.6742	1.568	0.9654	0.2484
9-A	17620.3	27113.6	0.2193	0.3894	0	3.7811	0.0665	0.2113	10.8228	0.772	23.7317	0.6515	4.6963	72.4846	2.4789	4.6809	0.0096	2.3359	-0.2082	0.8091	0.0728	0.1197	-0.0552	1.5996	0.0265	0.3258	3.7209	0.6984	6.1676	0.733	2.2905	17.8304	1.8067	3.536	0.0128	1.8405	-0.1995	0.7309	0.0643	0.1668	-0.0582	1.5568	0.0105	0.5971	4.8506	0.7993	12.0812	0.8526	2.2014
[truncated: 124 more columns]

## Sheet: RPX2
Name	Centroid X µm	Centroid Y µm	OD Sum: Mean	OD Sum: Std.dev.	OD Sum: Min	OD Sum: Max	OD Sum: Median	OD Sum: Haralick Angular second moment (F0)	OD Sum: Haralick Contrast (F1)	OD Sum: Haralick Correlation (F2)	OD Sum: Haralick Sum of squares (F3)	OD Sum: Haralick Inverse difference moment (F4)	OD Sum: Haralick Sum average (F5)	OD Sum: Haralick Sum variance (F6)	OD Sum: Haralick Sum entropy (F7)	OD Sum: Haralick Entropy (F8)	OD Sum: Haralick Difference variance (F9)	OD Sum: Haralick Difference entropy (F10)	OD Sum: Haralick Information measure of correlation 1 (F11)	OD Sum: Haralick Information measure of correlation 2 (F12)	Hematoxylin: Mean	Hematoxylin: Std.dev.	Hematoxylin: Min	Hematoxylin: Max	Hematoxylin: Median	Hematoxylin: Haralick Angular second moment (F0)	Hematoxylin: Haralick Contrast (F1)	Hematoxylin: Haralick Correlation (F2)	Hematoxylin: Haralick Sum of squares (F3)	Hematoxylin: Haralick Inverse difference moment (F4)	Hematoxylin: Haralick Sum average (F5)	Hematoxylin: Haralick Sum variance (F6)	Hematoxylin: Haralick Sum entropy (F7)	Hematoxylin: Haralick Entropy (F8)	Hematoxylin: Haralick Difference variance (F9)	Hematoxylin: Haralick Difference entropy (F10)	Hematoxylin: Haralick Information measure of correlation 1 (F11)	Hematoxylin: Haralick Information measure of correlation 2 (F12)	DAB: Mean	DAB: Std.dev.	DAB: Min	DAB: Max	DAB: Median	DAB: Haralick Angular second moment (F0)	DAB: Haralick Contrast (F1)	DAB: Haralick Correlation (F2)	DAB: Haralick Sum of squares (F3)	DAB: Haralick Inverse difference moment (F4)	DAB: Haralick Sum average (F5)
9-A	2015.4	4527.4	0.1831	0.3231	0	4.1219	0.0595	0.2495	9.3872	0.6822	14.7672	0.676	3.7507	42.0302	2.3054	4.3396	0.0106	2.2108	-0.2043	0.7868	0.0905	0.1378	-0.0962	1.4645	0.0295	0.2979	5.6629	0.658	8.2786	0.703	3.0149	22.2085	2.083	3.9427	0.0117	2.0327	-0.2076	0.7682	0.0251	0.1168	-0.032	1.806	0.0055	0.8364	3.3216	0.7104	5.7354	0.9441	0.6689
9-B	4766.6	3547.3	0.1431	0.2436	0	3.5431	0.0355	0.3482	5.2664	0.7095	9.0642	0.7368	2.9823	25.4796	1.9686	3.6819	0.0133	1.8883	-0.2526	0.8067	0.0817	0.1377	-0.0234	1.3555	0.0205	0.3793	4.4916	0.7209	8.0472	0.7504	2.8157	22.625	1.8904	3.5027	0.0141	1.8065	-0.2645	0.8074	0.0091	0.0395	-0.0399	1.5552	0	0.9161	0.4884	0.6055	0.619	0.9767	0.1198
9-C	8075.5	3395.1	0.3872	0.6604	0	4.2814	0.0965	0.1497	29.7781	0.7467	58.781	0.5791	8.6647	171.915	3.2275	5.7219	0.0074	2.8777	-0.2041	0.8481	0.0901	0.1374	-0.1509	1.6682	0.0315	0.2636	6.5442	0.5994	8.1683	0.685	3.0188	21.137	2.1328	4.1027	0.011	2.129	-0.1764	0.734	0.1508	0.328	-0.0567	2.012	0.0185	0.354	20.3428	0.7757	45.3387	0.7289	5.6638
9-D	11482.7	3017.7	0.2181	0.5317	0	4.1499	0.0395	0.4023	15.3517	0.7946	37.3755	0.7568	4.5311	120.27	1.9658	3.5579	0.0146	1.9516	-0.2544	0.8001	0.0385	0.0766	-0.1351	1.4021	0.0145	0.5824	2.1504	0.5537	2.4092	0.8475	0.9959	6.7354	1.053	2.0946	0.0193	1.2568	-0.1834	0.5816	0.0968	0.2831	-0.0369	1.9747	0.0065	0.5832	11.9344	0.8174	32.6819	0.8409	3.5858
9-E	15667.7	1707.6	0.0975	0.2009	0	4.4229	0.0225	0.4802	4.3971	0.6272	5.8974	0.7986	1.862	16.755	1.4849	2.8185	0.0166	1.5725	-0.2253	0.7114	0.0535	0.1027	-0.0521	1.3628	0.0125	0.5082	3.2586	0.6274	4.3729	0.8099	1.6894	12.1808	1.4095	2.6548	0.0173	1.488	-0.2335	0.7068	0.0082	0.0543	-0.1243	1.7288	0	0.9363	0.925	0.6227	1.2256	0.9806	0.1549
8-A	2235.6	7221	0.1381	0.2611	0	3.4672	0.0215	0.4236	5.9898	0.7119	10.3933	0.7625	2.9483	29.7292	1.8383	3.3748	0.0149	1.794	-0.2724	0.8071	0.0795	0.1493	-0.0503	1.5348	0.0135	0.446	5.2941	0.7199	9.4497	0.7705	2.8116	27.0791	1.7833	3.246	0.0155	1.7366	-0.2774	0.8029	0.0081	0.0379	-0.0363	1.5222	0	0.9189	0.4949	0.5629	0.5661	0.9778	0.1117
8-B	4625.8	7112.4	0.2393	0.5157	0	4.1085	0.0405	0.3304	18.0155	0.7587	37.3309	0.7231	5.2312	114.485	2.3214	4.1338	0.013	2.1512	-0.2726	0.8505	0.0363	0.0788	-0.0889	1.1444	0.0095	0.588	2.0717	0.5853	2.4977	0.8526	1.023	7.1219	1.0627	2.0865	0.0197	1.2257	-0.2094	0.6164	0.1118	0.2657	-0.0309	1.9329	0.0105	0.4444	13.8075	0.7697	29.9752	0.786	4.1808
8-C	8060.1	6435.4	0.2478	0.383	0	4.0196	0.0725	0.2232	11.0275	0.7486	21.9352	0.6508	5.638	60.6251	2.7852	4.9218	0.0099	2.3553	-0.2789	0.891	0.1225	0.1803	-0.0631	1.5994	0.0335	0.2602	6.6218	0.7623	13.9261	0.6751	4.5528	37.8695	2.5083	4.4918	0.0108	2.1696	-0.2745	0.87	0.034	0.1242	-0.0447	1.7806	0.0065	0.7355	4.0075	0.6985	6.6458	0.9143	0.9519
8-D	11620.2	5559.7	0.1164	0.2209	0	3.5431	0.0335	0.4173	5.7572	0.6151	7.4791	0.7714	2.2266	20.8655	1.6679	3.1899	0.0151	1.7454	-0.2103	0.7227	0.0647	0.1164	-0.0524	1.3608	0.0195	0.4454	4.3414	0.6256	5.7974	0.7821	2.0275	16.0485	1.5801	3.0157	0.0157	1.6624	-0.2165	0.7169	0.0091	0.054	-0.0438	1.6267	0	0.9305	1.0191	0.5797	1.2123	0.9779	0.1797
8-E	15535.1	4571.2	0.1214	0.226	0	4.1219	0.0325	0.3938	5.1949	0.6487	7.3931	0.7588	2.3886	20.6893	1.7695	3.3283	0.0144	1.7739	-0.229	0.7559	0.0682	0.1136	-0.0895	1.3508	0.0195	0.4106	3.8187	0.6497	5.4501	0.7657	2.2064	14.7881	1.7016	3.2055	0.0148	1.7138	-0.2304	0.7485	0.0088	0.0658	-0.0467	1.8746	0	0.9472	1.2886	0.6437	1.808	0.9821	0.2016
7-A	2304	10317.9	0.1588	0.2537	0	3.9738	0.0615	0.2565	6.3367	0.6735	9.7026	0.6958	3.1737	26.9631	2.1504	4.1104	0.0112	2.0621	-0.2137	0.7869	0.0849	0.127	-0.1	1.1664	0.0295	0.3221	4.437	0.6823	6.9829	0.7231	2.7882	18.8692	1.9768	3.7369	0.0126	1.9133	-0.2295	0.7834	0.0157	0.0716	-0.0343	1.7867	0.0055	0.8859	1.4653	0.66	2.1547	0.9648	0.3005
7-B	5018.5	9922.7	0.0431	0.1614	0	3.7794	0	0.7885	2.2779	0.7063	3.878	0.9239	0.8712	12.5605	0.697	1.2605	0.0252	0.7673	-0.3284	0.6235	0.0232	0.0915	-0.0698	1.393	0	0.8115	2.0106	0.7082	3.4456	0.9303	0.799	11.1961	0.6502	1.1488	0.0257	0.7086	-0.3343	0.6063	0.0042	0.0213	-0.086	1.364	0	0.9541	0.136	0.5764	0.1605	0.9881	0.0466
7-C	8282.3	8512.7	0.3304	0.5573	0	4.2335	0.0965	0.1452	25.1024	0.7185	44.5779	0.5834	7.3637	129.229	3.1135	5.6068	0.0075	2.8	-0.1991	0.8375	0.0644	0.1126	-0.0995	1.351	0.0195	0.371	4.0745	0.6205	5.3679	0.7457	2.0198	14.8484	1.6804	3.292	0.0136	1.8069	-0.1713	0.6706	0.1407	0.2839	-0.0226	1.9386	0.0275	0.2863	18.108	0.7383	34.5996	0.6965	5.1702
7-D	11599	8386	0.1631	0.2209	0	3.5753	0.0725	0.1912	6.347	0.5917	7.7731	0.6519	3.1675	19.9115	2.2592	4.4255	0.0095	2.2139	-0.1634	0.7323	0.0968	0.1254	-0.0177	1.412	0.0435	0.1919	5.6443	0.597	7.0027	0.6554	3.11	17.7149	2.241	4.3894	0.0097	2.1827	-0.1686	0.7387	0.0069	0.0392	-0.0469	1.6091	0.0015	0.9438	0.5039	0.5928	0.6187	0.9831	0.1059
7-E	15494.5	7416.3	0.1336	0.2866	0	3.9738	0.0335	0.4187	7.7634	0.6631	11.5209	0.7591	2.6251	33.7047	1.7597	3.2991	0.0146	1.8337	-0.2108	0.731	0.0668	0.1185	-0.0915	1.3826	0.0185	0.4477	4.6112	0.6161	6.0059	0.773	2.1301	16.3138	1.6206	3.0563	0.0154	1.7083	-0.209	0.7099	0.0176	0.1085	-0.0425	1.7933	0.0015	0.902	2.8612	0.7114	4.9562	0.9653	0.5202
6-A	2528.2	13436.8	0.1282	0.2454	0	3.8075	0.0285	0.4185	5.8364	0.6818	9.1718	0.7679	2.6335	26.2106	1.7729	3.3086	0.0151	1.766	-0.2472	0.7761	0.0709	0.1335	-0.0518	1.5466	0.0155	0.4548	4.5735	0.6975	7.5588	0.7825	2.3992	21.6834	1.667	3.0885	0.0159	1.6642	-0.2572	0.7707	0.0103	0.0513	-0.0949	1.6878	0	0.8974	0.8357	0.6132	1.0801	0.9708	0.1884
6-B	5134.4	12742.3	0.4966	0.8122	0	4.4844	0.0965	0.141	27.0122	0.8368	82.7527	0.5901	10.9038	250.468	3.291	5.7309	0.0077	2.8012	-0.2547	0.8972	0.0648	0.1052	-0.109	1.4064	0.0245	0.3837	3.4794	0.6285	4.6827	0.754	1.9903	12.74	1.6562	3.224	0.014	1.7493	-0.1903	0.6944	0.2423	0.4324	-0.0259	2.105	0.0245	0.3189	22.3117	0.8532	75.9904	0.6921	9.3093
6-C	8146.7	11504.7	0.1006	0.2112	0	3.462	0.0105	0.4521	4.8259	0.6421	6.7418	0.7928	1.9984	19.3967	1.5266	2.9512	0.0162	1.6264	-0.2288	0.7272	0.0561	0.1166	-0.0253	1.428	0.0065	0.484	4.0244	0.6459	5.6817	0.8049	1.8269	16.3454	1.4404	2.7748	0.0169	1.5454	-0.2347	0.719	0.0077	0.0352	-0.0393	1.5208	0	0.9177	0.3957	0.5876	0.4797	0.977	0.1076
6-D	12093.5	11067.4	0.0818	0.1596	0	2.9522	0.0125	0.478	2.8109	0.6232	3.7297	0.8052	1.5324	10.4757	1.374	2.6916	0.0167	1.4961	-0.2189	0.6927	0.048	0.0923	-0.0356	1.2865	0.0085	0.503	2.4911	0.6394	3.4539	0.8152	1.4878	9.7486	1.3394	2.5818	0.0173	1.4341	-0.2345	0.7015	0.0039	0.0204	-0.0528	1.356	0	0.9632	0.144	0.4927	0.1419	0.9895	0.0369
6-E	15141	10350.4	0.177	0.3428	0	4.1219	0.0505	0.288	9.6959	0.6981	16.06	0.6909	3.6076	47.0572	2.1987	4.1184	0.0113	2.1621	-0.1996	0.7688	0.0804	0.124	-0.1542	1.3994	0.0245	0.3334	4.935	0.6264	6.6048	0.7181	2.6324	17.3152	1.9305	3.6749	0.0125	1.9511	-0.1939	0.7334	0.0312	0.144	-0.0462	1.8793	0.0045	0.7955	4.0545	0.7666	8.6838	0.93	0.9547
5-A	2500.3	16274.8	0.1379	0.2466	0	4.0761	0.0535	0.3166	5.6368	0.6913	9.1293	0.7484	2.665	26.6776	1.9142	3.6404	0.0135	1.8334	-0.2493	0.799	0.0715	0.1198	-0.07	1.299	0.0255	0.3796	3.8448	0.6888	6.1781	0.7696	2.2601	17.621	1.7337	3.2996	0.0147	1.7031	-0.2526	0.7797	0.0158	0.0745	-0.0319	1.7887	0.0055	0.9023	1.4774	0.6863	2.3543	0.9694	0.3102
5-B	5652.8	15571.2	0.0717	0.1763	0	4.2121	0.0315	0.649	3.469	0.6335	4.7327	0.8767	1.0595	14.564	0.9047	1.8361	0.0213	1.1256	-0.2169	0.5969	0.0343	0.0892	-0.1191	1.3288	0.0125	0.7448	2.5135	0.6293	3.3901	0.9033	0.877	10.3839	0.7862	1.4509	0.0237	0.9174	-0.2449	0.5738	0.011	0.0437	-0.1145	1.7039	0.0055	0.9291	0.6584	0.5805	0.7846	0.9809	0.1144
5-C	8940.5	14400	0.1338	0.2502	0	3.8867	0.0535	0.319	6.2843	0.6642	9.3578	0.7366	2.5188	27.3608	1.831	3.6037	0.013	1.8992	-0.2012	0.739	0.0671	0.1123	-0.0886	1.2736	0.0265	0.386	3.9599	0.636	5.4396	0.7643	2.0267	15.1769	1.6335	3.2127	0.0144	1.7309	-0.2074	0.7193	0.0175	0.0867	-0.0334	1.7206	0.0045	0.8888	1.9093	0.7011	3.194	0.9635	0.4119
5-D	12228.8	14240.7	0.0895	0.1953	0	3.8197	0.0245	0.4828	3.56	0.6769	5.5081	0.8146	1.6254	16.6207	1.375	2.6804	0.0171	1.4698	-0.2392	0.7153	0.0463	0.0887	-0.066	1.1516	0.0135	0.5272	2.1815	0.6627	3.2334	0.8316	1.3489	9.4316	1.2514	2.4266	0.0182	1.3432	-0.2483	0.7014	0.0103	0.0654	-0.0383	1.7724	0	0.9202	1.0612	0.7022	1.7816	0.9747	0.2327
5-E	15527	13570.8	0.113	0.2747	0	4.1731	0.0335	0.494	6.4071	0.6858	10.1959	0.8002	2.0837	31.257	1.4688	2.7972	0.0168	1.6078	-0.2156	0.6968	0.0529	0.1051	-0.0968	1.2357	0.0165	0.5405	3.517	0.6253	4.6924	0.82	1.5787	13.4091	1.3188	2.4974	0.018	1.446	-0.2196	0.674	0.0184	0.1069	-0.0344	1.9423	0.0025	0.885	2.456	0.7415	4.7501	0.9616	0.5025
4-A	2200.4	18852.6	0.1524	0.2513	0	3.8655	0.0555	0.276	6.0861	0.6831	9.6022	0.7075	3.0606	27.0318	2.0809	3.9854	0.0117	2.0143	-0.2224	0.7906	0.084	0.1282	-0.0427	1.4477	0.0315	0.3159	4.4382	0.6875	7.1016	0.7257	2.7477	19.4954	1.9549	3.7321	0.0126	1.9046	-0.2321	0.7865	0.0126	0.0668	-0.0345	1.6727	0.0015	0.9083	1.3076	0.6516	1.8766	0.9707	0.2636
4-B	4970.3	18469.7	0.2816	0.3834	0	3.7204	0.1135	0.1108	14.9331	0.6832	23.5706	0.5858	6.2219	64.6877	3.1145	5.6144	0.0075	2.659	-0.2044	0.8453	0.1235	0.1722	-0.0707	1.6226	0.0455	0.1927	8.7829	0.6687	13.255	0.637	4.2787	35.2155	2.5083	4.7392	0.0092	2.3659	-0.1924	0.792	0.0539	0.0962	-0.0278	1.695	0.0215	0.4103	2.5614	0.674	3.929	0.8121	1.5225
4-C	8709.9	17282.1	0.1054	0.218	0	3.3686	0.0225	0.4381	4.9293	0.6603	7.2561	0.7897	2.0517	21.2343	1.5366	3.0042	0.0159	1.6417	-0.2294	0.7324	0.0569	0.1162	-0.084	1.4008	0.0115	0.4783	3.8511	0.6608	5.6773	0.8054	1.8107	16.5548	1.4277	2.7801	0.0168	1.5386	-0.2355	0.7207	0.0099	0.0465	-0.0482	1.5616	0	0.9084	0.6389	0.6355	0.8763	0.973	0.1735
4-D	11618	17262.9	0.132	0.246	0	3.6892	0.0285	0.3674	5.6453	0.6901	9.1072	0.7463	2.7249	26.0704	1.86	3.5302	0.0137	1.8557	-0.2359	0.7789	0.0746	0.131	-0.0395	1.4515	0.0185	0.3853	4.3142	0.7018	7.2347	0.7559	2.5263	20.5087	1.7882	3.3907	0.0142	1.78	-0.2445	0.779	0.0092	0.0573	-0.0479	1.6341	0	0.922	1.005	0.6337	1.3719	0.9761	0.1941
4-E	15109.4	16454.2	0.1407	0.274	0	3.8611	0.0375	0.378	8.0295	0.6358	11.0245	0.7346	2.8116	30.9934	1.8751	3.5475	0.0134	1.9573	-0.1962	0.7288	0.0751	0.1274	-0.0641	1.5352	0.0225	0.4014	5.4312	0.6116	6.9907	0.7466	2.4411	18.6385	1.7671	3.3498	0.0141	1.852	-0.2	0.7202	0.014	0.0899	-0.0467	1.7446	0	0.9065	2.1206	0.6905	3.4253	0.9676	0.3925
3-A	2303.8	21828	0.2434	0.5249	0	4.4809	0.0595	0.2764	11.3115	0.8346	34.1953	0.7089	5.0659	110.48	2.328	4.249	0.0119	2.1236	-0.2689	0.8527	0.0738	0.1298	-0.0781	1.3526	0.0255	0.4059	4.4451	0.6961	7.3138	0.7678	2.3453	21.1858	1.7036	3.25	0.0148	1.7328	-0.2377	0.7594	0.0783	0.2603	-0.034	2.1043	0.0075	0.674	6.4426	0.8792	26.6549	0.8861	2.7435
3-B	5394	21270.3	0.1179	0.2786	0	4.0196	0.0285	0.4768	6.5201	0.6967	10.7483	0.7976	2.3124	32.6718	1.5434	2.9288	0.0166	1.6297	-0.2472	0.7465	0.0572	0.1213	-0.0807	1.3639	0.0125	0.5459	4.0775	0.6728	6.2303	0.8208	1.8487	18.2894	1.3765	2.5605	0.0182	1.4568	-0.2544	0.7218	0.0173	0.0923	-0.0306	1.7526	0.0025	0.8767	2.092	0.7079	3.5807	0.9617	0.4049
3-C	8551.4	20269.1	0.2232	0.3047	0	3.9527	0.1085	0.1093	9.2596	0.6737	14.1902	0.6064	4.7199	39.339	2.8596	5.2125	0.0081	2.4209	-0.1991	0.821	0.1161	0.1404	-0.0687	1.4025	0.0575	0.128	6.0856	0.6518	8.7376	0.6232	3.9698	22.6315	2.6265	4.8997	0.0086	2.2895	-0.1938	0.8	0.0251	0.0994	-0.0323	1.7564	0.0075	0.8162	2.5058	0.7031	4.2203	0.9401	0.6154
3-D	11698.3	20153	0.1754	0.3414	0	4.3718	0.0625	0.2615	9.6687	0.7025	16.2495	0.7044	3.592	48.1226	2.193	4.1463	0.0116	2.1058	-0.2261	0.8039	0.0817	0.1374	-0.6498	1.3108	0.0325	0.3214	5.4327	0.6614	8.0211	0.7329	2.7042	22.2774	1.9203	3.6934	0.0129	1.9127	-0.2251	0.7757	0.0289	0.1343	-0.0404	1.8134	0.0045	0.8198	4.1806	0.7253	7.6097	0.9385	0.8488
3-E	15223.4	19816.8	0.1371	0.2872	0	4.0348	0.0375	0.387	7.974	0.6602	11.7328	0.753	2.7187	34.1525	1.8154	3.4439	0.0142	1.8718	-0.2219	0.7558	0.0686	0.121	-0.0818	1.5047	0.0215	0.4193	4.6371	0.6299	6.2651	0.7703	2.1895	17.2373	1.6624	3.1729	0.0151	1.7271	-0.2267	0.7419	0.018	0.1024	-0.0411	1.8	0	0.8677	2.7616	0.6873	4.4157	0.9549	0.5275
2-A	2691.5	24759.4	0.1634	0.2687	0	3.9738	0.0555	0.2735	6.4103	0.7028	10.7843	0.6975	3.3363	30.4826	2.1803	4.1038	0.0114	2.0638	-0.2276	0.8033	0.0903	0.1335	-0.0696	1.3714	0.0325	0.2935	4.8746	0.6834	7.6977	0.7081	3.027	20.6642	2.0855	3.9332	0.0119	1.9863	-0.2301	0.7963	0.0132	0.0804	-0.0549	1.7557	0	0.9075	1.4215	0.7399	2.7321	0.9704	0.3286
2-B	5420.6	23826.6	0.2351	0.4311	0	4.1499	0.0555	0.2741	13.5387	0.7656	28.8742	0.6818	5.1412	86.7249	2.4529	4.5002	0.011	2.2871	-0.2446	0.8407	0.0572	0.0932	-0.0823	1.3061	0.0215	0.4172	2.8201	0.6152	3.664	0.7855	1.6654	10.0265	1.5056	2.9562	0.0154	1.5857	-0.2151	0.7073	0.0891	0.2006	-0.0336	1.8333	0.0095	0.4798	7.7084	0.7784	17.3923	0.7972	3.265
2-D	11673.1	23015.7	0.1542	0.246	0	3.3075	0.0575	0.2732	6.7666	0.6413	9.4331	0.7032	3.1279	25.465	2.1018	4.0357	0.0116	2.0699	-0.2121	0.7816	0.0904	0.1426	-0.0928	1.4181	0.0345	0.2863	6.1423	0.6516	8.8154	0.7098	3.0341	23.8515	2.0591	3.9471	0.0119	2.0291	-0.2192	0.785	0.0076	0.0298	-0.0615	1.5118	0	0.9224	0.3066	0.5346	0.3294	0.9791	0.0748
2-E	15185.3	23110.8	0.1265	0.2446	0	4.0708	0.0395	0.4028	6.2498	0.6497	8.9203	0.7597	2.44	25.5038	1.7135	3.3032	0.0144	1.8122	-0.2135	0.7351	0.0706	0.1245	-0.0659	1.4704	0.0245	0.4295	4.7527	0.6451	6.6958	0.7717	2.2252	18.6934	1.6396	3.1394	0.0151	1.7243	-0.2246	0.7367	0.0096	0.0645	-0.0543	1.7357	0	0.9219	1.1391	0.6718	1.7352	0.9752	0.2148
1-A	3059.5	27231.3	0.245	0.4105	0	4.1499	0.0815	0.158	15.3994	0.6941	25.1708	0.6071	5.1504	72.9428	2.7123	5.1068	0.0081	2.5758	-0.1722	0.7795	0.0799	0.1177	-0.1673	1.5197	0.0345	0.2754	5.0864	0.5877	6.1676	0.7059	2.4	16.3982	1.8983	3.7895	0.0116	1.9968	-0.1632	0.6925	0.0733	0.1822	-0.0315	1.8414	0.0125	0.4548	7.3215	0.7428	14.2347	0.7914	2.4893
1-B	5717.4	26780.4	0.0697	0.1867	0	3.7945	0	0.6288	2.9751	0.71	5.1299	0.8694	1.3444	16.1097	1.102	2.0483	0.021	1.1548	-0.2994	0.715	0.0386	0.1009	-0.0285	1.7182	0	0.6545	2.4467	0.7084	4.1949	0.8762	1.2344	13.1008	1.0442	1.9228	0.0215	1.0986	-0.3017	0.7016	0.0055	0.0387	-0.0495	1.6179	0	0.9553	0.4181	0.6576	0.6105	0.987	0.0935
1-E	14821.2	26688.1	0.1304	0.2262	0	3.7802	0.0505	0.3331	5.2055	0.6672	7.8201	0.7427	2.478	22.3584	1.8344	3.5562	0.0133	1.8486	-0.2224	0.7636	0.0731	0.1157	-0.0514	1.2777	0.0295	0.3492	3.7969	0.6716	5.7815	0.7521	2.2695	16.169	1.7588	3.4193	0.0137	1.775	-0.2281	0.7611	0.0095	0.0646	-0.0409	1.6821	0	0.9358	1.2092	0.6561	1.7582	0.9783	0.2345
[truncated: 124 more columns]

## Sheet: RPX3
Name	Centroid X µm	Centroid Y µm	OD Sum: Mean	OD Sum: Std.dev.	OD Sum: Min	OD Sum: Max	OD Sum: Median	OD Sum: Haralick Angular second moment (F0)	OD Sum: Haralick Contrast (F1)	OD Sum: Haralick Correlation (F2)	OD Sum: Haralick Sum of squares (F3)	OD Sum: Haralick Inverse difference moment (F4)	OD Sum: Haralick Sum average (F5)	OD Sum: Haralick Sum variance (F6)	OD Sum: Haralick Sum entropy (F7)	OD Sum: Haralick Entropy (F8)	OD Sum: Haralick Difference variance (F9)	OD Sum: Haralick Difference entropy (F10)	OD Sum: Haralick Information measure of correlation 1 (F11)	OD Sum: Haralick Information measure of correlation 2 (F12)	Hematoxylin: Mean	Hematoxylin: Std.dev.	Hematoxylin: Min	Hematoxylin: Max	Hematoxylin: Median	Hematoxylin: Haralick Angular second moment (F0)	Hematoxylin: Haralick Contrast (F1)	Hematoxylin: Haralick Correlation (F2)	Hematoxylin: Haralick Sum of squares (F3)	Hematoxylin: Haralick Inverse difference moment (F4)	Hematoxylin: Haralick Sum average (F5)	Hematoxylin: Haralick Sum variance (F6)	Hematoxylin: Haralick Sum entropy (F7)	Hematoxylin: Haralick Entropy (F8)	Hematoxylin: Haralick Difference variance (F9)	Hematoxylin: Haralick Difference entropy (F10)	Hematoxylin: Haralick Information measure of correlation 1 (F11)	Hematoxylin: Haralick Information measure of correlation 2 (F12)	DAB: Mean	DAB: Std.dev.	DAB: Min	DAB: Max	DAB: Median	DAB: Haralick Angular second moment (F0)	DAB: Haralick Contrast (F1)	DAB: Haralick Correlation (F2)	DAB: Haralick Sum of squares (F3)	DAB: Haralick Inverse difference moment (F4)	DAB: Haralick Sum average (F5)
1-C	5463.6	3987.2	0.1781	0.2912	0	4.1912	0.0575	0.2744	9.2003	0.651	13.1821	0.6816	3.6612	35.8847	2.2134	4.2227	0.0109	2.2154	-0.1943	0.7682	0.0981	0.1599	-0.0348	1.5763	0.0275	0.3287	7.8486	0.6499	11.2091	0.7032	3.3615	30.1268	2.085	3.9271	0.0121	2.1029	-0.2019	0.7611	0.015	0.0582	-0.052	1.6298	0.0065	0.8798	0.9805	0.657	1.4292	0.9659	0.2138
1-B	9517.9	3761.6	0.1057	0.2287	0	3.9871	0.0175	0.4894	5.3909	0.6572	7.8623	0.8042	2.095	22.9246	1.513	2.8508	0.017	1.5778	-0.2583	0.753	0.0555	0.1221	-0.0301	1.3505	0.0015	0.5385	4.4121	0.6454	6.2205	0.8188	1.8715	17.8701	1.4065	2.6082	0.0181	1.4759	-0.2586	0.7317	0.0117	0.0487	-0.0377	1.572	0.0045	0.9248	0.7061	0.6415	0.9847	0.9778	0.1543
1-A	13355.2	2958.1	0.1229	0.256	0	4.1534	0.0315	0.4456	5.919	0.6819	9.3039	0.7775	2.4069	27.3162	1.6646	3.1205	0.0155	1.7122	-0.2387	0.7518	0.063	0.1226	-0.0951	1.444	0.0145	0.4939	4.2884	0.6624	6.351	0.7949	2.0753	18.0393	1.5368	2.847	0.0167	1.5911	-0.2385	0.7292	0.015	0.0759	-0.0352	1.7747	0.0045	0.9103	1.4313	0.7087	2.4566	0.9719	0.297
2-C	5712.7	7736.8	0.149	0.2897	0	4.2046	0.0485	0.3439	7.8641	0.6777	12.1985	0.7375	2.9757	35.4365	1.9389	3.6806	0.0133	1.9425	-0.2263	0.7768	0.0735	0.1323	-0.1164	1.6303	0.0205	0.4235	5.2835	0.6478	7.5	0.7651	2.4297	20.7639	1.7287	3.2442	0.015	1.7666	-0.2291	0.7498	0.0211	0.0904	-0.0365	1.6948	0.0075	0.857	2.0233	0.713	3.5251	0.956	0.4507
2-B	9688.4	7009.7	0.1271	0.2669	0	3.9996	0.0355	0.4152	6.8961	0.6636	10.2498	0.7678	2.5033	29.9198	1.726	3.266	0.0149	1.784	-0.2337	0.7574	0.0636	0.1253	-0.0314	1.472	0.0145	0.4782	4.8113	0.638	6.6448	0.7889	2.0991	18.6662	1.5672	2.926	0.0163	1.6386	-0.2333	0.73	0.017	0.0779	-0.0371	1.6432	0.0065	0.8897	1.7139	0.6705	2.6007	0.9659	0.327
2-A	13507.1	6114.3	0.1576	0.2852	0	4.1019	0.0415	0.3454	8.2583	0.6596	12.1304	0.7137	3.2374	33.7514	2.02	3.8072	0.0125	2.058	-0.1994	0.7506	0.0844	0.1465	-0.1934	1.4096	0.0195	0.3939	6.4782	0.649	9.2282	0.733	2.9043	24.9521	1.8979	3.5217	0.0136	1.9352	-0.2041	0.7379	0.0156	0.0745	-0.0425	1.6911	0.0055	0.9065	1.487	0.6867	2.3729	0.9705	0.2841
3-C	6042.4	11065.9	0.1161	0.2436	0	3.7423	0.0245	0.4524	5.7932	0.6729	8.8544	0.7848	2.3352	25.8459	1.6152	3.066	0.0159	1.6848	-0.2429	0.7533	0.0617	0.1274	-0.0592	1.3584	0.0095	0.5082	4.4909	0.6711	6.8266	0.8037	2.0793	19.6824	1.5027	2.7877	0.0172	1.5568	-0.2544	0.7432	0.0121	0.0555	-0.0412	1.6362	0.0025	0.9094	0.8917	0.6551	1.2927	0.9736	0.1841
3-B	9897.8	10386.4	0.1453	0.2764	0	4.2082	0.0395	0.354	6.6945	0.698	11.084	0.7443	3.0023	32.028	1.9758	3.6544	0.0137	1.8839	-0.2662	0.8187	0.0751	0.1328	-0.0515	1.6382	0.0185	0.4058	4.6837	0.686	7.4581	0.7628	2.5625	20.845	1.811	3.3425	0.0148	1.7581	-0.2644	0.7964	0.0171	0.0786	-0.0384	1.6298	0.0045	0.8814	1.7067	0.6772	2.6436	0.963	0.3572
3-A	13649.8	9466	0.1501	0.2685	0	4.3295	0.0425	0.3495	7.651	0.6491	10.902	0.7182	3.0396	30.1851	1.9593	3.7324	0.0126	2.0295	-0.1963	0.7416	0.0803	0.1416	-0.0821	1.5852	0.0185	0.4048	6.1403	0.6428	8.5957	0.7407	2.7353	23.3238	1.839	3.4269	0.0139	1.8939	-0.2058	0.7336	0.0149	0.0605	-0.0458	1.6784	0.0065	0.8808	1.0501	0.659	1.5396	0.9651	0.2294
4-C	6270.9	14089.5	0.1184	0.2444	0	4.1455	0.0335	0.4267	5.9579	0.6604	8.7728	0.7794	2.3326	25.4682	1.6666	3.1636	0.0155	1.7113	-0.2438	0.7617	0.0615	0.1206	-0.0776	1.4846	0.0155	0.4839	4.3771	0.643	6.131	0.798	2.0098	17.2897	1.5272	2.8642	0.0167	1.5852	-0.2466	0.7408	0.0136	0.0661	-0.0529	1.6697	0.0035	0.9112	1.2259	0.6708	1.8616	0.9725	0.2468
4-B	9995.7	13236.3	0.1033	0.2612	0	4.2046	0.0215	0.5115	6.0767	0.6762	9.3817	0.8145	2.0003	28.5358	1.4325	2.7065	0.0176	1.5298	-0.25	0.731	0.0484	0.1087	-0.1993	1.4161	0.0085	0.576	3.7378	0.6205	4.924	0.8355	1.5403	14.1489	1.2608	2.3532	0.0191	1.3676	-0.245	0.6907	0.0172	0.0885	-0.0287	1.7009	0.0025	0.8878	1.9682	0.7072	3.3608	0.9641	0.4063
4-A	14224.7	12622	0.177	0.3079	0	4.3015	0.0495	0.3067	9.4246	0.6623	13.9537	0.6914	3.6706	38.4074	2.1824	4.0965	0.0115	2.1713	-0.2037	0.7734	0.0943	0.1547	-0.1163	1.6143	0.0225	0.3554	7.1969	0.6532	10.3751	0.7114	3.2726	27.6371	2.0461	3.7956	0.0126	2.0455	-0.2071	0.7596	0.0181	0.083	-0.0554	1.6552	0.0065	0.8822	1.9176	0.6758	2.9576	0.9631	0.3501
5-C	6458.9	17434	0.1417	0.2603	0	4.1077	0.0405	0.3508	6.823	0.6613	10.0722	0.7312	2.8878	28.2691	1.9297	3.6665	0.0131	1.9524	-0.2185	0.7663	0.0759	0.1324	-0.05	1.361	0.0205	0.4006	5.2295	0.6495	7.4604	0.751	2.5571	20.3386	1.7986	3.3781	0.0142	1.8278	-0.2259	0.7557	0.0139	0.0652	-0.035	1.6381	0.0035	0.8878	1.1023	0.6928	1.7941	0.9667	0.2487
5-B	10365.8	16412	0.1469	0.2539	0	3.9773	0.0485	0.3418	6.4641	0.6707	9.8142	0.7346	2.9786	27.3316	1.9741	3.7155	0.0132	1.9311	-0.2455	0.8016	0.0816	0.1391	-0.3083	1.553	0.0235	0.3891	5.4667	0.6716	8.3224	0.7509	2.7531	22.9234	1.8652	3.474	0.0142	1.8375	-0.2513	0.7922	0.0117	0.051	-0.0449	1.6121	0.0045	0.9213	0.7769	0.6426	1.0869	0.9772	0.1535
5-A	14301.5	15522.9	0.1375	0.3063	0	4.1534	0.0335	0.4201	6.9287	0.7343	13.0397	0.7825	2.8155	39.8878	1.7794	3.2811	0.0157	1.7115	-0.2856	0.8132	0.0657	0.1343	-0.035	1.4882	0.0125	0.5014	4.3975	0.7119	7.6317	0.8075	2.2372	22.5252	1.5688	2.8488	0.0174	1.5331	-0.2869	0.7817	0.0213	0.1006	-0.039	1.6946	0.0045	0.8694	2.4227	0.7206	4.3347	0.9597	0.4977
6-C	6525.2	20128.1	0.1602	0.2856	0	4.0663	0.0495	0.3077	8.5054	0.6496	12.1353	0.6993	3.2697	33.7174	2.0985	3.9816	0.0117	2.1208	-0.1942	0.7542	0.0832	0.135	-0.2433	1.5002	0.0245	0.3511	6.0328	0.6155	7.8446	0.7193	2.7935	20.5294	1.9437	3.6731	0.0127	1.9845	-0.1964	0.7377	0.0184	0.0856	-0.0419	1.6464	0.0045	0.8686	1.8093	0.7123	3.1438	0.9578	0.4105
6-B	10202.2	19774.4	0.1221	0.2848	0	4.2667	0.0355	0.4744	7.638	0.6617	11.288	0.7879	2.3178	33.706	1.5562	2.9568	0.0161	1.6939	-0.2124	0.7063	0.0575	0.1187	-0.0437	1.3794	0.0145	0.5356	4.5001	0.6249	5.999	0.811	1.8217	17.0404	1.3983	2.6066	0.0177	1.5155	-0.2176	0.682	0.0198	0.0973	-0.0255	1.6794	0.0055	0.8754	2.5418	0.6884	4.078	0.9597	0.4609
6-A	14374.1	18275.3	0.252	0.3881	0	4.2881	0.0925	0.1459	13.0624	0.6993	21.7228	0.616	5.3827	61.2808	2.842	5.1923	0.0085	2.5153	-0.2109	0.8361	0.1283	0.1836	-0.0896	1.5719	0.0425	0.213	9.684	0.6781	15.0427	0.6421	4.5245	40.1047	2.5552	4.7416	0.0095	2.3771	-0.2079	0.8122	0.0314	0.1198	-0.0485	1.6927	0.0125	0.7823	3.3529	0.73	6.2086	0.9368	0.7359
7-B	10627.7	23384.8	0.0984	0.2464	0	4.0022	0.0175	0.5098	6.2191	0.6332	8.4772	0.8081	1.8924	25.0898	1.4015	2.6913	0.0172	1.5672	-0.2068	0.6758	0.0489	0.1109	-0.0822	1.3227	0.0055	0.5606	4.1457	0.5955	5.1238	0.8259	1.571	14.4908	1.2817	2.4222	0.0185	1.4313	-0.2125	0.6575	0.0135	0.0771	-0.036	1.6883	0.0015	0.9101	1.6422	0.6761	2.5352	0.9719	0.2814
7-A	14262.7	21256.6	0.2742	0.4522	0	4.4175	0.0905	0.1432	14.4383	0.7332	27.0537	0.6099	5.8635	78.6308	2.888	5.2787	0.0082	2.557	-0.2143	0.8437	0.123	0.1767	-0.0775	1.5622	0.0405	0.2295	8.5758	0.6916	13.903	0.6524	4.3031	37.321	2.4719	4.6056	0.0098	2.3114	-0.2113	0.8099	0.0505	0.1669	-0.026	1.9348	0.0145	0.6344	4.9847	0.7884	11.777	0.8794	1.4571
8-B	10649.4	26709.8	0.1424	0.2982	0	4.0508	0.0355	0.3892	9.0363	0.6446	12.712	0.747	2.9098	36.2838	1.8613	3.5085	0.014	1.9228	-0.2171	0.7543	0.0729	0.1384	-0.1863	1.4678	0.0175	0.4325	6.1664	0.6226	8.1695	0.7642	2.4656	22.3973	1.7186	3.2304	0.015	1.7938	-0.2184	0.736	0.0173	0.0904	-0.0432	1.7313	0.0035	0.8813	2.3729	0.6614	3.504	0.9618	0.4065
8-A	14373.4	24907.4	0.2047	0.3052	0	4.3295	0.0775	0.1961	9.0244	0.6883	14.4765	0.6575	4.2473	39.9127	2.4798	4.6587	0.0098	2.2873	-0.2193	0.8227	0.1127	0.1668	-0.1278	1.4981	0.0375	0.2648	7.7677	0.6868	12.3994	0.6814	3.8592	33.507	2.2884	4.3028	0.0109	2.1851	-0.2229	0.8089	0.0172	0.0629	-0.0534	1.9098	0.0085	0.8681	1.1524	0.6562	1.6758	0.9639	0.2423
[truncated: 124 more columns]
