# Supplementary material for: Evaluation of automatic discrimination between benign and malignant prostate tissue in the era of high precision digital pathology
Source: BMC Bioinformatics. 2023 Jan 3;24:1. doi: 10.1186/s12859-022-05124-9 (PMC9809030; doi:10.1186/s12859-022-05124-9)
Supplement: Supplementary file 4 — Additional file 4: Feature values for H&E stain. [file 12859_2022_5124_MOESM4_ESM.xlsx]

## Sheet: RPX1
Name	Centroid X µm	Centroid Y µm	OD Sum: Mean	OD Sum: Std.dev.	OD Sum: Min	OD Sum: Max	OD Sum: Median	OD Sum: Haralick Angular second moment (F0)	OD Sum: Haralick Contrast (F1)	OD Sum: Haralick Correlation (F2)	OD Sum: Haralick Sum of squares (F3)	OD Sum: Haralick Inverse difference moment (F4)	OD Sum: Haralick Sum average (F5)	OD Sum: Haralick Sum variance (F6)	OD Sum: Haralick Sum entropy (F7)	OD Sum: Haralick Entropy (F8)	OD Sum: Haralick Difference variance (F9)	OD Sum: Haralick Difference entropy (F10)	OD Sum: Haralick Information measure of correlation 1 (F11)	OD Sum: Haralick Information measure of correlation 2 (F12)	Hematoxylin: Mean	Hematoxylin: Std.dev.	Hematoxylin: Min	Hematoxylin: Max	Hematoxylin: Median	Hematoxylin: Haralick Angular second moment (F0)	Hematoxylin: Haralick Contrast (F1)	Hematoxylin: Haralick Correlation (F2)	Hematoxylin: Haralick Sum of squares (F3)	Hematoxylin: Haralick Inverse difference moment (F4)	Hematoxylin: Haralick Sum average (F5)	Hematoxylin: Haralick Sum variance (F6)	Hematoxylin: Haralick Sum entropy (F7)	Hematoxylin: Haralick Entropy (F8)	Hematoxylin: Haralick Difference variance (F9)	Hematoxylin: Haralick Difference entropy (F10)	Hematoxylin: Haralick Information measure of correlation 1 (F11)	Hematoxylin: Haralick Information measure of correlation 2 (F12)	Eosin: Mean	Eosin: Std.dev.	Eosin: Min	Eosin: Max	Eosin: Median	Eosin: Haralick Angular second moment (F0)	Eosin: Haralick Contrast (F1)	Eosin: Haralick Correlation (F2)	Eosin: Haralick Sum of squares (F3)	Eosin: Haralick Inverse difference moment (F4)	Eosin: Haralick Sum average (F5)
1-E	2513.1	2512.3	0.5526	0.4434	0	3.5176	0.5385	0.0454	16.41	0.7333	30.7606	0.4875	13.3381	70.5531	4.1698	6.9333	0.0052	2.9311	-0.2299	0.9113	0.1794	0.2013	-0.185	1.794	0.1175	0.0673	10.283	0.7098	17.7198	0.5759	6.8344	48.5257	3.5363	5.9537	0.0073	2.5582	-0.2386	0.892	0.1887	0.1445	-0.1814	1.2776	0.1905	0.0573	3.6577	0.7919	8.7888	0.5964	7.2354
1-D	6394.4	2241.7	0.52	0.3943	0	3.8126	0.5395	0.0554	8.9823	0.8132	24.0406	0.5452	12.5313	52.8389	3.9374	6.3671	0.0067	2.5652	-0.2844	0.9354	0.122	0.1565	-0.1806	2.2646	0.0745	0.1121	5.2469	0.7529	10.6155	0.6575	4.3593	30.6235	2.8024	4.9353	0.0097	2.1257	-0.2555	0.8702	0.2321	0.1602	-0.2974	1.2044	0.2585	0.0626	2.4511	0.8855	10.7069	0.6363	9.1207
1-C	9158.8	1914.9	0.5721	0.5742	0	3.796	0.4685	0.0815	20.5593	0.7998	51.346	0.4822	13.8943	127.997	4.1895	7.0314	0.0051	3.0586	-0.2569	0.933	0.1919	0.2332	-0.2681	1.6754	0.1185	0.0994	12.2412	0.7413	23.6578	0.5633	7.46	64.132	3.4865	5.9481	0.0069	2.6595	-0.2479	0.8997	0.1864	0.1806	-0.2148	1.7845	0.1625	0.0961	4.6775	0.8304	13.7923	0.5994	7.2145
1-B	12672.5	1810.8	0.6687	0.5503	0	3.6145	0.6425	0.0391	24.859	0.7361	47.0973	0.4377	16.27	111.192	4.5174	7.5515	0.0042	3.2114	-0.2142	0.9098	0.1428	0.2236	-0.2464	1.6157	0.0535	0.1602	12.7461	0.6978	21.0876	0.6092	5.5241	57.7636	2.8445	5.2363	0.0082	2.542	-0.1969	0.8188	0.3134	0.2389	-0.2341	1.6195	0.3085	0.0435	9.5538	0.8076	24.8265	0.4757	12.5579
1-A	15724.5	1593	0.5135	0.3397	0	3.6309	0.4995	0.0203	13.1517	0.6419	18.3658	0.457	12.2205	44.7682	4.2624	6.9725	0.0052	2.837	-0.171	0.8465	0.1308	0.1574	-0.2145	2.0655	0.0825	0.0713	8.7965	0.5983	10.9482	0.5827	4.6112	29.5113	2.955	5.3444	0.0077	2.4355	-0.1497	0.7524	0.2156	0.1299	-0.2475	1.5142	0.2245	0.0276	3.7233	0.7471	7.3604	0.5339	8.265
2-E	2396.4	5499.6	0.587	0.5211	0	3.3404	0.5435	0.0645	15.5733	0.8172	42.5861	0.4877	14.2677	102.153	4.2466	7.0328	0.0052	2.9388	-0.2634	0.937	0.1632	0.2203	-0.2458	1.5189	0.0805	0.1323	10.066	0.7583	20.8231	0.6065	6.2811	57.4857	3.1211	5.49	0.0081	2.4882	-0.2455	0.8831	0.2323	0.1962	-0.3281	1.2788	0.2235	0.0728	4.4923	0.863	16.3982	0.58	9.1463
2-D	6132	5507.1	0.7016	0.4708	0	3.682	0.6335	0.0113	25.349	0.6387	35.0784	0.3585	17.0243	90.1523	4.8411	8.0212	0.0034	3.3389	-0.1439	0.8349	0.2206	0.2199	-0.1876	2.3899	0.1465	0.0285	16.4353	0.6181	21.5197	0.4557	8.4928	58.1668	3.992	6.8061	0.0048	2.9886	-0.1417	0.7937	0.2484	0.1532	-0.5062	1.3112	0.2415	0.0215	5.3185	0.7424	10.3242	0.5054	9.6729
3-E	2354.1	8690.1	0.5786	0.5104	0	3.8706	0.5255	0.0344	32.8979	0.5927	40.3849	0.4131	13.95	93.0204	4.4086	7.536	0.0037	3.3712	-0.1658	0.8581	0.1631	0.246	-0.2502	2.5092	0.0705	0.1348	21.4078	0.5863	25.8737	0.5603	6.3706	65.5266	3.1392	5.7174	0.0069	2.8475	-0.164	0.7946	0.2257	0.1808	-0.6153	1.2485	0.2125	0.0425	8.4472	0.6996	14.0594	0.4764	8.8037
3-D	6711.7	8890.5	0.5028	0.4053	0	3.324	0.4595	0.0364	14.6619	0.7165	25.8635	0.515	12.0161	65.363	4.1473	6.7293	0.006	2.7751	-0.2348	0.9094	0.1388	0.2074	-0.2231	1.7114	0.0655	0.1106	11.9628	0.6859	19.0413	0.6166	5.0053	54.853	2.8378	5.224	0.0084	2.4548	-0.1863	0.8053	0.1993	0.1378	-0.2417	1.1679	0.2075	0.0458	2.9757	0.815	8.0406	0.5955	7.6532
3-C	9616.7	8690.1	0.531	0.4737	0	3.7018	0.4855	0.0377	19.928	0.7116	34.5456	0.4385	12.7245	86.5182	4.3042	7.2494	0.0044	3.1028	-0.1946	0.8829	0.1726	0.2136	-0.235	1.714	0.1035	0.0708	12.6331	0.6841	19.9933	0.5332	6.5305	54.7446	3.4099	6.0385	0.0063	2.7154	-0.1786	0.8247	0.1815	0.1515	-0.3825	1.4787	0.1675	0.0541	4.8408	0.7539	9.8336	0.552	6.892
3-B	13072.7	8264.4	0.5865	0.5758	0	4.0568	0.5455	0.1065	17.4783	0.8296	51.2745	0.5237	14.3102	119.289	4.004	6.7072	0.006	2.9037	-0.2786	0.9395	0.1633	0.2379	-0.2432	2.6032	0.0525	0.1927	10.9095	0.7681	23.5227	0.6154	6.4729	63.5033	3.0044	5.297	0.0087	2.4927	-0.2482	0.8784	0.2324	0.2334	-0.4963	1.6862	0.1875	0.1222	5.3719	0.8845	23.2644	0.6012	9.2373
3-A	16729.1	8715.2	0.626	0.5343	0	3.7951	0.5235	0.0166	29.2153	0.6622	43.2377	0.3929	15.0152	118.132	4.7108	7.7514	0.0037	3.3155	-0.1634	0.8596	0.1687	0.2257	-0.2618	2.3262	0.0975	0.0632	15.5966	0.6479	22.1501	0.5396	6.3952	61.7367	3.367	5.9824	0.0064	2.7481	-0.1598	0.7979	0.2535	0.1955	-1.253	1.6426	0.2275	0.0232	9.7588	0.7105	16.8541	0.4513	9.9077
4-E	2216.3	11625.2	0.5061	0.4433	0	3.9349	0.4945	0.0624	11.9135	0.804	30.386	0.5145	12.1837	72.9064	4.0403	6.6492	0.0059	2.7452	-0.2684	0.9318	0.0602	0.1915	-0.2817	2.3824	0	0.4735	6.8034	0.7581	14.0612	0.7874	2.883	43.5331	1.7006	3.1148	0.0162	1.6954	-0.2565	0.7714	0.293	0.2317	-0.3072	1.53	0.2955	0.0649	5.2599	0.8859	23.0418	0.5546	11.7424
4-D	6287.9	11993.4	0.8928	0.6038	0	3.8779	0.8175	0.009	36.075	0.6811	56.5587	0.3102	21.8346	146.277	5.2006	8.6787	0.0025	3.6251	-0.1433	0.8528	0.3337	0.2903	-0.2179	2.1013	0.2515	0.0178	25.3746	0.663	37.6494	0.3769	13.3178	99.9597	4.6043	7.8232	0.0034	3.3436	-0.1496	0.8407	0.2567	0.1606	-0.2906	1.3451	0.2595	0.0209	6.2881	0.723	11.3488	0.4791	10.0228
4-C	9576.9	11672.9	0.4292	0.5084	0	3.4875	0.3025	0.1166	18.6618	0.7681	40.2353	0.5435	10.2986	104.837	3.755	6.3582	0.0065	2.8517	-0.2623	0.9217	0.149	0.2309	-0.2536	1.7231	0.0615	0.1639	13.5093	0.708	23.1348	0.6199	5.689	64.8273	2.9314	5.2401	0.0086	2.5177	-0.2229	0.8519	0.1353	0.1504	-0.3686	1.1903	0.0995	0.143	3.2358	0.8281	9.4097	0.6595	5.0868
4-B	12732.5	11248.4	0.6345	0.5459	0	3.8284	0.5485	0.0389	22.3813	0.7613	46.8889	0.422	15.4118	117.504	4.5572	7.6203	0.004	3.218	-0.2176	0.9162	0.2038	0.2372	-0.2018	1.5344	0.1165	0.0677	14.6651	0.703	24.6843	0.5128	7.8803	66.1207	3.6328	6.3574	0.0057	2.852	-0.1908	0.8548	0.2193	0.1836	-0.1645	1.9877	0.1995	0.0504	4.8434	0.8336	14.5562	0.5496	8.532
4-A	16802	11520	0.5141	0.4487	0	3.2677	0.4835	0.0546	14.6403	0.7681	31.5698	0.4973	12.3742	75.7511	4.1486	6.911	0.0054	2.8857	-0.2427	0.9205	0.1736	0.2182	-0.1857	1.6268	0.0905	0.1042	10.5841	0.7445	20.7125	0.576	6.6253	56.5244	3.291	5.784	0.0073	2.5882	-0.2309	0.8794	0.1683	0.153	-0.2265	1.0438	0.1365	0.075	2.8144	0.8586	9.9536	0.6291	6.3728
5-E	2103.7	14926	0.7377	0.5405	0	3.9637	0.6425	0.0129	35.1159	0.6045	44.3964	0.382	17.8582	114.816	4.8807	7.9787	0.0035	3.4361	-0.1529	0.8502	0.1883	0.2744	-0.3236	2.6816	0.0845	0.0903	25.6625	0.6006	32.126	0.5156	7.4366	83.5727	3.413	6.1929	0.0057	3.0427	-0.1437	0.7774	0.3109	0.1914	-0.9836	1.6038	0.3125	0.0168	6.9109	0.7859	16.136	0.4729	12.3492
5-D	6586.5	15026.1	0.5246	0.5633	0	3.7236	0.4015	0.0915	21.7528	0.7794	49.3002	0.4942	12.692	125.025	4.072	6.8977	0.0053	3.051	-0.2449	0.922	0.1139	0.2328	-0.2959	1.7564	0.0055	0.2947	13.2212	0.7002	22.0511	0.6777	4.7095	62.1041	2.4089	4.4079	0.0111	2.3114	-0.2056	0.7937	0.244	0.2427	-0.2769	1.6729	0.2015	0.0946	7.9001	0.8444	25.3911	0.5469	9.6963
5-C	9516.6	14124.6	0.471	0.533	0	3.6288	0.3815	0.079	31.9594	0.6311	43.3146	0.5078	11.2457	105.578	3.9594	6.6684	0.0055	3.101	-0.2329	0.9079	0.1636	0.2563	-0.189	1.9264	0.0715	0.1323	23.2472	0.5973	28.8652	0.5967	6.2382	76.6459	3.0979	5.5389	0.0078	2.7249	-0.1978	0.8355	0.1473	0.1398	-0.2906	1.1339	0.1345	0.0987	4.6896	0.7095	8.0723	0.6115	5.5566
5-B	13097.8	14425.1	0.5181	0.4017	0	3.6045	0.5385	0.0516	11.3112	0.7746	25.088	0.5216	12.4738	55.047	4.0195	6.6051	0.0061	2.7043	-0.2548	0.9223	0.0939	0.1717	-0.2202	2.1549	0.0235	0.2669	7.1448	0.7055	12.132	0.6853	3.5427	34.398	2.2435	4.2231	0.011	2.1457	-0.2014	0.7778	0.2641	0.1962	-0.2673	1.1475	0.2835	0.0562	3.6366	0.8894	16.4335	0.5814	10.4758
5-A	16979.5	14099.5	0.4674	0.4841	0	3.2874	0.3775	0.0896	17.6596	0.7593	36.6792	0.4993	11.2429	89.938	3.9337	6.7117	0.0055	2.9591	-0.2396	0.9139	0.1586	0.2149	-0.2337	1.5674	0.0865	0.1297	11.618	0.708	19.8966	0.5868	6.079	53.6716	3.1486	5.5582	0.0076	2.5749	-0.2199	0.8609	0.1517	0.1692	-0.2732	1.7044	0.1125	0.1097	4.3485	0.8217	12.1923	0.6135	5.7368
6-E	2435.9	17892.6	0.5604	0.5169	0	3.534	0.4905	0.0506	21.1724	0.7464	41.7456	0.5135	13.5299	106.009	4.2745	6.9689	0.0057	2.9537	-0.2581	0.9321	0.1313	0.2713	-0.3308	2.0073	0.0045	0.2964	16.6245	0.7154	29.2051	0.6656	5.7822	80.9043	2.5794	4.6296	0.0109	2.411	-0.2234	0.8256	0.2507	0.1962	-0.2357	1.4409	0.2525	0.0568	3.5139	0.8935	16.5026	0.5976	9.8934
6-D	6564.8	17900.3	0.7666	0.5419	0	3.7236	0.6715	0.0145	32.3726	0.6504	46.3051	0.3429	18.7133	114.393	4.9307	8.26	0.0029	3.5191	-0.1591	0.8674	0.3532	0.3092	-0.1654	1.8231	0.2615	0.0226	28.6735	0.6618	42.3975	0.3847	14.2225	110.239	4.6453	7.834	0.0034	3.3937	-0.1683	0.8687	0.142	0.1253	-0.3892	1.0992	0.1205	0.0476	3.0828	0.7716	6.7492	0.5839	5.1557
6-C	9934.1	17506.1	0.4936	0.5241	0	3.682	0.4105	0.0616	24.7555	0.7047	41.9188	0.5436	11.7983	109.864	4.0623	6.5782	0.0064	2.8871	-0.2666	0.9296	0.1221	0.2506	-0.2437	1.791	0.0205	0.311	16.8808	0.6836	26.6789	0.6902	4.8153	75.7498	2.3018	4.2881	0.0116	2.3092	-0.2041	0.7852	0.2121	0.1697	-0.3002	1.3327	0.2145	0.0664	4.9489	0.7963	12.1475	0.5785	8.2772
6-B	13298.1	17806	0.4971	0.4489	0	3.5321	0.4405	0.0357	22.4558	0.6455	31.6694	0.4613	11.8711	79.1533	4.2221	7.0323	0.0048	3.0701	-0.1958	0.8812	0.1208	0.2197	-0.265	1.6917	0.0385	0.1988	15.8706	0.6064	20.1586	0.6312	4.6817	53.7944	2.5823	4.8654	0.009	2.519	-0.1663	0.7604	0.2167	0.1617	-0.3937	1.2905	0.2105	0.0411	5.3591	0.7611	11.2184	0.5208	8.4024
6-A	16838.2	17172.7	0.5458	0.4882	0	3.6727	0.4885	0.0509	17.2207	0.7698	37.4003	0.4762	13.1736	92.6096	4.2905	7.1474	0.005	2.9802	-0.2363	0.9202	0.1386	0.2208	-0.2585	1.6442	0.0445	0.1896	11.6376	0.7125	20.241	0.6239	5.4558	55.0117	2.8051	5.1159	0.0088	2.4745	-0.2102	0.8318	0.2304	0.2132	-0.2274	1.6175	0.1895	0.0602	4.7912	0.8785	19.7218	0.564	9.0372
7-E	2560.6	21025	0.547	0.6461	0	3.7806	0.3825	0.0886	31.7012	0.7435	61.802	0.5129	13.1038	161.522	4.1025	6.8867	0.0056	3.1067	-0.2391	0.9171	0.1635	0.2866	-0.204	1.8151	0.0385	0.2009	24.2585	0.6578	35.443	0.6248	6.4289	96.8087	2.8641	5.2309	0.0089	2.6515	-0.1926	0.8155	0.1995	0.203	-0.1965	1.3192	0.1555	0.1104	5.3474	0.848	17.5914	0.6003	7.7817
7-D	6586.5	21161.8	0.543	0.4473	0	3.5018	0.5245	0.045	14.488	0.7683	31.2601	0.5006	13.0906	75.8052	4.2135	6.8979	0.0056	2.8475	-0.2487	0.9244	0.1244	0.2033	-0.2615	1.7389	0.0405	0.2023	9.6007	0.7231	17.3328	0.6451	4.7629	48.4295	2.6266	4.843	0.0094	2.3554	-0.2138	0.8246	0.2474	0.1871	-0.2133	1.3777	0.2465	0.0505	4.0474	0.865	14.9864	0.5678	9.7473
7-C	9741.9	20510.7	0.4741	0.4508	0	3.3953	0.4015	0.0407	20.6172	0.6772	31.9356	0.4585	11.2952	80.4635	4.217	7.1396	0.0047	3.0584	-0.1925	0.8792	0.1236	0.2032	-0.2234	1.7169	0.0485	0.1658	12.691	0.6373	17.4944	0.6155	4.658	47.3969	2.6895	5.024	0.0084	2.5035	-0.1679	0.7694	0.1977	0.1822	-0.2553	1.2237	0.1595	0.0551	5.1129	0.8228	14.4272	0.5486	7.5849
7-B	13636.7	20740.3	0.6085	0.5455	0	4.0111	0.4815	0.0157	31.3455	0.6561	45.5766	0.3884	14.5764	127.407	4.736	7.8113	0.0036	3.3567	-0.1563	0.8507	0.182	0.2575	-0.1871	2.1287	0.0745	0.0867	18.9695	0.6765	29.316	0.5393	6.8571	81.5369	3.2506	5.9583	0.0063	2.8411	-0.164	0.804	0.2268	0.159	-0.189	1.3701	0.2145	0.0229	7.5726	0.6597	11.1265	0.4676	8.7518
7-A	16483.9	20159.7	0.4944	0.363	0	3.2155	0.4725	0.0258	12.5945	0.6977	20.8291	0.4978	11.7778	52.1695	4.2575	6.8567	0.0059	2.732	-0.2205	0.8988	0.0984	0.1747	-0.2245	1.4366	0.0355	0.2225	8.8337	0.6534	12.7445	0.6718	3.6047	35.3832	2.2994	4.4088	0.0103	2.2275	-0.1829	0.76	0.2419	0.1661	-0.229	1.1977	0.2345	0.0295	3.5861	0.8507	12.0091	0.552	9.436
8-E	3043.8	24055	0.5726	0.6099	0	3.9526	0.4975	0.0724	28.2182	0.7415	54.5785	0.5276	13.7401	138.921	4.159	6.8071	0.006	3.0086	-0.2611	0.9311	0.1407	0.278	-0.2345	1.9937	0.0255	0.2451	19.762	0.6953	32.4325	0.6583	5.7224	92.2094	2.6363	4.8064	0.0102	2.4766	-0.2076	0.8159	0.2466	0.2183	-0.7719	1.6035	0.2315	0.0842	5.8279	0.8571	20.3859	0.5796	9.7819
8-D	6915.8	23858	0.5737	0.3745	0	3.835	0.5365	0.0217	14.8466	0.6657	22.2067	0.4611	13.7895	53.3539	4.3859	7.1211	0.005	2.9163	-0.1908	0.8771	0.1469	0.1927	-0.1996	2.1724	0.0735	0.1017	11.8403	0.631	16.0451	0.5602	5.459	41.4565	3.0497	5.615	0.0068	2.6647	-0.1585	0.7803	0.2432	0.1467	-0.2291	1.1691	0.2575	0.0285	3.2053	0.8283	9.3336	0.5635	9.468
8-C	10088.6	23602.5	0.5703	0.5128	0	3.4718	0.4835	0.0486	17.3791	0.7897	41.3224	0.4817	13.7912	105.355	4.3686	7.1772	0.0051	2.9655	-0.2568	0.9357	0.1278	0.2193	-0.3146	1.9085	0.0435	0.1959	11.8235	0.7057	20.0867	0.6525	4.9557	56.3846	2.6199	4.8441	0.0097	2.375	-0.214	0.8252	0.2608	0.2179	-0.2748	1.335	0.2405	0.054	5.8587	0.8576	20.5729	0.5439	10.3277
8-B	13340.6	23646.6	0.5318	0.4426	0	3.3373	0.4815	0.0254	21.3324	0.6526	30.7045	0.4257	12.7275	77.5542	4.3609	7.2649	0.0043	3.1076	-0.1766	0.8648	0.0967	0.2124	-0.2686	1.5657	0.0195	0.2816	13.5476	0.6296	18.2875	0.6934	3.9322	50.7247	2.2585	4.2358	0.0114	2.2371	-0.1976	0.7741	0.2689	0.1928	-0.4533	1.2341	0.2545	0.0285	7.926	0.756	16.244	0.4658	10.6016
8-A	17148.1	22963.3	0.5351	0.4416	0	3.3483	0.5045	0.0474	13.4131	0.7797	30.4448	0.5155	12.896	74.3163	4.1616	6.7777	0.0059	2.7844	-0.2611	0.9305	0.1312	0.2298	-0.2204	1.5466	0.0255	0.2493	10.3087	0.7632	21.7663	0.661	5.2879	61.7204	2.6338	4.741	0.0103	2.3236	-0.2448	0.8536	0.2332	0.1829	-0.2143	1.2373	0.2375	0.0591	3.0212	0.8942	14.2777	0.6081	9.1435
9-D	6798.6	26600.6	0.4538	0.4159	0	3.4718	0.4155	0.0562	16.6362	0.6929	27.0846	0.5082	10.8363	64.3038	4.0006	6.7028	0.0056	2.8864	-0.2291	0.9052	0.129	0.2004	-0.2126	1.8859	0.0485	0.1724	12.1725	0.6461	17.1961	0.6176	4.8257	45.8091	2.7117	5.0476	0.0085	2.509	-0.1784	0.788	0.1773	0.1498	-0.2224	1.1616	0.1675	0.0722	3.0421	0.8388	9.4337	0.6137	6.7743
9-C	9950.1	26320.2	0.5552	0.4473	0	3.5203	0.5225	0.0382	16.8009	0.7317	31.3141	0.4635	13.377	74.1868	4.3087	7.1684	0.0048	2.9979	-0.2186	0.9068	0.1972	0.22	-0.2255	1.8705	0.1215	0.0674	12.4199	0.7058	21.1103	0.5245	7.5955	55.4342	3.604	6.2889	0.006	2.7638	-0.2007	0.8641	0.1712	0.1519	-0.1893	1.2437	0.1455	0.0668	2.7174	0.8627	9.8939	0.6364	6.4612
9-B	13418.7	26288.1	0.5405	0.4056	0	3.2558	0.5155	0.0329	13.385	0.7413	25.8673	0.4649	13.003	60.9678	4.3087	7.1139	0.0049	2.9036	-0.2214	0.9073	0.1692	0.205	-0.2765	1.4378	0.0935	0.1047	10.0613	0.7181	17.8455	0.5566	6.519	45.9987	3.266	5.8138	0.0068	2.6289	-0.2068	0.8542	0.1928	0.1761	-0.1647	1.2458	0.1505	0.0547	2.3722	0.9121	13.4929	0.6307	7.3605
9-A	17000.3	25799.1	0.5301	0.4306	0	3.398	0.4765	0.0284	18.5642	0.6828	29.262	0.4441	12.7127	72.9932	4.3792	7.2662	0.0046	3.0493	-0.1975	0.8877	0.146	0.2206	-0.3111	1.8342	0.0585	0.1413	14.2047	0.6605	20.9188	0.5898	5.5398	56.3069	2.9121	5.3828	0.0076	2.6329	-0.1724	0.7916	0.2104	0.1595	-0.2951	1.1721	0.1955	0.0393	3.8245	0.8257	10.9727	0.5635	8.1178
[truncated: 124 more columns]

## Sheet: RPX2
Name	Centroid X µm	Centroid Y µm	OD Sum: Mean	OD Sum: Std.dev.	OD Sum: Min	OD Sum: Max	OD Sum: Median	OD Sum: Haralick Angular second moment (F0)	OD Sum: Haralick Contrast (F1)	OD Sum: Haralick Correlation (F2)	OD Sum: Haralick Sum of squares (F3)	OD Sum: Haralick Inverse difference moment (F4)	OD Sum: Haralick Sum average (F5)	OD Sum: Haralick Sum variance (F6)	OD Sum: Haralick Sum entropy (F7)	OD Sum: Haralick Entropy (F8)	OD Sum: Haralick Difference variance (F9)	OD Sum: Haralick Difference entropy (F10)	OD Sum: Haralick Information measure of correlation 1 (F11)	OD Sum: Haralick Information measure of correlation 2 (F12)	Hematoxylin: Mean	Hematoxylin: Std.dev.	Hematoxylin: Min	Hematoxylin: Max	Hematoxylin: Median	Hematoxylin: Haralick Angular second moment (F0)	Hematoxylin: Haralick Contrast (F1)	Hematoxylin: Haralick Correlation (F2)	Hematoxylin: Haralick Sum of squares (F3)	Hematoxylin: Haralick Inverse difference moment (F4)	Hematoxylin: Haralick Sum average (F5)	Hematoxylin: Haralick Sum variance (F6)	Hematoxylin: Haralick Sum entropy (F7)	Hematoxylin: Haralick Entropy (F8)	Hematoxylin: Haralick Difference variance (F9)	Hematoxylin: Haralick Difference entropy (F10)	Hematoxylin: Haralick Information measure of correlation 1 (F11)	Hematoxylin: Haralick Information measure of correlation 2 (F12)	Eosin: Mean	Eosin: Std.dev.	Eosin: Min	Eosin: Max	Eosin: Median	Eosin: Haralick Angular second moment (F0)	Eosin: Haralick Contrast (F1)	Eosin: Haralick Correlation (F2)	Eosin: Haralick Sum of squares (F3)	Eosin: Haralick Inverse difference moment (F4)	Eosin: Haralick Sum average (F5)
1-E	5463.8	2748.4	0.4816	0.4272	0	3.1312	0.4155	0.0422	15.0953	0.7383	28.8388	0.4792	11.5059	73.2502	4.2085	6.9808	0.0052	2.9072	-0.2288	0.911	0.1889	0.2268	-0.1356	1.8587	0.1215	0.0605	14.0994	0.6899	22.7347	0.5556	7.227	64.5863	3.6093	6.0597	0.0068	2.6807	-0.2199	0.8777	0.1337	0.1293	-0.4645	0.9678	0.1045	0.0758	2.7831	0.8037	7.0876	0.6316	4.8645
1-B	14824.7	3435.3	0.3197	0.4347	0	3.6065	0.0545	0.2332	11.1456	0.8092	29.206	0.6527	7.5975	76.9843	3.0411	5.1543	0.0101	2.3546	-0.3077	0.9186	0.1077	0.1906	-0.0837	1.9322	0.0175	0.266	8.6096	0.7232	15.5495	0.711	4.0207	44.9053	2.4275	4.2956	0.0121	2.0689	-0.2794	0.8652	0.1105	0.159	-1.0621	0.9364	0.0125	0.2768	2.3406	0.8887	10.5138	0.7401	4.1413
1-A	17812.2	3143.7	0.4419	0.4021	0	3.3789	0.4455	0.0772	14.8625	0.7035	25.0644	0.5274	10.555	54.5296	3.7666	6.386	0.0061	2.7957	-0.2443	0.9097	0.1609	0.2048	-0.0777	2.5139	0.1115	0.0921	13.9921	0.6171	18.271	0.5837	6.1061	48.0199	3.301	5.6445	0.0075	2.6084	-0.226	0.871	0.1377	0.1264	-0.7383	0.9006	0.1245	0.1091	2.3296	0.8205	6.4892	0.6569	5.1341
2-E	4692.8	6323.1	0.4193	0.4024	0	3.2007	0.3785	0.0601	15.2359	0.7	25.3967	0.5289	9.9391	62.4701	3.8835	6.4663	0.0061	2.7843	-0.2374	0.9059	0.1678	0.222	-0.1505	2.0589	0.1005	0.0798	14.8635	0.6573	21.685	0.5861	6.3516	60.3683	3.3653	5.7776	0.0075	2.6157	-0.2179	0.8668	0.1124	0.1082	-0.4362	0.8014	0.0935	0.1097	1.6258	0.8299	4.7795	0.695	3.9978
2-D	8158	6601	0.4586	0.4511	0	3.7748	0.4125	0.0976	13.2525	0.791	31.7019	0.5381	11.0293	75.0076	3.8147	6.3995	0.0064	2.7642	-0.2753	0.9315	0.2072	0.2377	-0.0931	2.8724	0.1505	0.1041	12.5976	0.7426	24.4678	0.5694	8.1361	63.7917	3.5683	5.9916	0.0071	2.6615	-0.2723	0.9197	0.0947	0.102	-0.8647	1.0697	0.0735	0.152	1.3563	0.8373	4.1693	0.7338	3.3144
2-B	14606.4	6368.8	0.5494	0.4401	0	3.4845	0.4965	0.0211	19.3511	0.6844	30.661	0.4118	13.1674	79.2766	4.5047	7.5113	0.0041	3.1187	-0.1752	0.8628	0.2106	0.2517	-0.1462	2.5377	0.1205	0.0418	16.9226	0.7002	28.2196	0.4995	8.0741	82.8862	3.8042	6.5049	0.0057	2.8674	-0.1739	0.8318	0.1586	0.1323	-0.7593	0.861	0.1365	0.0486	3.2971	0.7798	7.4865	0.5802	5.8822
2-A	17393.2	5908.7	0.5397	0.4824	0	3.4483	0.5025	0.0623	17.8405	0.7554	36.465	0.4761	13.0479	85.0626	4.1516	6.9893	0.005	3.0119	-0.2384	0.9196	0.2132	0.2558	-0.0924	2.4758	0.1235	0.0748	16.8684	0.7063	28.7155	0.5283	8.3227	78.5013	3.7266	6.3513	0.006	2.8611	-0.2231	0.8903	0.1484	0.1312	-0.6254	0.8506	0.1355	0.0877	2.4936	0.8243	7.0979	0.6349	5.5614
3-E	4405.8	9644	0.4599	0.429	0	3.2492	0.3995	0.0508	15.033	0.7409	29.0112	0.4958	10.9557	73.4886	4.1081	6.8596	0.0054	2.8816	-0.2303	0.9097	0.1797	0.223	-0.1143	2.4976	0.1065	0.073	14.0984	0.6776	21.8636	0.5482	6.8431	59.9006	3.4734	6.0557	0.0065	2.7278	-0.1959	0.8515	0.1293	0.1319	-0.8022	0.9117	0.0965	0.0974	1.9445	0.8671	7.3183	0.6741	4.7051
3-D	7833.6	9566.5	0.5343	0.5016	0	4.0044	0.5175	0.0821	18.7626	0.7568	38.5804	0.5016	12.9186	87.2075	3.9916	6.764	0.0055	2.9712	-0.2449	0.9193	0.2087	0.2715	-0.1525	3.1495	0.1165	0.1001	17.6716	0.7121	30.694	0.5498	8.1288	82.9282	3.5946	6.1919	0.0066	2.8138	-0.2316	0.8934	0.149	0.1607	-1.4913	0.9315	0.1105	0.1164	3.0532	0.8513	10.2629	0.6507	5.7004
3-C	11039	9756.8	0.7631	0.4793	0	3.7157	0.7455	0.013	22.5618	0.6898	36.3636	0.3445	18.6051	86.9117	4.8217	8.053	0.0032	3.3214	-0.1548	0.8547	0.3152	0.2497	-0.1571	2.0102	0.2635	0.017	18.6301	0.6642	27.7368	0.3923	12.5401	73.2231	4.537	7.5649	0.0039	3.1533	-0.1611	0.8502	0.1948	0.1338	-0.5991	1.0605	0.1805	0.0312	3.5934	0.7709	7.8444	0.5455	7.3893
3-B	14342.1	9039	0.4439	0.4564	0	3.6536	0.4295	0.1226	12.8681	0.8007	32.2815	0.5918	10.676	76.5196	3.5898	5.9318	0.0077	2.5784	-0.3136	0.9423	0.1509	0.2271	-0.0934	2.5638	0.0795	0.1421	11.7662	0.7384	22.4898	0.6499	5.7471	65.5659	3.0556	5.1885	0.0095	2.3646	-0.2907	0.9089	0.1516	0.141	-0.5801	0.8881	0.1515	0.1415	1.9596	0.8786	8.0739	0.6946	5.7912
3-A	17449	8925	0.5486	0.4868	0	3.5872	0.5315	0.0658	15.7269	0.7849	36.5575	0.5235	13.2662	86.1879	4.0825	6.7166	0.006	2.8294	-0.2717	0.9356	0.173	0.2432	-0.1249	2.5361	0.0815	0.1081	13.4773	0.7405	25.9694	0.5978	6.579	74.7338	3.2439	5.6852	0.0078	2.5725	-0.2386	0.8831	0.2047	0.1722	-0.7214	1.2002	0.1965	0.0766	3.1872	0.8725	12.4991	0.6162	7.9726
4-E	4119.6	13056	0.4738	0.4284	0	3.4107	0.4145	0.0427	18.3122	0.6836	28.9421	0.4658	11.3028	71.4839	4.1433	6.9719	0.0048	3.0207	-0.2017	0.8862	0.2035	0.2423	-0.1127	2.4792	0.1255	0.0562	17.7924	0.6568	25.9235	0.5158	7.8458	71.056	3.7296	6.3915	0.0058	2.8899	-0.1895	0.8551	0.111	0.1041	-0.6816	0.7908	0.0935	0.0918	1.7795	0.8006	4.4619	0.6711	3.8986
4-D	7700.8	12501.6	0.4339	0.4996	0	3.9349	0.3115	0.1376	15.994	0.7946	38.9416	0.5581	10.4615	98.2431	3.6657	6.1989	0.0069	2.7739	-0.2811	0.9305	0.1925	0.2583	-0.1541	2.9963	0.1065	0.1474	14.6259	0.7471	28.9122	0.5934	7.5712	78.3743	3.3552	5.7181	0.0079	2.6377	-0.2727	0.9125	0.0941	0.1176	-0.9182	0.8567	0.0585	0.188	1.8302	0.8368	5.6074	0.7245	3.3533
4-C	10561.6	12751.7	0.4526	0.4808	0	3.5249	0.4015	0.1325	13.0388	0.818	35.8245	0.5715	10.9108	85.9506	3.6343	6.0993	0.0073	2.6623	-0.295	0.9362	0.1622	0.2256	-0.1446	2.4988	0.0915	0.1472	11.4125	0.7405	21.9875	0.6263	6.2546	61.075	3.1742	5.4061	0.0088	2.4452	-0.2792	0.9077	0.1446	0.1537	-0.7752	1.2488	0.1105	0.1591	2.6467	0.8644	9.7575	0.6795	5.5071
4-B	14558.6	11880.5	0.7861	0.5897	0	3.7509	0.6625	0.0115	38.5308	0.6351	52.7975	0.3485	19.0569	141.207	5.0035	8.2066	0.003	3.553	-0.1482	0.8499	0.3087	0.3182	-0.1241	2.2519	0.1975	0.0205	32.0408	0.6458	45.2272	0.4141	12.236	128.685	4.5352	7.5518	0.0039	3.3341	-0.158	0.8469	0.2194	0.153	-0.338	1.2239	0.2015	0.0237	5.7372	0.721	10.2813	0.4977	8.4409
4-A	17265.5	11884.5	0.5864	0.5186	0	3.3055	0.5025	0.0417	19.9328	0.7657	42.5295	0.4349	14.1852	107.266	4.4535	7.4714	0.0042	3.1399	-0.2201	0.9152	0.2158	0.2645	-0.1432	1.8913	0.1225	0.0633	17.4941	0.717	30.9088	0.5079	8.3853	87.0939	3.7294	6.4406	0.0056	2.9067	-0.1974	0.866	0.1802	0.1709	-0.3677	0.9672	0.1375	0.0616	4.3386	0.8282	12.6306	0.5791	6.8519
5-E	3498.5	16015	0.456	0.3792	0	3.5363	0.4175	0.0398	13.7701	0.695	22.5714	0.5193	10.8262	56.0665	4.0355	6.5674	0.0061	2.7349	-0.2331	0.9048	0.1434	0.2132	-0.1166	1.9895	0.0675	0.1202	13.0067	0.6736	19.9268	0.6138	5.2801	55.824	2.9246	5.3166	0.0083	2.4927	-0.206	0.836	0.171	0.1352	-0.2869	0.8772	0.1585	0.0536	2.0685	0.8667	7.7579	0.6321	6.445
5-D	6878.4	15584.5	0.4764	0.4432	0	3.5208	0.4095	0.0557	15.3909	0.7507	30.8622	0.4859	11.3992	76.2958	4.1157	6.9372	0.0052	2.9185	-0.2243	0.9052	0.1878	0.236	-0.0903	2.2102	0.1045	0.0812	13.2983	0.7284	24.4808	0.5533	7.1953	68.3402	3.4802	6.0726	0.0067	2.6943	-0.2137	0.8707	0.1316	0.1592	-0.5976	1.0461	0.0745	0.1161	2.927	0.8652	10.8558	0.657	4.8048
5-C	10146.2	15624.1	0.5943	0.4394	0	3.5521	0.5645	0.0251	17.0316	0.7203	30.4509	0.4252	14.3262	73.5382	4.4684	7.445	0.0043	3.0661	-0.192	0.8877	0.2351	0.2324	-0.1496	2.1595	0.1775	0.0368	14.6473	0.6933	23.8753	0.4906	9.1528	64.6294	4.0255	6.7661	0.0054	2.8617	-0.1963	0.8741	0.1634	0.1411	-0.5485	1.0192	0.1375	0.0499	3.0764	0.8215	8.618	0.6014	6.0868
5-B	13589.6	14776.7	0.5293	0.3442	0	3.467	0.5535	0.05	8.4001	0.7697	18.2347	0.6321	12.6799	40.3097	3.7735	5.6974	0.0092	2.2037	-0.3146	0.9367	0.065	0.1616	-0.1359	2.2929	0.0225	0.3361	6.6573	0.6914	10.7859	0.7808	2.3388	33.177	1.6715	3.3146	0.0149	1.6912	-0.2358	0.7635	0.3217	0.1854	-0.3791	1.0861	0.3475	0.0367	2.5329	0.9143	14.7791	0.6047	12.8678
5-A	16779.2	14425	0.5186	0.4398	0	3.6045	0.5105	0.0587	13.8327	0.7709	30.1886	0.509	12.498	69.1566	4.0801	6.795	0.0057	2.838	-0.2485	0.9219	0.1778	0.2287	-0.1624	2.6489	0.0825	0.1314	11.5037	0.7458	22.6247	0.5807	6.8582	60.0626	3.2278	5.7209	0.0074	2.6035	-0.2341	0.8799	0.1766	0.1669	-0.7484	1.1892	0.1345	0.078	2.6298	0.8896	11.9063	0.6408	6.7376
6-E	3585.7	19196.7	0.5508	0.4462	0	3.3469	0.4685	0.0254	21.3319	0.662	31.557	0.4278	13.2245	79.5141	4.448	7.3993	0.0042	3.1489	-0.185	0.8788	0.2422	0.2592	-0.1098	1.8215	0.1525	0.0375	20.5159	0.6566	29.8692	0.4727	9.4548	81.5194	4.0802	6.9092	0.0049	3.0481	-0.1835	0.8631	0.1225	0.1069	-0.3035	0.9155	0.1055	0.0674	2.2108	0.7681	4.767	0.632	4.3495
6-D	6767.1	18768.9	0.4044	0.4349	0	3.2959	0.3185	0.0804	16.3397	0.7246	29.6648	0.5185	9.5969	75.5824	3.8276	6.4865	0.0059	2.8607	-0.2408	0.9093	0.1808	0.2404	-0.0852	2.3846	0.1075	0.0969	15.64	0.6908	25.2926	0.5694	6.9572	69.7384	3.4144	5.8866	0.0071	2.6936	-0.2288	0.8814	0.0851	0.1046	-0.6561	0.9118	0.0595	0.1598	1.7898	0.7983	4.4372	0.7202	2.8735
6-C	10698.6	18725.7	0.4411	0.512	0	3.524	0.3105	0.1318	15.7656	0.8068	40.8046	0.5531	10.6024	104.757	3.684	6.2406	0.0068	2.7752	-0.2726	0.9258	0.1648	0.2391	-0.1481	1.8738	0.0835	0.1523	13.4612	0.7285	24.7932	0.6062	6.3654	69.0293	3.1408	5.4657	0.0082	2.5547	-0.2449	0.8821	0.1325	0.1527	-0.3063	0.9696	0.0765	0.1835	2.7444	0.8584	9.6882	0.69	4.9795
6-B	13748.9	17680.7	0.7123	0.5311	0	3.5176	0.7015	0.0327	19.7246	0.7782	44.4584	0.4352	17.376	103.73	4.602	7.6156	0.0043	3.1274	-0.223	0.9193	0.232	0.2845	-0.1551	2.6597	0.1075	0.0817	16.0575	0.7745	35.5974	0.5171	9.0861	98.843	3.6685	6.4456	0.0058	2.8786	-0.2124	0.8802	0.2571	0.2024	-0.7964	1.2583	0.2365	0.0437	4.5193	0.8734	17.856	0.5476	10.1167
6-A	16458.4	17232.6	0.4739	0.4848	0	3.6235	0.4005	0.0836	15.9662	0.7828	36.7548	0.5288	11.4003	93.0148	3.9624	6.6056	0.0061	2.843	-0.2681	0.9315	0.1936	0.2533	-0.1519	2.7682	0.1055	0.1002	14.4213	0.7429	28.0473	0.5792	7.5198	79.0477	3.4964	5.9618	0.0073	2.6675	-0.2506	0.9028	0.123	0.1229	-0.8622	0.9061	0.1025	0.1153	2.0236	0.8352	6.1399	0.6829	4.522
7-E	2930.1	22238.7	0.4437	0.4323	0	3.4604	0.3675	0.0533	16.6104	0.7172	29.3692	0.5169	10.5554	75.7614	4.0499	6.6972	0.0058	2.853	-0.2415	0.9149	0.1753	0.2446	-0.1391	1.8917	0.0855	0.0937	16.7837	0.6811	26.3121	0.5739	6.6734	73.5226	3.3102	5.8375	0.0072	2.7069	-0.2067	0.8566	0.1225	0.129	-0.3454	1.0389	0.0905	0.1001	1.9733	0.8587	6.9816	0.673	4.4155
7-D	6987.2	21512.4	0.4828	0.4236	0	3.3991	0.4235	0.0398	19.2891	0.6582	28.2136	0.4478	11.53	67.2611	4.1922	7.1099	0.0045	3.0836	-0.1899	0.877	0.2469	0.2553	-0.1288	2.5197	0.1765	0.0446	20.1581	0.6489	28.7087	0.4701	9.7138	74.938	4.0609	6.8791	0.0048	3.0519	-0.1897	0.8703	0.0644	0.0889	-0.7142	0.8279	0.0385	0.2331	1.1161	0.8173	3.0537	0.7755	2.0005
7-C	10700.5	21702.8	0.8065	0.4686	0	4.0562	0.7075	0.0072	23.7512	0.6454	33.4971	0.3405	19.5636	100.627	5.0696	8.1015	0.0035	3.2817	-0.1269	0.8068	0.2619	0.2519	-0.1593	2.1868	0.1725	0.0177	20.0269	0.6466	28.3356	0.4076	10.1881	82.0967	4.3484	7.2694	0.0043	3.1206	-0.1317	0.7917	0.2926	0.1566	-0.6053	1.4926	0.2705	0.0168	4.0951	0.8154	11.0936	0.4999	11.4951
7-B	13548.1	20581.4	0.2524	0.4356	0	3.6065	0.0015	0.305	9.6397	0.8321	28.713	0.6853	5.9457	84.8843	2.6339	4.5111	0.0115	2.1911	-0.2935	0.8859	0.0961	0.1971	-0.1222	2.357	0	0.3423	8.2829	0.7473	16.3869	0.7218	3.6328	49.2444	2.1709	3.8909	0.0128	2.0077	-0.2474	0.814	0.0733	0.1348	-1.3267	0.9074	0	0.436	1.3656	0.9086	7.4716	0.827	2.6511
7-A	16378.5	20360.4	0.6236	0.5068	0	3.6393	0.5995	0.0432	17.7377	0.7797	40.2626	0.454	15.1519	95.433	4.4425	7.3761	0.0046	3.0576	-0.2348	0.9248	0.2227	0.2601	-0.1477	2.5567	0.1255	0.0831	15.5108	0.7376	29.5524	0.5201	8.7263	77.9408	3.6664	6.4214	0.0059	2.8631	-0.2117	0.8805	0.2018	0.1949	-0.687	1.2687	0.1465	0.0612	3.9437	0.8804	16.4812	0.5878	7.7901
8-E	2679.8	25077.2	0.4537	0.4718	0	3.3906	0.3625	0.0786	17.4108	0.7503	34.8605	0.5118	10.877	88.3775	3.9631	6.6588	0.0057	2.9149	-0.2497	0.9203	0.2154	0.277	-0.1278	1.8651	0.1175	0.0916	19.1474	0.7159	33.7007	0.543	8.439	92.7504	3.6438	6.2672	0.0064	2.8597	-0.2282	0.8925	0.0824	0.1015	-0.42	0.9255	0.0545	0.1782	1.4272	0.8233	4.0377	0.7372	2.8247
8-D	6753.4	24475.9	0.4403	0.3806	0	3.4706	0.3715	0.0398	11.2907	0.753	22.8567	0.5174	10.433	60.3066	4.0912	6.6633	0.006	2.7122	-0.2427	0.915	0.2004	0.2244	-0.1635	2.2108	0.1295	0.0518	12.6619	0.7155	22.249	0.5471	7.7062	64.3681	3.7581	6.2146	0.0066	2.6841	-0.2245	0.8875	0.0901	0.0942	-0.4071	1.0309	0.0705	0.1287	1.0845	0.8474	3.5542	0.7419	3.0239
8-C	10318	23836.2	0.6875	0.7102	0	3.7696	0.5715	0.122	23.0025	0.8508	77.1005	0.5114	16.841	184.089	4.0925	6.8426	0.0058	3.0399	-0.2853	0.9461	0.2953	0.3589	-0.1849	2.2686	0.1505	0.1321	21.873	0.8051	56.1086	0.5311	11.9444	148.899	3.845	6.5154	0.0063	2.968	-0.2713	0.9316	0.1626	0.1694	-0.5278	1.2526	0.1285	0.1429	2.67	0.8882	11.9384	0.6742	6.2757
8-B	13746.8	23390.7	0.4919	0.4389	0	3.6421	0.4325	0.0442	15.6378	0.7412	30.215	0.4897	11.7689	76.2108	4.2145	7.0019	0.0053	2.9072	-0.2291	0.9114	0.1977	0.2425	-0.165	1.8959	0.1045	0.0696	14.1956	0.7267	25.9706	0.5467	7.586	73.2187	3.5921	6.2151	0.0065	2.7362	-0.2141	0.8762	0.1329	0.13	-0.2752	1.1172	0.1025	0.0884	2.3412	0.8355	7.1146	0.6581	4.8446
8-A	16170.3	23483.1	0.506	0.6141	0	3.7891	0.3185	0.1663	18.1538	0.8446	58.4099	0.5704	12.3172	151.746	3.674	6.1438	0.0074	2.7745	-0.3041	0.942	0.2191	0.3127	-0.1604	2.76	0.0965	0.1769	17.6558	0.7925	42.5515	0.5972	8.7418	119.214	3.3683	5.7219	0.0081	2.6769	-0.2842	0.9203	0.1168	0.1485	-0.9201	1.0987	0.0615	0.2113	2.075	0.8855	9.0635	0.7285	4.3929
9-E	2280.9	27940.2	0.3609	0.4197	0	3.3338	0.2765	0.1075	14.8252	0.7302	27.4726	0.5651	8.5358	70.597	3.5904	6.0641	0.007	2.7029	-0.2623	0.9143	0.1793	0.2572	-0.1267	1.9026	0.0915	0.1214	17.4111	0.6991	28.9301	0.5923	6.9329	80.6115	3.313	5.734	0.0077	2.6619	-0.2394	0.8861	0.0543	0.0913	-0.4848	0.9248	0.0195	0.3146	1.1289	0.8124	3.0096	0.8019	1.828
9-D	6626	27021.2	0.4808	0.3331	0	3.6937	0.4395	0.0236	10.7358	0.6942	17.5566	0.5005	11.4052	45.5173	4.2413	6.7611	0.006	2.6783	-0.2119	0.8897	0.1854	0.2132	-0.1275	2.2444	0.1145	0.0569	11.303	0.7182	20.0554	0.5575	7.0163	56.6439	3.5715	6.1016	0.0069	2.6055	-0.2167	0.8755	0.1399	0.1426	-0.3133	1.0257	0.1045	0.089	1.8617	0.89	8.4601	0.6839	5.1832
9-C	10067.5	26957.8	0.633	0.52	0	3.5919	0.5855	0.036	23.3376	0.7247	42.3794	0.4074	15.3525	100.006	4.5133	7.6604	0.0037	3.2664	-0.1922	0.8929	0.3135	0.2976	-0.1502	2.4977	0.2295	0.0401	23.1418	0.7034	39.0162	0.426	12.5427	99.9118	4.3646	7.4387	0.004	3.2305	-0.188	0.8826	0.1001	0.1147	-1.0734	1.11	0.0695	0.1329	2.3204	0.7816	5.3113	0.6698	3.5245
9-B	13275.4	26998.1	0.5359	0.5465	0	3.8028	0.4215	0.0797	17.2884	0.815	46.73	0.5111	12.9694	121.008	4.1465	6.8697	0.0057	2.917	-0.2785	0.9426	0.2459	0.299	-0.1694	2.4272	0.1495	0.0899	17.5414	0.7763	39.2058	0.5421	9.7529	109.645	3.8281	6.4232	0.0064	2.8366	-0.2645	0.9247	0.1066	0.1434	-0.634	1.0798	0.0585	0.1701	1.7833	0.8961	8.5825	0.7245	3.839
9-A	16211.5	26304	0.6665	0.4822	0	3.6837	0.6085	0.0169	24.6343	0.6606	36.2955	0.3854	16.1364	90.3048	4.7115	7.8411	0.0036	3.2954	-0.1659	0.8656	0.2897	0.2983	-0.1718	2.4221	0.1915	0.0305	25.1012	0.6809	39.3357	0.4288	11.4729	107.438	4.3404	7.386	0.0041	3.2306	-0.173	0.8627	0.1531	0.1591	-0.4986	0.9747	0.1055	0.0719	3.3174	0.8452	10.7118	0.6053	5.7092
[truncated: 124 more columns]

## Sheet: RPX3
Name	Centroid X µm	Centroid Y µm	OD Sum: Mean	OD Sum: Std.dev.	OD Sum: Min	OD Sum: Max	OD Sum: Median	OD Sum: Haralick Angular second moment (F0)	OD Sum: Haralick Contrast (F1)	OD Sum: Haralick Correlation (F2)	OD Sum: Haralick Sum of squares (F3)	OD Sum: Haralick Inverse difference moment (F4)	OD Sum: Haralick Sum average (F5)	OD Sum: Haralick Sum variance (F6)	OD Sum: Haralick Sum entropy (F7)	OD Sum: Haralick Entropy (F8)	OD Sum: Haralick Difference variance (F9)	OD Sum: Haralick Difference entropy (F10)	OD Sum: Haralick Information measure of correlation 1 (F11)	OD Sum: Haralick Information measure of correlation 2 (F12)	Hematoxylin: Mean	Hematoxylin: Std.dev.	Hematoxylin: Min	Hematoxylin: Max	Hematoxylin: Median	Hematoxylin: Haralick Angular second moment (F0)	Hematoxylin: Haralick Contrast (F1)	Hematoxylin: Haralick Correlation (F2)	Hematoxylin: Haralick Sum of squares (F3)	Hematoxylin: Haralick Inverse difference moment (F4)	Hematoxylin: Haralick Sum average (F5)	Hematoxylin: Haralick Sum variance (F6)	Hematoxylin: Haralick Sum entropy (F7)	Hematoxylin: Haralick Entropy (F8)	Hematoxylin: Haralick Difference variance (F9)	Hematoxylin: Haralick Difference entropy (F10)	Hematoxylin: Haralick Information measure of correlation 1 (F11)	Hematoxylin: Haralick Information measure of correlation 2 (F12)	Eosin: Mean	Eosin: Std.dev.	Eosin: Min	Eosin: Max	Eosin: Median	Eosin: Haralick Angular second moment (F0)	Eosin: Haralick Contrast (F1)	Eosin: Haralick Correlation (F2)	Eosin: Haralick Sum of squares (F3)	Eosin: Haralick Inverse difference moment (F4)	Eosin: Haralick Sum average (F5)
1-C	6488.6	3655.1	0.5416	0.4921	0	3.773	0.4835	0.0513	19.2704	0.7445	37.7073	0.4824	13.0577	93.6216	4.2164	7.0032	0.0051	3.0119	-0.2369	0.9186	0.2381	0.2696	-0.1497	2.1942	0.1505	0.0591	17.6267	0.7251	32.0547	0.5294	9.3663	89.9354	3.9629	6.5482	0.0061	2.8601	-0.2441	0.9133	0.1178	0.1101	-0.4595	1.182	0.1005	0.0921	2.1942	0.7781	4.945	0.6571	4.2297
1-B	10490.9	3550.2	0.3941	0.4851	0	3.6153	0.2045	0.1802	13.4503	0.8156	36.4639	0.5982	9.4898	92.957	3.3892	5.7363	0.0082	2.595	-0.2902	0.9246	0.1577	0.227	-0.1296	2.4162	0.0685	0.1917	11.1206	0.7486	22.1208	0.6361	6.1369	60.3002	3.0166	5.1975	0.0093	2.418	-0.2744	0.8975	0.1044	0.1424	-0.5287	1.0364	0.0315	0.2466	2.2007	0.868	8.3343	0.7363	3.8583
1-A	14274	2868.5	0.4838	0.5212	0	3.4327	0.4115	0.1009	19.7329	0.7665	42.2578	0.5326	11.6722	104.75	3.8975	6.5458	0.0062	2.8962	-0.2624	0.9263	0.2033	0.2619	-0.1492	1.8778	0.1355	0.1118	16.9681	0.7164	29.9198	0.5775	7.9781	80.9914	3.5138	5.9406	0.0073	2.7092	-0.259	0.9085	0.1158	0.1229	-0.4636	0.9977	0.0885	0.1405	2.1229	0.8278	6.1638	0.695	4.2297
2-C	6636.4	7478.2	0.4819	0.4396	0	3.6031	0.4425	0.0621	14.637	0.758	30.2405	0.5184	11.5632	73.4798	4.0392	6.678	0.0059	2.818	-0.258	0.9263	0.1791	0.228	-0.1522	2.2122	0.0965	0.0914	12.6672	0.7217	22.7586	0.5794	6.8522	63.1277	3.3953	5.8729	0.0073	2.6138	-0.2369	0.888	0.1452	0.1297	-0.5125	1.1641	0.1295	0.0842	2.287	0.8365	6.9928	0.6522	5.4109
2-B	10636.5	6883.6	0.4655	0.4663	0	4.2521	0.4255	0.0894	14.7382	0.7819	33.7806	0.5421	11.188	82.1141	3.8851	6.4809	0.0064	2.7746	-0.2694	0.9294	0.1555	0.2162	-0.1535	2.7974	0.0775	0.1317	11.7253	0.7099	20.2064	0.6067	5.9227	55.3071	3.1029	5.4834	0.0081	2.522	-0.2314	0.87	0.1608	0.1619	-0.5504	1.3173	0.1295	0.1171	2.6148	0.8814	11.0274	0.664	6.1247
2-A	14475.2	5960.4	0.4963	0.4999	0	3.5531	0.4315	0.0721	22.6506	0.7079	38.7757	0.4958	11.9441	93.9731	4.0343	6.8015	0.0053	3.041	-0.2359	0.9135	0.1969	0.2614	-0.1427	1.8752	0.1105	0.0878	19.4494	0.6757	29.9852	0.5569	7.6516	82.8176	3.5687	6.0883	0.0067	2.813	-0.2258	0.8853	0.1329	0.1278	-0.4763	1.0458	0.1175	0.1004	2.9971	0.776	6.6911	0.6301	4.9316
3-C	7015.9	10802.4	0.3179	0.4468	0	3.2643	0.0055	0.2743	11.0174	0.8201	30.6148	0.6762	7.6436	80.4224	2.8896	4.8412	0.0111	2.2652	-0.344	0.9299	0.1356	0.2237	-0.1316	1.9897	0	0.2863	9.6769	0.7735	21.3569	0.7062	5.2958	60.4115	2.6513	4.4888	0.0121	2.1229	-0.3355	0.9134	0.0743	0.109	-0.4744	0.9564	0.0025	0.3246	1.3285	0.857	4.646	0.7959	2.6772
3-B	10803.6	10282.1	0.4248	0.5184	0	3.3612	0.2405	0.1982	13.2707	0.8403	41.5568	0.6152	10.2939	104.983	3.3766	5.6435	0.0088	2.5367	-0.3294	0.9436	0.1589	0.2321	-0.1279	2.1795	0.0575	0.2141	10.1536	0.7804	23.1228	0.6603	6.2051	63.982	2.9697	5.0355	0.0101	2.3161	-0.3181	0.9214	0.1267	0.1521	-0.4967	1.2019	0.0665	0.2189	2.3279	0.8768	9.4479	0.7195	4.8327
3-A	14573	9369.2	0.5236	0.4805	0	3.678	0.4655	0.0519	21.4782	0.7019	36.0254	0.4731	12.6036	87.1038	4.1966	7.0182	0.0049	3.066	-0.2283	0.9126	0.1843	0.2481	-0.1544	2.0113	0.0955	0.0794	18.0674	0.6673	27.1557	0.5561	7.0403	75.4608	3.4387	6.0143	0.0067	2.7792	-0.1973	0.8526	0.1684	0.1441	-0.5013	1.2996	0.1545	0.0676	3.4143	0.8038	8.7011	0.5962	6.401
4-C	7255.1	13908.4	0.3236	0.4491	0	3.5567	0.0195	0.2556	10.0859	0.8375	31.0355	0.6657	7.7693	82.8747	2.983	5.0035	0.0106	2.2869	-0.3323	0.9284	0.1249	0.2068	-0.1436	2.4192	0.0035	0.2751	8.6758	0.7612	18.1686	0.701	4.8219	51.4178	2.5893	4.4705	0.0118	2.1226	-0.3031	0.8915	0.0914	0.1453	-0.5782	1.0379	0.0035	0.3305	1.9117	0.8897	8.6663	0.7815	3.4027
4-B	10925	13064.6	0.4265	0.4432	0	3.4192	0.3885	0.107	11.5446	0.8105	30.4631	0.5661	10.2206	75.1491	3.7072	6.1779	0.007	2.6349	-0.28	0.929	0.1347	0.1931	-0.1733	2.3492	0.0665	0.1529	9.0897	0.715	15.9442	0.6283	5.0756	43.8586	2.8944	5.1581	0.0088	2.3843	-0.2309	0.8571	0.1565	0.1758	-0.5505	1.4111	0.0955	0.1443	2.7604	0.8948	13.114	0.6724	5.9548
4-A	15201.4	12596.9	0.5342	0.5042	0	3.7795	0.4495	0.0481	23.5152	0.706	39.9896	0.4549	12.869	99.708	4.2945	7.2282	0.0045	3.1551	-0.2132	0.9037	0.214	0.2662	-0.1938	2.2926	0.1195	0.0656	20.0351	0.6797	31.2787	0.5218	8.3267	86.4873	3.7378	6.412	0.0059	2.9195	-0.2022	0.8703	0.1409	0.1259	-0.4344	1.0859	0.1255	0.0724	3.3747	0.7445	6.6039	0.5997	5.2094
5-C	7420.8	17323.8	0.3741	0.4681	0	3.5368	0.1915	0.1926	13.1335	0.8065	33.9335	0.6138	8.9878	86.1894	3.2944	5.5772	0.0087	2.5377	-0.3043	0.9287	0.1582	0.2352	-0.157	2.3523	0.0535	0.2096	11.4435	0.7596	23.7966	0.6485	6.1665	65.6461	2.9581	5.0898	0.0097	2.3844	-0.2891	0.9043	0.0893	0.1259	-0.5098	0.9497	0.0235	0.2699	1.8065	0.8595	6.431	0.761	3.2302
5-B	11267.7	16268.1	0.5598	0.5115	0	3.4504	0.4825	0.0591	17.3875	0.7878	40.9646	0.4774	13.548	101.256	4.2618	7.0981	0.005	2.9998	-0.2495	0.9299	0.2085	0.2439	-0.1812	2.4243	0.1375	0.0808	13.7517	0.7341	25.8576	0.5391	8.1536	69.7575	3.6535	6.2526	0.0063	2.7624	-0.2286	0.8925	0.1677	0.175	-0.6056	1.2828	0.1255	0.0835	3.5052	0.8668	13.1586	0.6267	6.3685
5-A	15182.7	15661.8	0.3944	0.4963	0	3.7804	0.1945	0.2226	11.6176	0.8467	37.8797	0.6708	9.5496	96.5016	3.1873	5.2155	0.0106	2.3015	-0.3669	0.95	0.1413	0.2344	-0.2158	2.4629	0.0315	0.2472	10.064	0.7871	23.6323	0.7095	5.4812	68.9616	2.7455	4.6537	0.0121	2.1198	-0.3426	0.9229	0.1241	0.1519	-0.5073	1.0477	0.0305	0.2472	2.0295	0.8915	9.35	0.7457	4.7565
6-C	7454.1	20025.7	0.4928	0.4493	0	3.6878	0.4425	0.0626	16.8947	0.7322	31.5413	0.4874	11.8519	74.1821	4.0607	6.8381	0.0052	2.9633	-0.236	0.9143	0.2052	0.2358	-0.1804	2.4503	0.1315	0.074	14.9332	0.6926	24.2909	0.5345	7.9846	64.3146	3.6909	6.2958	0.0062	2.8055	-0.2238	0.8893	0.1216	0.1232	-0.4904	1.1312	0.0975	0.1048	2.3796	0.8107	6.2842	0.6614	4.411
6-B	11103.4	19703.3	0.4255	0.4208	0	3.3355	0.3825	0.0611	17.1756	0.6886	27.5741	0.509	10.1029	67.6944	3.9154	6.5948	0.0057	2.8648	-0.2243	0.8975	0.1353	0.2028	-0.1735	2.1706	0.0735	0.112	13.0672	0.6362	17.9579	0.6093	4.9812	49.701	2.9112	5.2785	0.0082	2.4832	-0.1888	0.8125	0.1543	0.1455	-0.4066	1.0604	0.1265	0.0823	3.6981	0.7928	8.9244	0.6057	5.7943
6-A	15357	18262.2	0.6178	0.5678	0	3.7696	0.5355	0.044	29.0892	0.702	48.8117	0.4586	14.9084	119.914	4.4067	7.3141	0.0045	3.22	-0.2189	0.911	0.2285	0.2893	-0.1879	2.4548	0.1225	0.0681	24.29	0.6695	36.7489	0.5197	8.9371	100.403	3.8138	6.5496	0.0058	2.9994	-0.2071	0.88	0.1859	0.1509	-0.6056	1.3254	0.1825	0.0618	3.9244	0.7962	9.6267	0.6006	7.1216
7-B	11519.5	23450.1	0.3684	0.4323	0	3.4504	0.2625	0.1348	13.5595	0.7658	28.9484	0.5729	8.7721	73.1531	3.514	5.9727	0.0073	2.6649	-0.2696	0.9172	0.1283	0.1938	-0.2032	2.4389	0.0605	0.169	10.3811	0.6771	16.0749	0.635	4.8181	43.7525	2.8021	5.0221	0.0091	2.393	-0.2229	0.8435	0.1202	0.1497	-0.6441	1.083	0.0665	0.179	2.8258	0.8488	9.3467	0.6931	4.4593
7-A	15242.1	21438.1	0.589	0.5785	0	3.9971	0.5445	0.0874	23.5944	0.7687	51.0031	0.5273	14.2978	120.002	4.0876	6.764	0.006	2.9746	-0.28	0.9419	0.1956	0.2749	-0.19	2.2961	0.0815	0.1395	18.6425	0.7172	32.962	0.5875	7.66	89.3264	3.3236	5.8239	0.0076	2.7242	-0.2458	0.8947	0.2053	0.188	-0.557	1.5683	0.1925	0.0996	4.585	0.8461	14.8966	0.6119	8.0501
8-B	11664.3	26925.7	0.3854	0.4717	0	3.8664	0.2475	0.1324	16.0908	0.7675	34.6103	0.5573	9.1951	90.0591	3.5734	6.1053	0.0069	2.7613	-0.2561	0.9111	0.1516	0.221	-0.2187	2.5559	0.0725	0.1544	12.9599	0.6923	21.0589	0.6003	5.8143	57.0993	3.034	5.3824	0.008	2.5675	-0.2188	0.8537	0.1051	0.144	-0.4879	1.0987	0.0365	0.2457	2.5156	0.855	8.672	0.7351	3.8174
8-A	15314.2	25122.8	0.573	0.5483	0	3.5483	0.4975	0.0689	20.6785	0.7798	46.9548	0.4805	13.9058	115.132	4.2515	7.1334	0.005	3.0672	-0.2454	0.9275	0.204	0.2781	-0.2346	2.2721	0.0935	0.1302	17.04	0.7428	33.1285	0.5538	8.126	89.3453	3.4176	6.0226	0.0067	2.8103	-0.2172	0.8741	0.1823	0.2119	-0.382	1.3193	0.0965	0.1184	4.5231	0.8835	19.4096	0.6293	7.0192
[truncated: 124 more columns]
