# Supplementary material for: Evaluation of automatic discrimination between benign and malignant prostate tissue in the era of high precision digital pathology
Source: BMC Bioinformatics. 2023 Jan 3;24:1. doi: 10.1186/s12859-022-05124-9 (PMC9809030; doi:10.1186/s12859-022-05124-9)
Supplement: Supplementary file 5 — Additional file 5: Feature values for PIN-4 stain. [file 12859_2022_5124_MOESM5_ESM.xlsx]

## Sheet: RPX1
Name	Centroid X µm	Centroid Y µm	OD Sum: Mean	OD Sum: Std.dev.	OD Sum: Min	OD Sum: Max	OD Sum: Median	OD Sum: Haralick Angular second moment (F0)	OD Sum: Haralick Contrast (F1)	OD Sum: Haralick Correlation (F2)	OD Sum: Haralick Sum of squares (F3)	OD Sum: Haralick Inverse difference moment (F4)	OD Sum: Haralick Sum average (F5)	OD Sum: Haralick Sum variance (F6)	OD Sum: Haralick Sum entropy (F7)	OD Sum: Haralick Entropy (F8)	OD Sum: Haralick Difference variance (F9)	OD Sum: Haralick Difference entropy (F10)	OD Sum: Haralick Information measure of correlation 1 (F11)	OD Sum: Haralick Information measure of correlation 2 (F12)	Hematoxylin: Mean	Hematoxylin: Std.dev.	Hematoxylin: Min	Hematoxylin: Max	Hematoxylin: Median	Hematoxylin: Haralick Angular second moment (F0)	Hematoxylin: Haralick Contrast (F1)	Hematoxylin: Haralick Correlation (F2)	Hematoxylin: Haralick Sum of squares (F3)	Hematoxylin: Haralick Inverse difference moment (F4)	Hematoxylin: Haralick Sum average (F5)	Hematoxylin: Haralick Sum variance (F6)	Hematoxylin: Haralick Sum entropy (F7)	Hematoxylin: Haralick Entropy (F8)	Hematoxylin: Haralick Difference variance (F9)	Hematoxylin: Haralick Difference entropy (F10)	Hematoxylin: Haralick Information measure of correlation 1 (F11)	Hematoxylin: Haralick Information measure of correlation 2 (F12)	DAB: Mean	DAB: Std.dev.	DAB: Min	DAB: Max	DAB: Median	DAB: Haralick Angular second moment (F0)	DAB: Haralick Contrast (F1)	DAB: Haralick Correlation (F2)	DAB: Haralick Sum of squares (F3)	DAB: Haralick Inverse difference moment (F4)	DAB: Haralick Sum average (F5)
1-E	3047.7	2924.2	0.1748	0.3049	0	3.4827	0.0425	0.3313	6.025	0.7938	14.6089	0.719	3.6862	44.0473	2.1218	3.9214	0.0125	1.9837	-0.2537	0.8218	0.0974	0.1984	-0.4348	1.9221	0.0145	0.4172	5.4816	0.8402	17.1479	0.7713	3.5085	54.8081	1.928	3.4498	0.0151	1.7406	-0.3175	0.8512	0.0262	0.0619	-0.0631	1.8997	0.0095	0.6022	0.9676	0.681	1.5163	0.8845	0.5351
1-D	6967.5	2918.8	0.0892	0.2321	0	3.3595	0.0235	0.5546	4.1914	0.7487	8.3402	0.8408	1.623	27.1915	1.2369	2.3737	0.0188	1.3391	-0.253	0.7017	0.0165	0.0332	-0.1422	0.664	0.0055	0.7193	0.3067	0.5721	0.3584	0.9272	0.2999	1.0243	0.5227	1.1875	0.0241	0.6824	-0.239	0.5209	0.037	0.1206	-0.0105	1.9091	0.0095	0.6681	3.1902	0.7453	6.2616	0.8979	1.0246
1-C	9659.9	2692.5	0.1334	0.2298	0	3.7574	0.0395	0.3302	5.3543	0.6694	8.0966	0.729	2.677	22.667	1.8723	3.6563	0.0127	1.9221	-0.2079	0.7524	0.0289	0.0521	-0.1253	0.975	0.0065	0.5672	0.8638	0.5588	0.9789	0.866	0.7348	2.6461	0.9499	1.9374	0.0199	1.0796	-0.2254	0.6187	0.0481	0.092	-0.0214	1.9465	0.0155	0.4522	2.2716	0.6752	3.4965	0.8119	1.3891
1-B	13147.9	2604.5	0.2224	0.437	0	3.6963	0.0595	0.2636	13.1167	0.7746	29.1013	0.6925	4.7467	90.517	2.3755	4.3776	0.0113	2.212	-0.2371	0.8262	0.0337	0.0526	-0.1174	1.069	0.0115	0.5052	0.8684	0.5793	1.032	0.847	0.8117	2.7983	1.027	2.159	0.0184	1.1683	-0.2103	0.6242	0.1009	0.2392	-0.0214	2.0486	0.0235	0.3826	11.1517	0.7731	24.5783	0.7724	3.466
1-A	16283	2423.7	0.0716	0.1366	0	3.3306	0.0245	0.5061	2.827	0.492	2.7826	0.8149	1.137	7.3953	1.165	2.4189	0.0172	1.4557	-0.1445	0.553	0.0183	0.0403	-0.195	0.8344	0.0045	0.6842	0.6177	0.4509	0.5625	0.9027	0.3878	1.4878	0.6177	1.3852	0.0226	0.8627	-0.1622	0.4588	0.0234	0.0405	-0.0276	1.7116	0.0105	0.6466	0.6611	0.4444	0.5949	0.8911	0.3977
2-E	3026.3	6094.9	0.1344	0.2296	0	3.8154	0.0485	0.2982	4.7279	0.7089	8.1201	0.7241	2.6285	23.7248	1.8975	3.7299	0.0123	1.8993	-0.2153	0.7669	0.0292	0.0444	-0.1498	0.7087	0.0115	0.5479	0.5359	0.6157	0.6974	0.876	0.6437	1.9447	0.8873	1.8856	0.0201	0.9885	-0.2495	0.6409	0.0501	0.1044	-0.0185	1.9722	0.0175	0.4499	2.8873	0.6863	4.6022	0.8185	1.4329
2-D	6686.6	6222.1	0.1967	0.2828	0	3.7889	0.0865	0.1528	6.9117	0.719	12.3003	0.6126	4.0937	34.9518	2.6048	4.8973	0.0083	2.3448	-0.1775	0.7774	0.0785	0.1201	-0.154	1.6489	0.0295	0.2488	3.4985	0.718	6.2029	0.7129	2.5296	17.9642	2.0163	3.8614	0.0117	1.873	-0.2182	0.7763	0.0481	0.1116	-0.0442	2.0447	0.0195	0.4135	2.2379	0.785	5.2051	0.8084	1.2595
2-A	16946.3	5931.6	0.1902	0.3727	0	3.314	0.0375	0.3382	8.7834	0.7999	21.9461	0.7118	4.1027	68.551	2.1727	3.9823	0.0123	2.0718	-0.2357	0.806	0.0291	0.0494	-0.1504	1.2087	0.0065	0.5157	0.7627	0.5541	0.8552	0.8532	0.7156	2.2934	0.9534	2.0611	0.0187	1.1273	-0.1958	0.5952	0.0853	0.1998	-0.0262	1.8574	0.0165	0.433	6.6822	0.8091	17.5027	0.7883	2.9418
3-E	2902.7	9313.3	0.1466	0.2962	0	3.7097	0.0345	0.3424	6.659	0.7414	12.8771	0.7217	3.0045	39.266	1.9592	3.7074	0.0126	1.984	-0.2015	0.7466	0.0523	0.1233	-0.1306	1.9977	0.0085	0.4891	2.6277	0.7956	6.428	0.8186	1.6677	21.1198	1.3568	2.623	0.0173	1.4196	-0.2573	0.731	0.042	0.1247	-0.0559	2.0277	0.0105	0.5119	2.6596	0.7842	6.1626	0.8358	1.1786
3-D	7232.2	9673	0.1789	0.493	0	3.9678	0.0245	0.4742	10.1044	0.8494	33.5571	0.801	3.7504	113.954	1.6516	3.0014	0.0168	1.6541	-0.2707	0.7775	0.0213	0.0422	-0.2837	0.5688	0.0055	0.6609	0.4685	0.6184	0.614	0.9071	0.478	1.7891	0.708	1.486	0.0227	0.8214	-0.2539	0.5884	0.0882	0.2724	-0.0368	2.1262	0.0105	0.5665	9.0374	0.8486	29.8471	0.8464	3.0901
3-C	10092.6	9416.4	0.0838	0.1659	0	3.5514	0.0265	0.4506	3.4426	0.5849	4.1461	0.7957	1.4444	11.7433	1.3318	2.736	0.0159	1.5671	-0.1721	0.6268	0.0212	0.0451	-0.0745	1.1038	0.0045	0.6626	0.6977	0.525	0.7344	0.897	0.4568	2.0546	0.6794	1.4989	0.0221	0.9041	-0.1866	0.5076	0.0282	0.0559	-0.0239	1.9501	0.0095	0.5977	0.9886	0.5868	1.1962	0.872	0.6039
3-B	13523.5	9040.7	0.2542	0.4589	0	3.9035	0.0705	0.2085	11.6206	0.8198	32.2469	0.6591	5.6147	101.016	2.6567	4.8312	0.0099	2.3138	-0.2541	0.866	0.0532	0.1118	-0.1266	1.8868	0.0165	0.4114	2.1712	0.7967	5.3388	0.8214	1.5742	17.5907	1.4221	2.7628	0.0168	1.3595	-0.2877	0.7743	0.1057	0.2429	-0.0478	2.1357	0.0245	0.3533	9.2756	0.8173	25.3838	0.7618	3.713
3-A	17202.3	9554.5	0.1961	0.3755	0	3.3705	0.0465	0.3262	8.8717	0.8028	22.4887	0.7102	4.1644	70.1982	2.1087	3.9887	0.0121	2.0897	-0.2266	0.7963	0.076	0.1905	-0.2943	1.9021	0.0125	0.4966	3.7412	0.8818	15.8316	0.8125	2.6183	54.6032	1.5403	2.8185	0.0172	1.4859	-0.3013	0.7927	0.0543	0.1328	-0.0537	1.8157	0.0145	0.501	4.0979	0.7311	7.6206	0.821	1.6368
4-E	2657	12105.5	0.1325	0.4034	0	3.8347	0.0195	0.5625	6.8691	0.8511	23.0574	0.8401	2.6957	79.7172	1.3062	2.4581	0.0189	1.3927	-0.2932	0.7531	0.0147	0.034	-0.0887	0.5119	0.0025	0.7559	0.2743	0.634	0.3746	0.9367	0.3017	1.1249	0.5111	1.0815	0.025	0.6155	-0.2853	0.5474	0.0655	0.2224	-0.0182	2.0697	0.0085	0.6463	6.2503	0.8454	20.2177	0.8784	2.2125
4-D	6711.7	12676.1	0.7041	0.5848	0	3.6191	0.6785	0.0351	24.0392	0.7782	54.1962	0.3915	17.134	131.829	4.6082	7.8406	0.0034	3.3299	-0.2049	0.9104	0.4857	0.4213	-0.0174	2.4765	0.4385	0.0394	30.6309	0.7992	76.2868	0.3864	19.7221	189.418	4.7497	8.0146	0.0032	3.4599	-0.2206	0.9268	0.0456	0.0604	-0.0849	1.7935	0.0255	0.2835	1.1597	0.5718	1.3541	0.7667	1.1802
4-C	9921.8	12472.9	0.0963	0.2054	0	3.2208	0.0145	0.4819	4.3068	0.6626	6.3829	0.7956	1.8881	18.7066	1.4597	2.8169	0.0164	1.5966	-0.2098	0.6917	0.0204	0.0449	-0.295	0.6624	0.0025	0.665	0.6523	0.5333	0.6988	0.8966	0.4971	1.9307	0.724	1.5115	0.0222	0.8972	-0.2081	0.5399	0.0364	0.0855	-0.0115	1.7807	0.0055	0.5673	1.9043	0.6805	2.9797	0.8528	1.0401
4-B	13097.8	12059.5	0.1553	0.3078	0	3.5466	0.0375	0.3251	6.1145	0.7869	14.3459	0.7233	3.2544	44.8453	2.0455	3.8216	0.0125	1.9521	-0.2374	0.7986	0.0259	0.0425	-0.1387	0.5144	0.0065	0.5385	0.5437	0.552	0.6068	0.8713	0.5741	1.635	0.8318	1.8728	0.0197	1.011	-0.2039	0.5835	0.0666	0.1613	-0.0051	1.9653	0.0145	0.4196	4.2733	0.8056	10.9931	0.7978	2.176
4-A	17154.8	12346.5	0.1658	0.3305	0	3.8824	0.0495	0.3185	8.2402	0.7616	17.2802	0.7344	3.3574	53.9744	1.9861	3.8	0.0128	1.9422	-0.2454	0.8063	0.0245	0.0389	-0.2762	0.6644	0.0095	0.6044	0.3732	0.6409	0.5195	0.9008	0.4831	1.5094	0.7367	1.6129	0.0218	0.8397	-0.2679	0.6236	0.0766	0.1779	-0.0124	2.116	0.0215	0.4321	7.1672	0.7423	13.9056	0.7979	2.4646
5-E	2380.7	15328.4	0.2006	0.3676	0	3.8347	0.0625	0.225	10.1892	0.7538	20.6915	0.6618	4.2123	63.2229	2.4049	4.524	0.01	2.2888	-0.1946	0.7839	0.0458	0.0739	-0.2131	1.1483	0.0135	0.423	1.9541	0.5504	2.1733	0.7878	1.2891	5.6672	1.3512	2.7479	0.0154	1.5218	-0.1679	0.6214	0.0725	0.1829	-0.0327	2.0105	0.0205	0.4088	5.8731	0.7959	14.388	0.803	2.2943
5-D	6909.3	15638.4	0.1094	0.1974	0	3.2518	0.0355	0.3393	3.8182	0.6779	5.9272	0.7456	2.0559	17.3412	1.6693	3.3704	0.0132	1.7826	-0.1887	0.7066	0.0285	0.0511	-0.1385	0.6864	0.0075	0.5721	0.7426	0.6044	0.9386	0.8697	0.7023	2.6387	0.9194	1.9008	0.02	1.0491	-0.2272	0.6168	0.0335	0.0772	-0.0068	1.7229	0.0125	0.5376	1.6356	0.6698	2.4762	0.864	0.7671
5-C	9806.6	14872.9	0.0993	0.2386	0	3.6513	0	0.5298	4.5335	0.7342	8.5279	0.8161	2.072	26.4039	1.4615	2.6865	0.0178	1.492	-0.2691	0.7503	0.0404	0.0979	-0.136	1.8731	0	0.6031	1.8506	0.7603	3.8597	0.8578	1.3611	12.1477	1.1892	2.1505	0.0202	1.1801	-0.3143	0.7407	0.0222	0.0855	-0.0377	1.8384	0	0.7217	1.3983	0.7688	3.0245	0.9153	0.5739
5-B	13379.2	15204.3	0.0839	0.1676	0	3.715	0.0335	0.4467	2.4792	0.7092	4.2622	0.8028	1.3752	13.3153	1.2809	2.6745	0.016	1.4845	-0.1936	0.6561	0.0245	0.0506	-0.1048	1.2893	0.0085	0.6506	0.6839	0.6464	0.967	0.8954	0.5452	2.9357	0.7512	1.5824	0.0219	0.9101	-0.2327	0.5797	0.0249	0.0686	-0.0309	1.8807	0.0115	0.6864	0.9645	0.7533	1.9544	0.9142	0.4514
5-A	17118.2	15088.5	0.1731	0.254	0	3.6094	0.0625	0.2066	6.3366	0.6798	9.8936	0.6468	3.6849	26.4639	2.3977	4.542	0.0094	2.2456	-0.1914	0.7826	0.0943	0.1566	-0.0959	1.8773	0.0235	0.2882	5.3826	0.7434	10.4886	0.7088	3.3403	30.2414	2.2015	4.0388	0.0119	1.9928	-0.2548	0.8296	0.0227	0.0358	-0.0553	1.7535	0.0075	0.5524	0.4713	0.4211	0.407	0.8724	0.3595
6-E	2538.1	18281.4	0.2891	0.5494	0	3.8671	0.0445	0.2976	17.8338	0.8047	45.6504	0.6807	6.5779	138.932	2.5494	4.5761	0.0112	2.3468	-0.2566	0.8572	0.0365	0.0636	-0.1918	0.8779	0.0075	0.4983	1.0709	0.6431	1.5002	0.8393	1.0487	4.1615	1.1791	2.3222	0.0182	1.2256	-0.2454	0.6869	0.1373	0.2957	-0.0082	2.0604	0.0185	0.386	15.9036	0.7891	37.6953	0.7465	5.1386
6-D	6710.7	18464.8	0.2448	0.2461	0	3.5636	0.1575	0.0545	6.7886	0.6495	9.6839	0.5322	5.2623	24.894	3.1776	5.7233	0.0066	2.4991	-0.1498	0.7702	0.1088	0.1237	-0.0338	1.9267	0.0715	0.0981	3.8092	0.7198	6.7963	0.6237	3.6244	18.9373	2.6028	4.8258	0.0089	2.0921	-0.1874	0.7882	0.0414	0.0479	-0.0397	1.7984	0.0255	0.3457	0.8019	0.5592	0.9095	0.8069	0.8472
6-C	10097.4	18215.7	0.2286	0.487	0	3.6683	0.0285	0.4319	12.3396	0.831	36.5137	0.7484	5.1555	115.414	2.0906	3.6874	0.0146	1.9629	-0.2795	0.8334	0.0303	0.0635	-0.1713	0.696	0.0045	0.5799	1.1248	0.6245	1.4979	0.8584	0.8824	4.2777	1.0261	2.0117	0.0197	1.1378	-0.2269	0.6304	0.1054	0.2608	-0.0084	1.9356	0.0115	0.516	10.4856	0.8218	29.4254	0.811	3.9026
6-B	13456.5	18649.7	0.1225	0.2917	0	3.3462	0.0305	0.4549	6.414	0.7585	13.2778	0.7781	2.414	42.6185	1.5596	3.0136	0.0154	1.7255	-0.1999	0.6945	0.0278	0.0544	-0.1116	0.7335	0.0075	0.6101	1.0443	0.5287	1.1079	0.8672	0.6897	3.0147	0.8851	1.8145	0.0203	1.087	-0.184	0.5491	0.0444	0.1438	-0.0198	1.7556	0.0095	0.6351	3.7499	0.7912	8.9808	0.8789	1.3315
6-A	17063.8	18139.1	0.1766	0.3811	0	3.7854	0.0445	0.2928	9.1272	0.7921	21.9517	0.7161	3.7113	70.4519	2.0694	3.9593	0.012	2.0296	-0.2294	0.7977	0.0304	0.053	-0.1797	0.7825	0.0085	0.5461	0.7976	0.6079	1.017	0.8629	0.7639	2.8425	0.977	2.0146	0.0195	1.0897	-0.2356	0.641	0.0723	0.2013	-0.0124	1.9223	0.0165	0.4646	7.2577	0.7922	17.4663	0.8203	2.3648
7-E	2605	21409.6	0.2956	0.5329	0	3.6828	0.0485	0.2728	14.6785	0.8332	44.0003	0.6798	6.819	134.635	2.6668	4.7554	0.0111	2.3211	-0.2682	0.8758	0.1284	0.2769	-0.1242	2.0805	0.0175	0.3925	8.8193	0.8675	33.2896	0.7493	4.8195	109.033	2.1382	3.7683	0.0143	1.9053	-0.3012	0.8564	0.07	0.1717	-0.0647	1.8942	0.0115	0.4294	5.2774	0.7911	12.6287	0.8077	2.3971
7-D	6661.6	21762.8	0.1511	0.3495	0	3.7423	0.0425	0.3505	6.5912	0.819	18.2077	0.7497	2.9948	60.5355	1.7989	3.4974	0.0135	1.8398	-0.2277	0.7664	0.0263	0.046	-0.1671	0.8894	0.0095	0.6019	0.628	0.5862	0.7589	0.882	0.5876	2.1334	0.8205	1.7396	0.0208	0.9746	-0.2232	0.5903	0.0646	0.1879	-0.0199	2.019	0.0165	0.5116	5.0861	0.8296	14.9214	0.8401	2.0054
7-C	9817.1	21161.8	0.1149	0.2254	0	3.5891	0.0355	0.349	4.5041	0.7083	7.7215	0.7489	2.1982	23.4115	1.7037	3.3848	0.0134	1.7952	-0.1964	0.7179	0.0361	0.0754	-0.1428	1.8447	0.0075	0.5291	1.1959	0.7355	2.261	0.85	1.0046	7.1239	1.1038	2.2147	0.0188	1.1882	-0.2496	0.6806	0.0352	0.0966	-0.0451	1.8767	0.0105	0.5726	2.263	0.711	3.9148	0.8676	0.8746
7-B	13737.9	21603.1	0.4773	0.7014	0	4.201	0.0915	0.15	17.3266	0.8887	77.8179	0.5901	11.2123	234.517	3.227	5.7536	0.0077	2.6933	-0.2713	0.9128	0.3264	0.4996	-0.0883	2.5086	0.0515	0.1805	17.5806	0.9135	101.563	0.6355	12.6243	310.778	3.1723	5.4287	0.0093	2.539	-0.3212	0.9341	0.032	0.0627	-0.1336	2.0441	0.0115	0.5005	0.9849	0.6673	1.4803	0.8535	0.7762
7-A	16561.1	21119.6	0.0938	0.1508	0	2.3575	0.0395	0.3909	2.4937	0.6405	3.4679	0.7744	1.567	9.8372	1.4487	2.9826	0.0146	1.6146	-0.1846	0.6683	0.0343	0.0685	-0.0824	1.3017	0.0095	0.5634	1.0744	0.7116	1.8627	0.8615	0.9009	5.7741	1.0266	2.0585	0.0196	1.1237	-0.2527	0.6652	0.0238	0.0348	-0.0391	1.3739	0.0135	0.6362	0.4124	0.5139	0.4242	0.9	0.3342
8-E	2966.1	24444.9	0.2409	0.4772	0	3.8476	0.0415	0.3335	10.3876	0.8527	35.2494	0.726	5.4132	112.344	2.333	4.1689	0.013	2.0479	-0.2889	0.8669	0.0402	0.0768	-0.2368	1.0431	0.0085	0.5266	1.435	0.6894	2.3101	0.8413	1.2082	6.7504	1.227	2.3404	0.0187	1.2461	-0.2613	0.7073	0.1056	0.2382	-0.0056	1.9359	0.0165	0.4219	7.5436	0.8469	24.6422	0.7933	3.8533
8-D	6903.4	24509.4	0.1168	0.2468	0	3.7305	0.0355	0.3732	4.966	0.7283	9.1392	0.7522	2.2389	28.4154	1.6917	3.3052	0.0138	1.7929	-0.1968	0.712	0.0374	0.081	-0.1189	1.6148	0.0085	0.5239	1.4413	0.7286	2.6552	0.8419	1.0509	8.3901	1.1218	2.2603	0.0184	1.243	-0.2299	0.6621	0.0351	0.1089	-0.0427	2.0045	0.0115	0.5729	2.4541	0.7532	4.971	0.8707	0.8587
8-C	10069.3	24358.9	0.1335	0.2588	0	3.7555	0.0445	0.3195	4.6315	0.7644	9.8285	0.7392	2.5966	30.6418	1.8503	3.6014	0.0129	1.8332	-0.2271	0.773	0.0312	0.0508	-0.177	1.3296	0.0095	0.5184	0.7999	0.5713	0.9329	0.8555	0.7463	2.5352	0.9714	2.0756	0.0189	1.1233	-0.2106	0.6171	0.0489	0.1272	-0.0187	1.9893	0.0155	0.4866	2.6568	0.7988	6.6028	0.8419	1.3908
8-B	13294.7	24487	0.1059	0.2033	0	3.196	0.0355	0.3791	4.0415	0.6832	6.3778	0.7612	1.9108	19.1602	1.5223	3.1458	0.014	1.7363	-0.1823	0.6802	0.0274	0.0528	-0.1825	0.8589	0.0085	0.6328	0.89	0.5731	1.0424	0.8798	0.6598	2.9306	0.8519	1.7208	0.0211	1.0091	-0.2215	0.5863	0.0357	0.0836	-0.0158	1.7759	0.0135	0.5597	1.6905	0.7121	2.9362	0.8614	0.8544
8-A	17154.8	23941.6	0.2103	0.4782	0	3.8012	0.0425	0.3736	12.0838	0.8222	33.9724	0.7444	4.505	110.385	2.0235	3.7199	0.0137	1.968	-0.2648	0.8213	0.0311	0.0571	-0.1835	0.7228	0.0085	0.5682	0.8259	0.658	1.2072	0.8655	0.8284	3.4893	1.003	1.9885	0.0199	1.0775	-0.2529	0.6581	0.0957	0.2564	-0.0081	2.0296	0.0175	0.4954	10.8109	0.807	28.0117	0.8172	3.3476
9-D	6626.8	27217.2	0.1017	0.2709	0	3.4722	0.0155	0.5004	4.2986	0.805	11.0242	0.8091	2.0153	36.8673	1.4221	2.7005	0.0171	1.5153	-0.2333	0.7106	0.0212	0.0446	-0.1447	0.7824	0.0035	0.6446	0.6055	0.559	0.6865	0.8933	0.4996	1.9285	0.732	1.5697	0.0217	0.9132	-0.2107	0.5512	0.0401	0.1433	-0.0168	1.9939	0.0055	0.6292	2.7418	0.842	8.678	0.8849	1.196
9-C	9796.4	27126.2	0.116	0.2203	0	3.2414	0.0145	0.3911	3.5287	0.7585	7.3051	0.7782	2.3952	21.9892	1.7741	3.2943	0.0151	1.645	-0.2809	0.8097	0.0498	0.1149	-0.1113	1.8801	0.0035	0.5053	2.0815	0.8102	5.4821	0.8412	1.6466	17.9062	1.3978	2.5535	0.0185	1.2829	-0.3314	0.7961	0.0256	0.0603	-0.0431	1.7593	0.0025	0.5943	0.9445	0.6686	1.4251	0.8914	0.5731
9-B	13321.3	27208.8	0.1994	0.2798	0	3.5762	0.0825	0.1701	5.6873	0.768	12.2573	0.636	4.2365	35.0421	2.6002	4.8137	0.009	2.2349	-0.2208	0.8308	0.1031	0.178	-0.0719	2.1269	0.0295	0.2617	5.1621	0.8127	13.7801	0.7093	3.6263	42.7716	2.2877	4.1515	0.0117	1.9685	-0.2763	0.8544	0.0321	0.05	-0.0721	1.8652	0.0175	0.4563	0.6545	0.6522	0.9409	0.8475	0.5978
9-A	16929.4	26845	0.1513	0.3016	0	3.6998	0.0405	0.3244	5.5707	0.7983	13.808	0.7304	3.0866	43.8241	1.9479	3.7246	0.0127	1.9024	-0.2339	0.7873	0.0585	0.1374	-0.2489	1.8648	0.0105	0.4928	2.6528	0.8357	8.0726	0.8219	1.9193	27.0069	1.4321	2.6866	0.0175	1.4062	-0.2894	0.7692	0.0389	0.1171	-0.0475	1.9466	0.0125	0.5314	2.4717	0.7845	5.7342	0.8657	0.986
[truncated: 130 more columns]

## Sheet: RPX2
Name	Centroid X µm	Centroid Y µm	OD Sum: Mean	OD Sum: Std.dev.	OD Sum: Min	OD Sum: Max	OD Sum: Median	OD Sum: Haralick Angular second moment (F0)	OD Sum: Haralick Contrast (F1)	OD Sum: Haralick Correlation (F2)	OD Sum: Haralick Sum of squares (F3)	OD Sum: Haralick Inverse difference moment (F4)	OD Sum: Haralick Sum average (F5)	OD Sum: Haralick Sum variance (F6)	OD Sum: Haralick Sum entropy (F7)	OD Sum: Haralick Entropy (F8)	OD Sum: Haralick Difference variance (F9)	OD Sum: Haralick Difference entropy (F10)	OD Sum: Haralick Information measure of correlation 1 (F11)	OD Sum: Haralick Information measure of correlation 2 (F12)	Hematoxylin: Mean	Hematoxylin: Std.dev.	Hematoxylin: Min	Hematoxylin: Max	Hematoxylin: Median	Hematoxylin: Haralick Angular second moment (F0)	Hematoxylin: Haralick Contrast (F1)	Hematoxylin: Haralick Correlation (F2)	Hematoxylin: Haralick Sum of squares (F3)	Hematoxylin: Haralick Inverse difference moment (F4)	Hematoxylin: Haralick Sum average (F5)	Hematoxylin: Haralick Sum variance (F6)	Hematoxylin: Haralick Sum entropy (F7)	Hematoxylin: Haralick Entropy (F8)	Hematoxylin: Haralick Difference variance (F9)	Hematoxylin: Haralick Difference entropy (F10)	Hematoxylin: Haralick Information measure of correlation 1 (F11)	Hematoxylin: Haralick Information measure of correlation 2 (F12)	DAB: Mean	DAB: Std.dev.	DAB: Min	DAB: Max	DAB: Median	DAB: Haralick Angular second moment (F0)	DAB: Haralick Contrast (F1)	DAB: Haralick Correlation (F2)	DAB: Haralick Sum of squares (F3)	DAB: Haralick Inverse difference moment (F4)	DAB: Haralick Sum average (F5)
9-A	3658.9	4432.1	0.4316	0.6024	0	4.1429	0.0745	0.2012	21.3852	0.8053	54.93	0.5748	10.2556	147.38	3.2945	5.7776	0.0077	2.8139	-0.2368	0.8849	0.0641	0.1419	-0.1159	1.6995	0	0.4159	6.0774	0.627	8.1468	0.7493	2.437	22.5786	1.769	3.2928	0.0143	1.8509	-0.181	0.6877	0.271	0.3934	-0.6132	2.3633	0.0465	0.2059	22.3093	0.835	67.6011	0.5999	10.7706
9-B	6374.3	3570.6	0.1435	0.2631	0	3.6528	0.0085	0.3806	6.1856	0.7038	10.44	0.7303	3.1404	29.2482	1.9716	3.6294	0.0134	1.9401	-0.2206	0.7668	0.0791	0.1417	-0.013	1.3802	0.0045	0.3988	5.3439	0.6799	8.3457	0.7412	2.8564	22.7222	1.8839	3.4655	0.0139	1.8667	-0.2219	0.7574	0.0101	0.0329	-0.0555	0.8055	0	0.8441	0.2064	0.7177	0.3656	0.9613	0.1828
9-C	9729.3	3526.5	0.3632	0.5244	0	4.0101	0.0705	0.1948	17.9003	0.7868	41.9838	0.5797	8.5778	114.74	3.2009	5.6457	0.0077	2.7454	-0.2176	0.861	0.0938	0.1547	-0.0879	1.4409	0.0125	0.2919	7.0293	0.6489	10.0101	0.685	3.4299	26.3037	2.2134	4.1212	0.0112	2.1425	-0.1883	0.7533	0.172	0.3058	-0.4996	2.3852	0.0225	0.2848	15.1477	0.812	40.2843	0.6706	6.6609
9-D	13206.1	3318.9	0.1121	0.244	0	3.9242	0.0015	0.5009	3.9258	0.7788	8.8718	0.7996	2.4591	27.1977	1.6179	2.8923	0.0169	1.554	-0.2714	0.7698	0.0324	0.0817	-0.0748	1.3803	0	0.6011	2.201	0.5772	2.6027	0.8526	1.0604	7.3417	1.0781	2.0593	0.0198	1.2256	-0.2019	0.6036	0.0493	0.148	-0.0496	1.81	0	0.6897	2.9985	0.8377	9.2398	0.8854	1.8389
9-E	17371.4	2277.1	0.1237	0.3613	0	3.9522	0	0.5313	9.3481	0.7424	18.1472	0.8015	2.7525	57.608	1.5799	2.7957	0.0175	1.6294	-0.2294	0.7146	0.0555	0.1376	-0.0291	1.4489	0	0.5438	5.1473	0.6724	7.8546	0.8092	2.0453	23.152	1.4704	2.6425	0.0178	1.5298	-0.2204	0.6894	0.0171	0.0752	-0.0487	0.9219	0	0.8516	1.1107	0.7595	2.3086	0.9492	0.5437
8-A	3789.5	7030.6	0.1354	0.2871	0	3.694	0	0.4791	7.5186	0.6977	12.4346	0.7683	3.0771	35.5258	1.7946	3.1989	0.0158	1.7829	-0.241	0.7612	0.0713	0.1511	-0.022	1.4606	0	0.4968	6.0802	0.6785	9.4547	0.7797	2.6854	26.5721	1.6936	3.0185	0.0164	1.6952	-0.2412	0.7475	0.0142	0.0411	-0.2118	0.7957	0	0.7667	0.4226	0.6491	0.6022	0.9376	0.301
8-B	6220.6	6966	0.1846	0.3382	0	3.3518	0.0035	0.3946	6.7861	0.8061	17.5011	0.7359	4.247	51.4821	2.1512	3.7868	0.0138	1.9257	-0.2856	0.8444	0.0379	0.0936	-0.1043	1.2101	0	0.5728	2.6059	0.6218	3.4452	0.8377	1.3038	9.8887	1.1936	2.2635	0.019	1.3214	-0.2155	0.6448	0.1028	0.2192	-0.0279	2.3843	0	0.4579	7.1188	0.8264	20.5003	0.7791	3.9326
8-C	9566.6	6436.2	0.4507	0.796	0	4.472	0.0425	0.2507	19.0755	0.8811	80.2286	0.6545	10.2686	245.516	3.0169	5.0687	0.0104	2.4698	-0.3102	0.9175	0.1605	0.2612	-0.0432	1.7383	0.0115	0.2968	9.3297	0.8418	29.4828	0.674	6.3056	85.87	2.6757	4.6458	0.0111	2.2405	-0.2905	0.8892	0.1015	0.199	-0.047	1.6074	0.0045	0.4214	4.7596	0.8598	16.9724	0.7802	3.8068
8-D	13277.9	5835.1	0.1279	0.3425	0	3.87	0.0015	0.499	8.0457	0.7639	17.0412	0.7919	2.8304	54.3199	1.6588	2.9737	0.0168	1.674	-0.2334	0.7347	0.0578	0.1329	-0.0294	1.5361	0	0.5196	4.5518	0.6893	7.3241	0.802	2.0809	21.5802	1.5118	2.7458	0.0173	1.557	-0.222	0.7011	0.0185	0.0768	-0.0595	1.0419	0	0.8288	1.0748	0.7761	2.3998	0.9435	0.5901
8-E	17208.6	5082.3	0.1129	0.2809	0	3.7993	0	0.4862	7.0367	0.6956	11.5563	0.783	2.5075	34.7191	1.6649	2.9984	0.0163	1.698	-0.2194	0.7188	0.0557	0.121	-0.0243	1.7383	0	0.4926	4.2407	0.6422	5.9251	0.7906	2.0242	16.5476	1.5569	2.8416	0.0166	1.6039	-0.2153	0.7004	0.0127	0.0559	-0.0515	0.888	0	0.8635	0.701	0.7163	1.2351	0.9557	0.3513
7-A	3830.9	10025.8	0.1487	0.3212	0	3.8833	0.0105	0.3582	7.6793	0.7337	14.4164	0.7233	3.2117	43.5291	2.0105	3.7103	0.0129	1.9953	-0.2065	0.7534	0.0726	0.1429	-0.0587	1.6963	0.0025	0.418	5.6053	0.6703	8.4996	0.7508	2.6258	23.8174	1.8187	3.3378	0.0144	1.8303	-0.2099	0.7321	0.0214	0.0708	-0.0442	1.4736	0	0.7464	0.9365	0.7706	2.0416	0.9252	0.5332
7-B	6581.4	9733	0.0449	0.1944	0	3.5141	0	0.8182	3.3294	0.7073	5.6866	0.926	1.0283	18.4609	0.7041	1.183	0.0257	0.7466	-0.3069	0.5888	0.0222	0.095	-0.0213	1.4332	0	0.8266	2.3772	0.6806	3.7211	0.9306	0.8361	11.8715	0.655	1.1001	0.026	0.6981	-0.3076	0.5724	0.0055	0.0318	-0.5646	0.7751	0	0.9143	0.2502	0.6616	0.3697	0.9755	0.1508
7-C	9497.6	8947.6	0.3097	0.4985	0	4.1696	0.0615	0.2098	12.4277	0.8319	36.9574	0.6122	7.1863	109.678	3.003	5.2776	0.0086	2.5285	-0.2459	0.8749	0.0828	0.1584	-0.1116	1.5859	0.0045	0.3457	5.813	0.723	10.4921	0.7137	3.0467	30.4527	2.0248	3.7469	0.0125	1.9929	-0.1981	0.7432	0.1412	0.2735	-0.0398	2.4148	0.0165	0.3353	10.0944	0.8417	31.8855	0.7184	5.378
7-D	13147.9	8615	0.2221	0.2807	0	2.994	0.1055	0.1616	8.7259	0.6364	11.9997	0.5827	4.9971	28.5365	2.8427	5.1868	0.0076	2.5178	-0.1828	0.8015	0.0632	0.1143	-0.0558	1.3134	0.0075	0.3672	4.8108	0.5464	5.3023	0.732	2.1668	13.4739	1.7504	3.3911	0.0132	1.8912	-0.1586	0.66	0.1019	0.1496	-0.036	1.6072	0.0365	0.2215	5.5995	0.7035	9.4427	0.6661	3.6744
7-E	17079.7	7788.5	0.1393	0.3694	0	3.8009	0	0.476	10.5092	0.7329	19.6737	0.7711	3.1347	61.2116	1.7587	3.1499	0.0158	1.8144	-0.2084	0.7168	0.0601	0.1432	-0.038	1.4805	0	0.5217	5.7804	0.6595	8.4888	0.7941	2.2513	24.4631	1.5589	2.7965	0.0171	1.6205	-0.2076	0.6865	0.0236	0.0826	-0.0402	1.02	0	0.7499	1.4222	0.7428	2.7651	0.9165	0.7481
6-A	3837.9	13114.3	0.1429	0.3561	0	3.9522	0	0.4613	9.318	0.7393	17.8674	0.774	3.1926	55.0317	1.8195	3.2528	0.0159	1.7885	-0.2391	0.7629	0.0668	0.1581	-0.0313	1.7772	0	0.511	6.27	0.7016	10.505	0.7939	2.4905	31.241	1.6238	2.9087	0.017	1.6339	-0.2355	0.7318	0.0232	0.069	-0.6919	0.9997	0	0.6765	0.9967	0.735	1.8802	0.9071	0.6366
6-B	6561.6	12518.7	0.2393	0.3877	0	3.9625	0.0185	0.3043	9.3745	0.7981	23.2125	0.6704	5.5605	65.5084	2.5435	4.4912	0.011	2.2534	-0.2485	0.8446	0.0662	0.1278	-0.0968	1.755	0	0.4181	4.6887	0.6464	6.6292	0.7536	2.3986	18.0166	1.7536	3.2511	0.0145	1.7908	-0.2016	0.7132	0.111	0.232	-0.0558	2.2274	0.0085	0.4125	8.0727	0.8265	23.267	0.7599	4.1904
6-C	9608.1	11468.3	0.109	0.3609	0	3.9298	0	0.6182	8.6962	0.7541	17.6784	0.8389	2.4302	57.3141	1.3381	2.3339	0.0199	1.4063	-0.2416	0.685	0.051	0.1518	-0.0171	1.699	0	0.6269	5.5237	0.7163	9.7333	0.8436	1.899	30.5322	1.265	2.2395	0.0201	1.3409	-0.2361	0.6683	0.0158	0.0707	-0.0473	1.091	0	0.8326	0.9204	0.773	2.0271	0.9468	0.5021
6-D	13556.7	11224.4	0.0623	0.173	0	3.7761	0	0.5941	3.0494	0.6379	4.2103	0.841	1.3023	12.4843	1.1848	2.184	0.0195	1.3046	-0.2097	0.6297	0.0357	0.0913	-0.0173	1.5309	0	0.5932	2.6212	0.6025	3.297	0.8429	1.2278	9.4069	1.1676	2.1644	0.0195	1.2836	-0.2135	0.6322	0.0034	0.0214	-0.0481	0.745	0	0.9523	0.0745	0.7636	0.1576	0.9879	0.0483
6-E	16575.3	10646.1	0.1711	0.4006	0	3.901	0	0.3771	11.8091	0.7428	22.9559	0.7187	3.8557	70.4792	2.0882	3.7604	0.0131	2.0824	-0.1989	0.7467	0.0777	0.1672	-0.0488	1.6433	0	0.4142	7.2405	0.6926	11.7759	0.7427	2.8951	34.3033	1.8783	3.4264	0.0141	1.9042	-0.1955	0.7192	0.0281	0.0843	-0.0298	1.2296	0	0.6862	1.4206	0.7515	2.8584	0.8982	0.8728
5-A	3666	15870.3	0.2703	0.428	0	4.2143	0.0235	0.2992	13.2174	0.764	28	0.6581	6.335	75.7734	2.6518	4.6982	0.0107	2.3782	-0.2517	0.8585	0.0481	0.1156	-0.0953	1.6425	0	0.5015	3.8602	0.642	5.3918	0.8027	1.7184	15.595	1.4245	2.6944	0.0169	1.5412	-0.2029	0.6706	0.159	0.2798	-0.0257	2.3182	0.0115	0.3438	14.1158	0.7919	33.913	0.7015	6.2203
5-B	6869.5	15329.5	0.0767	0.356	0	4.0681	0	0.7684	5.5992	0.8177	15.3552	0.91	1.6418	53.4512	0.8426	1.4245	0.0245	0.8962	-0.2906	0.6173	0.0328	0.1443	-0.0471	1.8079	0	0.7878	3.8894	0.7806	8.8647	0.9142	1.2356	30.2138	0.7818	1.3358	0.0248	0.847	-0.2756	0.587	0.0136	0.0714	-0.0411	1.0154	0	0.8746	0.753	0.8196	2.0875	0.9606	0.4659
5-C	10304.4	14383.3	0.2477	0.366	0	3.9754	0.0495	0.231	11.1673	0.7299	20.6687	0.6222	5.6901	54.9205	2.7765	4.9866	0.0091	2.4736	-0.2173	0.8355	0.0433	0.1036	-0.0905	1.6338	0	0.5096	3.6107	0.5743	4.2403	0.8041	1.5221	11.6885	1.3453	2.5912	0.017	1.5284	-0.174	0.6191	0.1487	0.2528	-0.0219	2.1049	0.0235	0.2743	11.5268	0.7919	27.698	0.6719	5.6908
5-D	13627.6	14269.7	0.095	0.2341	0	3.9832	0.0015	0.4922	4.9343	0.6906	7.9734	0.7983	1.9842	24.1525	1.5017	2.8033	0.0167	1.581	-0.2235	0.7078	0.0373	0.0994	-0.0705	1.9786	0	0.5967	2.788	0.652	4.0057	0.8478	1.2461	12.0367	1.141	2.1515	0.0196	1.2695	-0.2198	0.638	0.0264	0.0782	-0.0255	1.683	0	0.6671	1.5117	0.6902	2.4395	0.8938	0.8022
5-E	16864	13757.8	0.0892	0.2924	0	3.986	0	0.5973	6.7309	0.7198	12.0114	0.8337	1.9609	38.3128	1.305	2.3357	0.0193	1.4153	-0.213	0.6497	0.0425	0.1282	-0.04	1.5794	0	0.6247	4.54	0.6686	6.8504	0.8466	1.5531	20.9476	1.1949	2.1528	0.0201	1.309	-0.2109	0.627	0.0131	0.0578	-0.0402	1.3599	0	0.8335	0.69	0.7376	1.3145	0.9488	0.385
4-A	3190.4	18323.4	0.1438	0.3455	0	3.6986	0	0.4671	9.9871	0.7213	17.9162	0.7649	3.265	54.1935	1.8335	3.2723	0.0155	1.8396	-0.2289	0.7521	0.0667	0.1464	-0.0164	1.537	0	0.4793	5.5847	0.6869	8.9185	0.7785	2.4559	25.8345	1.6776	3.0342	0.016	1.6974	-0.2258	0.73	0.0217	0.0683	-0.0291	0.7834	0	0.7505	1.0427	0.7154	1.8321	0.9184	0.6438
4-B	6063.2	18207.4	0.4536	0.6446	0	4.2849	0.0855	0.1846	22.76	0.8086	59.4663	0.5668	10.6337	162.143	3.3777	5.9094	0.0074	2.862	-0.2301	0.8832	0.0983	0.207	-0.1045	1.8584	0.0015	0.3748	10.1501	0.7191	18.0668	0.7058	3.8062	52.8597	2.1139	3.8246	0.0127	2.1275	-0.1831	0.7283	0.2393	0.3548	-0.04	2.3833	0.0405	0.219	15.8272	0.8563	55.0795	0.6197	9.3684
4-C	9971.1	17179.3	0.1098	0.3413	0	3.8718	0	0.5998	8.0126	0.7545	16.3172	0.8322	2.451	52.5395	1.3943	2.4443	0.0194	1.4407	-0.2506	0.7067	0.0525	0.1469	-0.0102	1.6274	0	0.6061	5.0987	0.7196	9.0903	0.8377	1.9283	28.3428	1.3146	2.3399	0.0196	1.3709	-0.2469	0.6917	0.0146	0.0631	-0.5224	0.8001	0	0.8318	0.7722	0.7558	1.5809	0.9472	0.4586
4-D	12907.3	17286.9	0.1024	0.2588	0	4.0536	0	0.5204	5.639	0.7057	9.5802	0.7989	2.2448	28.9926	1.5461	2.7865	0.0172	1.5918	-0.231	0.716	0.055	0.1265	-0.0344	1.7928	0	0.5235	4.2349	0.6783	6.5813	0.8038	1.9763	19.232	1.4874	2.7044	0.0174	1.5373	-0.2317	0.7095	0.0086	0.0391	-0.0783	1.1336	0	0.8668	0.3014	0.7343	0.5672	0.9637	0.1962
4-E	16353.4	16595.7	0.1929	0.5114	0	4.1843	0	0.4801	14.5468	0.7966	35.7652	0.7681	4.4239	114.555	1.9017	3.2781	0.0159	1.869	-0.2393	0.7649	0.0821	0.2023	-0.054	1.9603	0	0.5005	8.478	0.7573	17.4641	0.7787	3.174	54.0945	1.7525	3.0865	0.0164	1.7464	-0.2296	0.739	0.033	0.1027	-0.0291	1.4622	0	0.7138	1.7679	0.7941	4.2936	0.8999	1.1612
3-A	3173.6	21166.2	0.1732	0.4411	0	4.0504	0	0.4954	11.9472	0.7817	27.3606	0.7802	3.9531	86.1871	1.8407	3.2051	0.0164	1.7822	-0.2647	0.7864	0.0604	0.1556	-0.0794	1.6188	0	0.5532	5.6388	0.7231	10.1816	0.8143	2.2565	31.2467	1.4809	2.6495	0.0181	1.5157	-0.2422	0.7157	0.049	0.1498	-0.0496	2.0504	0	0.6767	3.7332	0.8035	9.5013	0.8788	1.7942
3-B	6284.5	20880.1	0.1573	0.5298	0	4.0536	0	0.6228	11.7825	0.8221	33.1145	0.8476	3.437	111.199	1.3883	2.3224	0.0205	1.3735	-0.2991	0.7446	0.0626	0.1904	-0.0174	1.6894	0	0.6317	6.8271	0.7802	15.5317	0.8457	2.4233	50.5803	1.3288	2.3086	0.0203	1.3463	-0.2774	0.7215	0.028	0.1124	-0.1994	0.9512	0	0.8113	2.0974	0.8015	5.2827	0.933	1.023
3-C	9609.3	20068.4	0.1636	0.2509	0	3.7529	0.0505	0.2192	7.0765	0.6244	9.4188	0.6431	3.4826	24.502	2.3593	4.4636	0.0094	2.2791	-0.1626	0.7316	0.077	0.1303	-0.0491	1.4051	0.0155	0.32	5.6924	0.5983	7.0848	0.7043	2.6613	18.4651	1.969	3.7589	0.0119	2.0275	-0.168	0.6981	0.0337	0.0783	-0.0685	1.5342	0.0055	0.5688	1.5452	0.6882	2.478	0.8627	0.8955
3-D	12801.2	20114.9	0.1695	0.3727	0	4.2532	0.0055	0.3945	8.9428	0.7712	19.5389	0.7381	3.79	59.8343	2.0651	3.6896	0.0139	1.9553	-0.2493	0.8027	0.0599	0.1426	-0.0749	1.9091	0	0.4957	5.2737	0.6874	8.4344	0.7928	2.1571	25.1309	1.5581	2.8667	0.0166	1.6245	-0.2195	0.7072	0.0545	0.1525	-0.6472	1.8426	0	0.6129	3.5971	0.8174	9.8513	0.858	1.9637
3-E	16270.6	19884.4	0.1058	0.2977	0	3.771	0	0.5572	7.9946	0.694	13.0622	0.8096	2.3948	39.9133	1.5038	2.665	0.0181	1.5709	-0.2195	0.6904	0.0494	0.1229	-0.0148	1.7455	0	0.5596	4.5945	0.6282	6.1789	0.8168	1.8083	17.6556	1.3889	2.5125	0.0183	1.4772	-0.2119	0.6659	0.0133	0.0585	-0.0369	0.8586	0	0.8446	0.7899	0.7056	1.3414	0.9485	0.4205
2-A	3323.3	24008.1	0.187	0.4968	0	4.1696	0	0.45	11.7444	0.8223	33.0476	0.7622	4.2109	108.101	1.9119	3.3571	0.0153	1.8723	-0.2471	0.7789	0.0778	0.1764	-0.0196	1.6311	0	0.456	6.2246	0.7638	13.1753	0.7663	2.9286	40.526	1.7962	3.2286	0.0154	1.7724	-0.2327	0.753	0.0315	0.1113	-0.0414	0.902	0	0.7852	1.7381	0.8314	5.1531	0.9238	1.1127
2-B	6089.2	23457	0.0946	0.2064	0	3.3425	0	0.4795	4.4709	0.6414	6.2331	0.7855	2.0351	17.5501	1.5671	2.8979	0.0162	1.6377	-0.2103	0.697	0.0488	0.1109	-0.0567	1.3357	0	0.5151	3.9067	0.6058	4.9546	0.8026	1.7289	13.7477	1.426	2.6529	0.0172	1.5381	-0.1999	0.6608	0.0138	0.0495	-0.0315	1.5056	0	0.7993	0.5198	0.7214	0.9329	0.9443	0.3324
2-D	12532.9	22845.3	0.1167	0.2697	0	3.8341	0	0.4695	7.0491	0.6731	10.78	0.7689	2.5693	31.4523	1.7144	3.1089	0.0156	1.7733	-0.205	0.7091	0.0624	0.1295	-0.0079	1.4192	0	0.4679	5.2985	0.6166	6.9088	0.7726	2.232	18.8694	1.643	3.0228	0.0157	1.7205	-0.2001	0.6954	0.0093	0.0454	-0.0631	0.8586	0	0.8709	0.4236	0.7287	0.7805	0.9616	0.2563
2-E	16069.3	22976.3	0.1376	0.3961	0	3.87	0	0.5498	11.4599	0.7448	22.4503	0.8023	3.1616	70.7905	1.6195	2.8121	0.0178	1.6479	-0.2352	0.723	0.0585	0.1481	-0.017	1.5961	0	0.5558	5.752	0.6853	9.1383	0.8104	2.1995	27.1519	1.4826	2.6355	0.0181	1.5324	-0.2254	0.6949	0.021	0.0817	-0.0628	0.8738	0	0.804	1.3858	0.743	2.696	0.931	0.7181
1-A	3190.3	26813.8	0.0967	0.2448	0	3.6658	0	0.5242	6.1642	0.6551	8.9368	0.7972	2.1211	26.2746	1.4955	2.7408	0.0171	1.6189	-0.1929	0.6608	0.0384	0.1044	-0.0757	1.3802	0	0.5897	4.1756	0.5263	4.4073	0.8327	1.346	12.0612	1.1886	2.231	0.0191	1.3883	-0.1661	0.5707	0.0293	0.115	-0.0505	2.3564	0	0.7491	2.306	0.7924	5.5543	0.9139	0.9958
1-B	6039.9	26320.8	0.0473	0.1931	0	4.1599	0	0.7534	2.6055	0.7495	5.2014	0.9077	1.0201	17.2978	0.8248	1.4519	0.0241	0.8822	-0.2889	0.6207	0.0241	0.0905	-0.0344	1.7602	0	0.766	1.9486	0.7074	3.3295	0.9121	0.8626	10.7185	0.7762	1.3648	0.0244	0.8368	-0.2851	0.6021	0.0052	0.0323	-0.1811	0.8023	0	0.9401	0.1669	0.7912	0.3997	0.9837	0.1167
1-E	15576	26370.3	0.1055	0.3129	0	3.7761	0	0.5442	7.1359	0.7461	14.0524	0.8156	2.2866	45.1485	1.4524	2.6318	0.018	1.5261	-0.2322	0.7029	0.05	0.1247	-0.0152	1.4706	0	0.5542	3.9926	0.6903	6.4459	0.8213	1.7613	19.461	1.3623	2.5013	0.0183	1.4443	-0.2247	0.6812	0.012	0.0614	-0.0476	0.9065	0	0.8946	0.736	0.7569	1.5138	0.9636	0.3847
[truncated: 130 more columns]

## Sheet: RPX3
Name	Centroid X µm	Centroid Y µm	OD Sum: Mean	OD Sum: Std.dev.	OD Sum: Min	OD Sum: Max	OD Sum: Median	OD Sum: Haralick Angular second moment (F0)	OD Sum: Haralick Contrast (F1)	OD Sum: Haralick Correlation (F2)	OD Sum: Haralick Sum of squares (F3)	OD Sum: Haralick Inverse difference moment (F4)	OD Sum: Haralick Sum average (F5)	OD Sum: Haralick Sum variance (F6)	OD Sum: Haralick Sum entropy (F7)	OD Sum: Haralick Entropy (F8)	OD Sum: Haralick Difference variance (F9)	OD Sum: Haralick Difference entropy (F10)	OD Sum: Haralick Information measure of correlation 1 (F11)	OD Sum: Haralick Information measure of correlation 2 (F12)	Hematoxylin: Mean	Hematoxylin: Std.dev.	Hematoxylin: Min	Hematoxylin: Max	Hematoxylin: Median	Hematoxylin: Haralick Angular second moment (F0)	Hematoxylin: Haralick Contrast (F1)	Hematoxylin: Haralick Correlation (F2)	Hematoxylin: Haralick Sum of squares (F3)	Hematoxylin: Haralick Inverse difference moment (F4)	Hematoxylin: Haralick Sum average (F5)	Hematoxylin: Haralick Sum variance (F6)	Hematoxylin: Haralick Sum entropy (F7)	Hematoxylin: Haralick Entropy (F8)	Hematoxylin: Haralick Difference variance (F9)	Hematoxylin: Haralick Difference entropy (F10)	Hematoxylin: Haralick Information measure of correlation 1 (F11)	Hematoxylin: Haralick Information measure of correlation 2 (F12)	DAB: Mean	DAB: Std.dev.	DAB: Min	DAB: Max	DAB: Median	DAB: Haralick Angular second moment (F0)	DAB: Haralick Contrast (F1)	DAB: Haralick Correlation (F2)	DAB: Haralick Sum of squares (F3)	DAB: Haralick Inverse difference moment (F4)	DAB: Haralick Sum average (F5)
1-C	9175	7894.8	0.2081	0.3629	0	3.9678	0.0595	0.2389	11.9958	0.7024	20.1532	0.6498	4.4416	57.7764	2.4033	4.5739	0.0097	2.3905	-0.1826	0.7709	0.0908	0.1522	-0.0782	1.397	0.0235	0.3291	8.2378	0.5881	9.9992	0.6979	3.1228	25.8399	2.026	3.8712	0.0118	2.1344	-0.1704	0.7115	0.0407	0.1281	-0.0468	1.7094	0.0105	0.6935	3.3444	0.7645	7.1008	0.8991	1.1546
1-B	12963	7905.3	0.1687	0.4135	0	3.9493	0.0155	0.4129	10.6217	0.7854	24.752	0.7635	3.6506	79.2792	1.8492	3.4438	0.0148	1.8711	-0.2516	0.7909	0.055	0.1185	-0.1125	1.4299	0.0025	0.5204	4.5288	0.6115	5.829	0.8077	1.8508	16.2835	1.4116	2.6711	0.0174	1.5389	-0.2202	0.6926	0.0512	0.1853	-0.0434	1.8437	0.0045	0.7463	5.7194	0.8073	14.8366	0.9082	1.7264
1-A	16818.6	7258.1	0.1649	0.3914	0	4.3875	0.0355	0.383	10.4536	0.7552	21.3467	0.7435	3.3801	67.3529	1.8486	3.5254	0.0137	1.9592	-0.2107	0.7474	0.0582	0.121	-0.1039	1.3311	0.0105	0.5089	4.8977	0.6007	6.1328	0.7957	1.9322	16.9317	1.4624	2.7457	0.0168	1.6051	-0.1969	0.6669	0.0457	0.1712	-0.0444	1.9801	0.0105	0.7415	5.4326	0.7838	12.5655	0.9141	1.3768
2-C	8771.3	11840.3	0.1881	0.4041	0	3.9827	0.0425	0.3505	10.0572	0.7898	23.9259	0.7249	3.9806	75.5228	2.0599	3.8434	0.0129	2.0436	-0.2331	0.7952	0.0703	0.1304	-0.214	1.563	0.0155	0.4413	5.2973	0.6327	7.2115	0.7667	2.3584	19.7608	1.6866	3.158	0.0152	1.7565	-0.2143	0.7249	0.0485	0.1777	-0.0424	1.9442	0.0085	0.7688	4.7512	0.8251	13.585	0.9178	1.5673
2-B	13019.1	11197.3	0.2233	0.5305	0	4.0584	0.0315	0.3837	14.5149	0.8126	38.7334	0.7411	4.8386	124.759	2.0359	3.7153	0.0138	2.027	-0.254	0.8105	0.0612	0.1242	-0.2865	1.2864	0.0085	0.4958	4.9249	0.618	6.4455	0.79	2.0741	17.7783	1.5278	2.8476	0.0165	1.6322	-0.2144	0.7002	0.0793	0.254	-0.0381	1.9685	0.0095	0.6987	10.0198	0.8187	27.6305	0.8853	2.8317
2-A	16917.7	10473.4	0.2606	0.602	0	4.3673	0.0375	0.3404	15.6924	0.8256	44.9786	0.7132	5.5495	144.573	2.2025	3.9968	0.0126	2.1726	-0.2349	0.8065	0.0749	0.1428	-0.2176	1.5077	0.0105	0.4431	6.3834	0.6284	8.5882	0.7549	2.6434	23.1954	1.7525	3.2296	0.0148	1.8322	-0.1953	0.705	0.0889	0.281	-0.0829	2.0673	0.0105	0.6601	10.0414	0.8481	33.0523	0.8784	3.1546
3-C	9139.1	14979.3	0.1542	0.3431	0	3.9493	0.0265	0.4443	9.0471	0.7436	17.6408	0.7684	3.2756	54.042	1.8035	3.3345	0.0153	1.8256	-0.2499	0.7811	0.0625	0.1308	-0.175	1.3761	0.0095	0.5172	5.0306	0.6514	7.2148	0.8012	2.1247	20.53	1.505	2.7765	0.0172	1.579	-0.2376	0.723	0.0349	0.1333	-0.0609	1.8515	0.0045	0.7936	3.8408	0.7471	7.5925	0.9243	1.0908
3-B	12981.7	14352.1	0.1618	0.2903	0	3.8804	0.0465	0.3084	7.7325	0.7033	13.0316	0.711	3.3986	37.5139	2.1054	3.9777	0.0121	2.0628	-0.2249	0.7939	0.0752	0.1345	-0.1514	1.53	0.0175	0.396	5.6872	0.6289	7.6624	0.7473	2.5571	20.7065	1.8025	3.4034	0.0141	1.8582	-0.213	0.7417	0.0272	0.0921	-0.0655	1.7382	0.0085	0.7972	1.9803	0.727	3.6265	0.9348	0.6524
3-A	16951.4	13571.2	0.2192	0.5309	0	4.3295	0.0315	0.3904	13.2399	0.8151	35.8079	0.7353	4.6307	115.659	2.0216	3.6715	0.0137	2.0394	-0.2296	0.7807	0.0709	0.1408	-0.1554	1.4103	0.0095	0.4717	6.177	0.6301	8.3483	0.7686	2.4975	22.8413	1.6806	3.0741	0.0156	1.7598	-0.2022	0.7026	0.067	0.2423	-0.0382	2.0067	0.0095	0.7487	7.9938	0.8384	24.729	0.9088	2.3067
4-C	9394.9	18054.6	0.143	0.3093	0	4.1534	0.0285	0.4132	8.2427	0.7154	14.4802	0.7661	2.9988	43.6295	1.8192	3.4	0.0149	1.8231	-0.2492	0.7848	0.0572	0.1181	-0.2604	1.5073	0.0095	0.5076	4.3121	0.6307	5.8384	0.8059	1.8811	16.4868	1.4544	2.7336	0.0172	1.5427	-0.2327	0.7131	0.0335	0.1188	-0.0664	1.7614	0.0055	0.7641	3.613	0.7006	6.0333	0.9172	0.9886
4-B	13268.3	17198.5	0.1219	0.3352	0	4.3461	0.0125	0.5334	7.9824	0.7542	16.2388	0.8159	2.5138	52.2302	1.4623	2.7142	0.0179	1.5546	-0.2526	0.7347	0.0441	0.1084	-0.1642	1.3918	0.0025	0.615	3.93	0.5966	4.8709	0.8468	1.4406	13.9216	1.1736	2.1713	0.0199	1.3036	-0.2297	0.653	0.0329	0.1447	-0.0417	1.901	0.0025	0.8298	3.9741	0.7773	8.9217	0.9396	1.026
4-A	17455.4	16553.8	0.2944	0.6372	0	4.1956	0.0405	0.326	19.6572	0.8067	50.856	0.6929	6.3406	158.903	2.388	4.2418	0.0119	2.3074	-0.2288	0.8122	0.0868	0.1548	-0.095	1.394	0.0135	0.3973	7.5451	0.6294	10.1786	0.7262	3.1095	26.8765	1.9469	3.5676	0.0135	1.9851	-0.1924	0.7245	0.0984	0.2985	-0.06	1.9861	0.0105	0.6724	13.9356	0.8144	37.5317	0.8706	3.5798
5-C	9678	21278.7	0.1767	0.3199	0	4.2326	0.0495	0.2975	9.2882	0.7042	15.698	0.6976	3.7386	45.2797	2.199	4.1312	0.0116	2.1474	-0.2136	0.7882	0.0763	0.1328	-0.328	1.62	0.0195	0.3815	5.6424	0.6239	7.5006	0.7393	2.5722	20.1234	1.8276	3.4677	0.0136	1.8913	-0.2003	0.7287	0.0352	0.1153	-0.044	1.7423	0.0085	0.7355	3.4253	0.7002	5.7125	0.9087	0.999
5-B	13594.7	20328.5	0.1532	0.2454	0	4.6025	0.0575	0.2588	6.6871	0.6416	9.3297	0.6938	3.0878	25.3765	2.1005	4.0812	0.0112	2.0979	-0.1948	0.7617	0.0829	0.1407	-0.0813	1.5927	0.0255	0.3405	6.1817	0.6375	8.5274	0.7259	2.7677	23.2119	1.9007	3.672	0.0128	1.967	-0.2012	0.7447	0.0142	0.0336	-0.0335	1.7258	0.0085	0.8687	0.3336	0.6096	0.4273	0.9662	0.1005
5-A	17757.6	22077.5	0.2611	0.4897	0	4.4844	0.0595	0.2503	16.3993	0.7549	33.4484	0.6518	5.6868	99.4511	2.5851	4.7353	0.01	2.4593	-0.209	0.8141	0.1039	0.178	-0.3048	1.5474	0.0225	0.3348	9.9425	0.6393	13.7836	0.6948	3.7023	36.8128	2.1547	4.0108	0.0119	2.1809	-0.1898	0.7494	0.0605	0.1978	-0.0473	1.945	0.0115	0.6713	7.1533	0.7855	16.6747	0.879	1.9794
6-C	9801.8	23950.3	0.2471	0.4869	0	4.4544	0.0575	0.2496	14.2887	0.7844	33.1436	0.656	5.3248	102.443	2.4965	4.6087	0.01	2.3956	-0.2053	0.8034	0.0841	0.136	-0.1364	1.5252	0.0215	0.3367	6.2086	0.6071	7.9006	0.7072	2.8637	20.4206	1.9835	3.7561	0.0122	2.0367	-0.1789	0.7174	0.0713	0.2238	-0.0514	2.0625	0.0115	0.6795	8.3959	0.8047	21.4964	0.8759	2.4589
6-B	13456	23592.8	0.1636	0.4484	0	4.3673	0.0285	0.504	9.4614	0.8219	26.556	0.7995	3.3469	88.5068	1.6191	2.928	0.0171	1.6605	-0.2529	0.7531	0.0525	0.1197	-0.1158	1.4544	0.0085	0.5704	4.6836	0.6106	6.014	0.8241	1.7371	17.0751	1.3249	2.4414	0.0186	1.4457	-0.2144	0.6621	0.0504	0.2067	-0.0427	1.9755	0.0075	0.8228	5.2013	0.8557	18.0261	0.9361	1.7053
6-A	17508.4	25031.7	0.3129	0.5849	0	4.4264	0.0685	0.2211	15.8737	0.8312	47.0185	0.6411	6.8074	147.374	2.7253	4.9291	0.0095	2.4875	-0.2293	0.8459	0.1059	0.1695	-0.3124	1.5391	0.0255	0.3154	8.8372	0.6479	12.5484	0.6867	3.731	33.0951	2.2114	4.1079	0.0115	2.1875	-0.1949	0.7621	0.0908	0.2712	-0.0351	2.0131	0.0135	0.678	8.5278	0.863	31.1254	0.8802	3.2048
7-B	13915.6	27136.8	0.1192	0.3113	0	4.2784	0.0145	0.495	7.777	0.7231	14.0423	0.7938	2.4409	44.0741	1.5304	2.8832	0.0166	1.6724	-0.2085	0.6952	0.0457	0.1092	-0.1218	1.3232	0.0025	0.578	4.1677	0.5759	4.9132	0.8288	1.5156	13.7312	1.2518	2.3395	0.0188	1.4103	-0.1994	0.6313	0.0294	0.1277	-0.0424	1.9073	0.0045	0.8181	3.2198	0.7699	6.9954	0.9382	0.8522
7-A	17789.1	28551.1	0.2794	0.4771	0	4.1912	0.0755	0.1918	16.2089	0.7622	34.0824	0.6301	6.1114	101.206	2.7637	5.0812	0.009	2.5237	-0.2195	0.8419	0.1038	0.1631	-0.1261	1.5884	0.0265	0.3189	7.5222	0.6764	11.6216	0.6962	3.6214	31.1242	2.169	4.0411	0.0118	2.12	-0.2116	0.7809	0.0728	0.1962	-0.0401	1.9034	0.0185	0.5618	8.6129	0.7453	16.9048	0.8431	2.3379
8-B	14060.7	30357.8	0.1762	0.3972	0	3.9937	0.0285	0.3998	12.3204	0.7344	23.189	0.7403	3.7956	70.8041	1.9699	3.6359	0.0139	2.0077	-0.2209	0.7677	0.0599	0.1263	-0.1418	1.4281	0.0065	0.4976	5.4285	0.5916	6.6463	0.7889	2.0577	18.1223	1.5257	2.8446	0.0165	1.65	-0.2021	0.6833	0.0509	0.1711	-0.0403	1.8268	0.0075	0.6999	6.519	0.7428	12.6723	0.8884	1.6637
[truncated: 130 more columns]
